# Supplementary material for: Underestimation of boreal soil carbon stocks by mathematical soil carbon models linked to soil nutrient status
Source: Copernicus journal article supplement (doi:10.5194/bg-2015-657), 2016-01-18
Supplement: Supplementary file [file bg-2015-657-AC1-supplement.pdf]

**Author's reply to Prof G. I. Ågren (Referee):  
Interactive comment on "Underestimation of boreal soil carbon stocks by mathematical soil carbon models linked to soil nutrient status" by B. Ľupek et al.**

Received and published: 16 February 2016

Boris Ľupek\*, Carina A. Ortiz, Shoji Hashimoto, Johan Stendahl, Jonas Dahlgren, Erik Karlton, and Aleksi Lehtonen  
\* [boris.tupek@luke.fi](mailto:boris.tupek@luke.fi)

**Referee's comments are highlighted by bold font.**

# Symbol and font used to indicate author's reply

General comments

**This is an interesting paper.**

# Thank you, we appreciate all your comments, considered them carefully, and reply below to each of them!  
The marked up manuscript with highlighted changes is attached to this file.

**Three structurally quite different soil carbon models give very similar predictions of forest soil carbon stocks when they are driven by the same litter inputs and differ also similarly from observations. The critical question is why they fail in their predictions for 22% of the test sites. The authors attribute the failure to weaknesses in how the models handle soil nutrient status. This might well be the case, but such a failure can come from two quite different sources. On one hand, is the litter input correctly calculated?**

# Yes the litter input is calculated correctly, as we are aware that the correct calculation of the litter input is essential for the simulation of the soil carbon sequestration and the estimation method has large influence on the sequestered soil carbon. E.g. see SOC and litter relations in supplement figure FS6 and results lines 306 - 310.

**The procedure used to generate litter input is not transparent.**

# We are aware that our description of the novel approach of litter input estimation may not be transparent in general concept in Sect. 2.1.1 "Biomass and litterfall estimates", therefore we added detailed descriptions for reproducing the methods to appendices (Appendices A, B, and C, Tables A1, B1, and C1, and Figures A1, B1, and S9). At first, the novel method could seem complicated compared to the estimation by using only the allometric biomass models. However, the measurements of actual state forest could not be applied directly to biomass models in order to derive the long-term litter inputs due to differences in stand age classes and our method to remove the effect of the actual stand development was crucial for estimating long-term mean litter input correctly.

**The calculation is based on fAPAR (the fraction of absorbed photosynthetically active radiation) but the maximum/potential value of absorbed radiation seems to be ignored. However, both the potential production and fAPAR vary with the nutrient status of the stand. In the end, it seems to me that the procedure generates tree biomasses and thus litter production only depending on latitude;**

# We are sorry that you partly misunderstood whether the maximum/potential value of absorbed radiation was taken into account. What we meant to describe was that fAPAR was based on the field data, the maximum observed fAPAR was certainly taken into account, and it was specific for latitude and nutrient status, and served as a prerequisite for the estimated 70<sup>th</sup> percentile of fAPAR ( $f_{\text{APAR}70}$ ). The nutrient status was in our data represented by a productivity class (H100, height of the dominant trees at the age of 100 years in meters). Both latitude and the H100 data were used in estimation of the  $f_{\text{APAR}70}$  values (Appendix A1 lines 508 - 513, Table A1 and Fig. A1). We think that adding panels showing the relation between modeled  $f_{\text{APAR}70}$  and H100 data into Fig. A1 will clear the confusion about relation between fAPAR and site productivity/nutrient status (see attached updated Fig. A1).

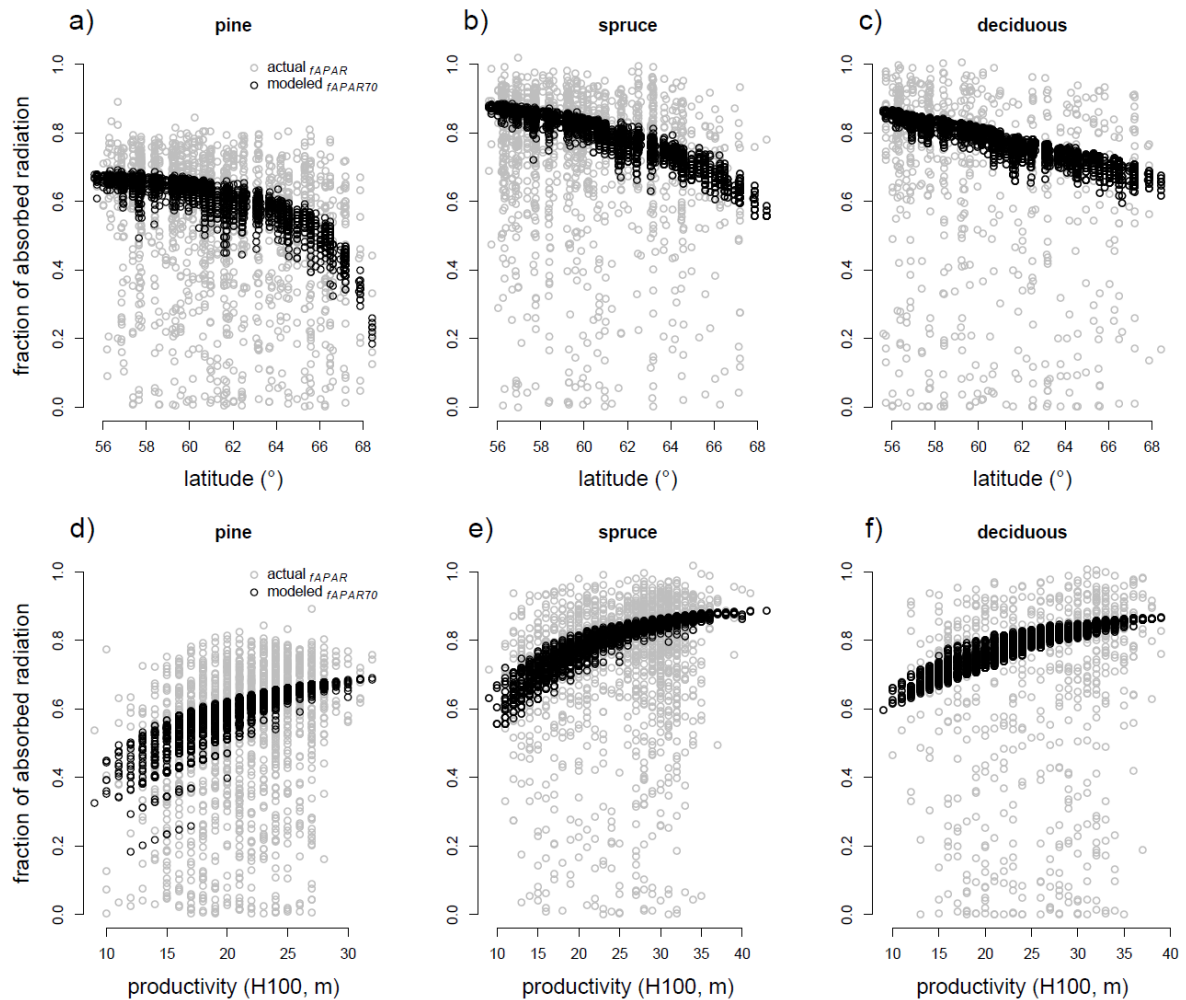

Figure A1. Actual state fraction of absorbed radiation ( $f_{APAR}$ , estimated as in Härkönen et al., 2010) (actual  $f_{APAR}$ ) and steady state  $f_{APAR}$  (modeled  $f_{APAR70}$ ) which was set to 70th percentile of maximum  $f_{APAR}$  for given species, latitudinal degree, and site productivity class. Panels a), b), and c) show relation between  $f_{APAR}$  and latitude ( $^{\circ}$ ) for forest stands dominant by Scots pine, Norway spruce and deciduous species, whereas panels d), e), and f) show relation between  $f_{APAR}$  and site productivity class (H100, height of dominant trees at 100 years in meters).

**this will ignore the large regional differences in nitrogen deposition that play an important role in tree productivity, likely leading to an underestimate of litter production in high deposition areas.** #A figure (Fig. R1) in this reply shows that productivity class (H100) of deciduous, pine, and spruce forests used in this study for the long-term litter input modelling was well correlated with Nitrogen deposition data (panels a, b, and c). However if using the actual state forests measurements directly, with only the allometric biomass models approach, the forest stage development masked the relationship between the nutrient status and the litterfall estimates (actual state forest litter in panels d, e, and f). In our approach with the stage development set to a 70<sup>th</sup> percentile of the maximum production potential, the litterfall estimates (long-term mean litter) reflected well the differences in Nitrogen deposition (panels g, h, and i).

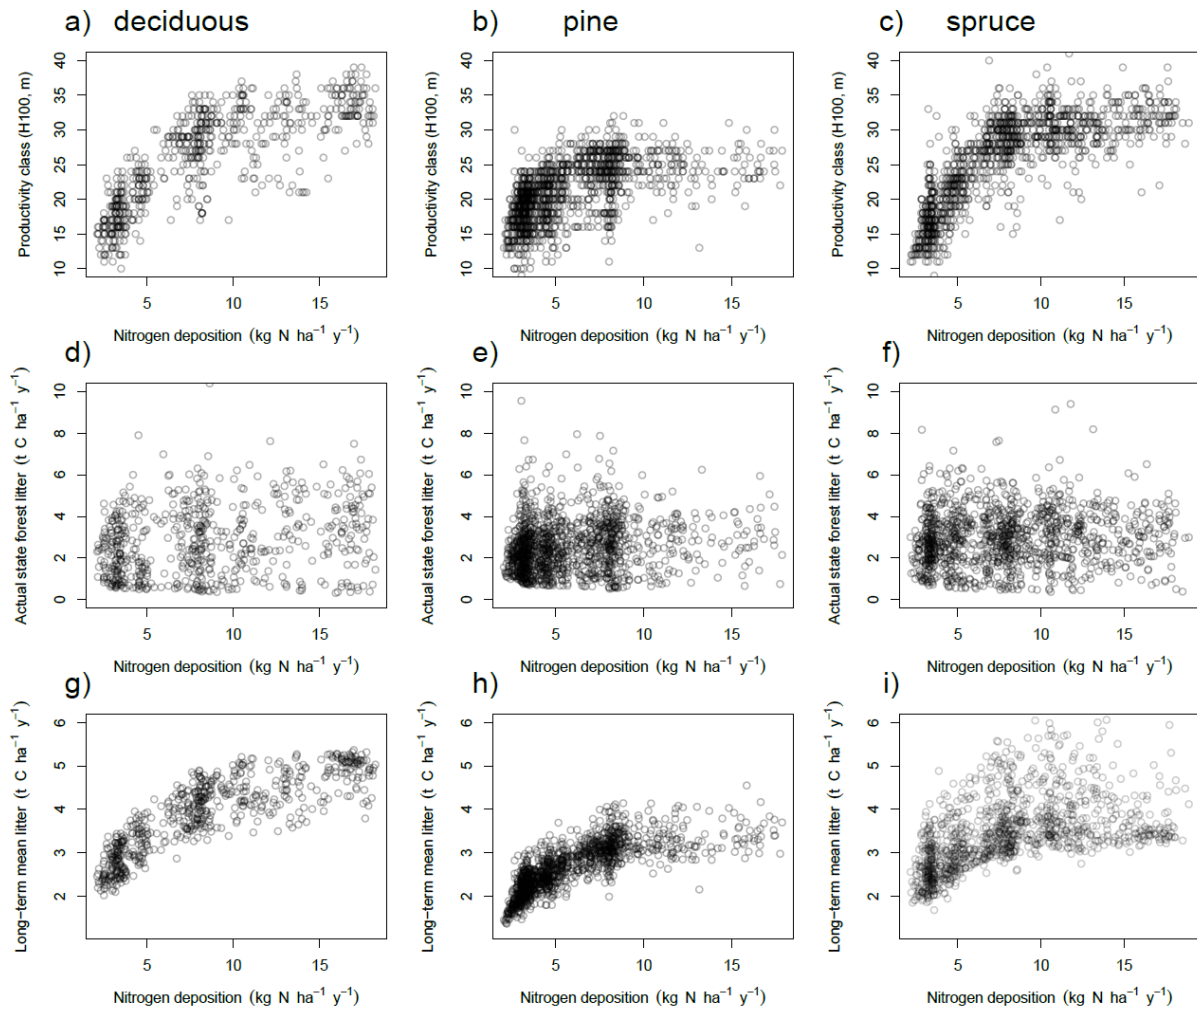

Figure R1. Scatterplots between the Nitrogen deposition ( $\text{kg N ha}^{-1} \text{y}^{-1}$ ) and a), b), c) site productivity class (H100, which is the height of the dominant trees at the age of 100 years in meters), d), e), f) actual state forest litterfall ( $\text{t C ha}^{-1} \text{y}^{-1}$ ), and g), h), i) long-term mean “steady state” forest litterfall ( $\text{t C ha}^{-1} \text{y}^{-1}$ ) for deciduous species, Scots pine, and Norway spruce dominated stands.

**On the other hand, it is clear that soil nitrogen modifies the carbon use efficiency of decomposers; increasing nitrogen availability increases CUE, which increases soil carbon stocks (Ågren et al. 2001, Franklin, et al. 2003). In all three models, inclusion of either of these two factors would improve the model performance at the high nutrient sites.**

*#We added your comment into discussion, by reformulating sentence on lines 343-345, complementing on studies of Fernandez-Martinez et al. 2014, and Manzoni et al. 2012.*

“Larger net soil carbon accumulation in nutrient rich sites could be attributed to the relative differences in litterfall components (relatively more leaves and branches with higher N content than fine roots), and to higher N availability and carbon use efficiency of decomposers, reduction of respiration per unit of C uptake (Ågren et al. 2001, Manzoni et al. 2012, Fernandez-Martinez et al., 2014).”

Manzoni, S., Taylor, P., Richter, A., Porporato, A. and Ågren, G. I.: Environmental and stoichiometric controls on microbial carbon-use efficiency in soils, *New Phytol.*, 196, 79-91, 2012.

*#We also added citation of Franklin et al. (2003) after the sentence on line 347.*

“The soils with large N deposition were also highly productive and showed high to exceptionally high SOC stocks (Fig. 2, Fig. 3, soil groups 7 and 8). This was in agreement with fertilization and modelling study of Franklin et al. (2003) showing an increase in soil C accumulation with N addition.”

### Specific comments

#### **1. Line 78. effects should be affects**

*#Effects was changed to affects*

#### **2. Line 221. It is not clear what is meant by “the 2012Q model”. Should it be 2011 or 2013?**

*#We changed it to 2011, because 2011 was the calibration of the model and 2013 was an application on larger regions, no calibration.*

#### **3. Line 343. Why should decreased microbial demand for nitrogen lead to increased soil carbon?**

*#We reformulated sentence on lines 343-345 as described in general comments*

#### **4. Line 387. Why should inorganic nutrient uptake by mycorrhiza lead to underestimated SOC stocks on medium-highly productive sites?**

*#In lines 386-388 based on finding of Orwin et al. (2011) we suggest that not accounting for the available nutrients from the organic (not inorganic) uptake by models contributes to their underestimation of SOC stocks on sites with higher nutrient status. We reformulated the sentence.*

“Expanding on the CENTURY model structure, the MySCaN model incorporating the organic nutrient uptake by mycorrhizal fungi estimated positive effect on SOC accumulation, relatively larger in poor than in fertile sites (Orwin et al.,2011). Therefore, not accounting for the organic nutrient uptake by mycorrhizal fungi by the Yasso07, Q, and CENTURY models probably led to the underestimation of SOC stocks in sites with higher nutrient status.”

Orwin, K. H., Kirschbaum, M. U., St John, M. G. and Dickie, I. A.: Organic nutrient uptake by mycorrhizal fungi enhances ecosystem carbon storage: a model-based assessment, *Ecol. Lett.*, 14, 493-502, 2011.

### **Cited literature**

**Franklin, O., et al. (2003). "Pine forest floor carbon accumulation in response to N and PK additions - Bomb 14C modelling and respiration studies." *Ecosystems* 6: 644-658.**

**Ågren, G. I., et al. (2001). "Combining theory and experiment to understand effects of inorganic nitrogen on litter decomposition." *Oecologia (Heidelb.)* 128: 94-98.**

*#Thank you for providing these references.*

# Underestimation of boreal soil carbon stocks by mathematical soil carbon models linked to soil nutrient status

B. Ľupek<sup>1</sup>, C. A. Ortiz<sup>2</sup>, S. Hashimoto<sup>3</sup>, J. Stendahl<sup>2</sup>, J. Dahlgren<sup>4</sup>, E. Karlton<sup>2</sup>,  
and A. Lehtonen<sup>1</sup>

<sup>1</sup>Natural Resources Institute Finland, P.O. Box 18, 01301 Vantaa, Finland

<sup>2</sup>Swedish University of Agricultural Sciences, P.O. Box 7014, 75007 Uppsala, Sweden

<sup>3</sup>Forestry and Forest Products Research Institute, Tsukuba, Ibaraki 305-8687, Japan

<sup>4</sup>Swedish University of Agricultural Sciences, Skogsmarksgränd, 90183 Umeå, Sweden

*Correspondence to:* B. Ľupek (boris.tupek@luke.fi)

**Abstract.** Inaccurate estimate of the largest terrestrial carbon pool, soil organic carbon (SOC) stock, is the major source of uncertainty in simulating feedback of climate warming on ecosystem-atmosphere carbon exchange by process based ecosystem and soil carbon models. Although the models need to simplify complex environmental processes of soil carbon sequestration, in a large  
5 mosaic of environments a missing key driver could lead into a modelling bias in predictions of SOC stock change.

We aimed to evaluate SOC stock estimates of process based models (Yasso07, Q, and CENTURY) against the Swedish forest soil inventory data (3230 samples) organized by recursive partitioning method into distinct soil groups with underlying SOC stock development linked to physicochemical  
10 conditions.

The Yasso07 and Q models that used only climate and litterfall input data and ignored soil properties generally agreed with two third of measurements. However, in fertile sites with high nitrogen deposition, high cation exchange capacity, or moderately increased soil water content, Yasso07 and Q underestimated SOC stocks. Accounting for soil texture (clay, silt, and sand content) and structure  
15 (bulk density) in CENTURY model showed no improvement on carbon stock estimates, as CENTURY deviated in similar manner.

Our analysis suggested that the soils with poorly predicted SOC stocks, as characterized by the high nutrient status and well sorted parent material, indeed have had other predominant drivers of SOC stabilization lacking in the models presumably the mycorrhizal organic uptake and organo-mineral  
20 stabilization processes. Our results imply that the role of soil nutrient status as regulator of organic matter mineralization has to be re-evaluated, since correct steady state SOC stocks are decisive for predicting future SOC change.

## 1 Introduction

In spite of the historical net carbon sink of boreal soils, 500 Pg of carbon since the last ice age  
25 (Rapalee et al., 1998; DeLuca and Boisvenue 2012; Scharlemann et al., 2014), boreal soils could be-  
come a net source of carbon to the atmosphere as a result of long-term climate warming (Kirschbaum  
2000; Amundson 2001). They have the potential to release larger quantities of carbon than all an-  
thropogenic carbon emissions combined (337 Pg) (Boden et al., 2010). In order to preserve the soil  
carbon pool and to utilize the soil carbon sequestration potential to mitigate anthropogenic CO<sub>2</sub>  
30 emissions, mitigation strategies of climate forcing aim to improve soil organic matter management  
(Schlesinger 1999; Smith 2005; Wiesmeier et al., 2014).

Supporting soil management decisions requires an accurate quantification of spatially variable soil  
organic carbon (SOC) stock and SOC stock changes (Scharlemann et al., 2014). The initial level of  
SOC stock is essential in order to estimate SOC stock changes (Palosuo et al., 2012, Todd-Brown  
35 et al., 2014), especially when estimating carbon emissions due to land-use change e.g. afforestation  
of grasslands (Berthrong et al., 2009). Process-oriented soil carbon models like CENTURY, Roth-C,  
Biome-BCG, ORCHIDEE, JSBACH, ROMUL, Yasso07 and Q are important tools for predicting  
SOC stock change, but there are also risks for poor predictions (Todd-Brown et al., 2013, DeLuca  
and Boisvenue 2012). The models need further validation and improvement as they show poor spatial  
40 agreement on fine scale and moderate agreement on regional scale against SOC stock data (Todd-  
Brown et al., 2013; Ortiz et al., 2013). Despite the potentially quantitative importance of CO<sub>2</sub> emis-  
sions the expected change will be small in relation to the SOC stock. Therefore, the uncertainty  
of measurements and/or model estimates could prevent conclusions on SOC stock changes (Palosuo  
et al., 2012; Ortiz et al., 2013; Lethonen et al., 2015a) especially for the soils with largest SOC stocks  
45 which are the most sensitive to carbon loss. Beside large uncertainties, the poor agreement between  
the modelled and measured SOC stocks (Todd-Brown et al., 2013) could also indicate missing biotic  
or abiotic drivers of long-term carbon storage (Schmidt et al., 2011; Averill et al., 2014).

For example ignoring the essential role of soil nutrient availability in ecosystem carbon use ef-  
ficiency (Fernández-Martínez et al., 2014) could lead to missing important controls of plant litter  
50 production and soil organic matter stabilization mechanisms. Soil nutrient status is linked to the  
mobility of nutrients in the water solution (Husson et al., 2013), production, quality and microbial  
decomposition of plant litter (Orwin et al., 2011), and formation of the soil organic matter (SOM).  
The SOM affects soil nutrient status by recycling of macronutrients (Husson et al., 2013), and water  
retention and water availability (Rawls et al., 2003).

55 In spite of state of the art soil carbon modelling based on the amount and quality of plant litter  
“recalcitrance”, affected by climate and/or soil properties as in the Yasso07, Q and CENTURY  
models, these type of process based models do not include mechanisms for SOM stabilization by a)  
the organic nutrient uptake by mycorrhizal fungi; b) humic organic carbon interactions with silt-clay  
minerals; and c) the inaccessibility of deep soil carbon and carbon in soil aggregates to soil biota

60 (Orwin et al., 211; Sollins et al., 1996; Torn et al., 1997; Six et al., 2002; Fan et al., 2008; Dungait  
et al., 2012; Clemente et al., 2011). Although the models do not contain aforementioned mechanisms  
and controls for changes in SOM stabilization processes, they have been parameterized using a wide  
variety of datasets and can treat soil biotic, physicochemical and environmental changes implicitly.  
The Yasso07 model (Tuomi et al., 2009, 2011) is an advanced forest soil carbon model and it is used  
65 for Kyoto protocol reporting of changes in soil carbon amounts for the United Nations Framework  
Convention on Climate Change (UNFCCC) by European countries e.g. Austria, Finland, Norway,  
and Switzerland. The Q model (Ågren et al., 2007) is a mechanistic litter decomposition model  
developed in Sweden and used e.g. to compare results produced with Swedish national inventory data  
(Stendahl et al., 2010, Ortiz et al., 2011) and also with other models at national or global scales (Ortiz  
70 et al., 2013; Yurova et al., 2010). The CENTURY model (Parton et al., 1987, 1994, Adair et al., 2008)  
is one of the most widely applied models and it is used for soil carbon reporting to UNFCCC by  
Canada, Japan, and USA. Although individual parameters and functions vary, mathematical models  
such as Yasso07, Q and CENTURY have similar structures. For example, these models are driven  
by the decomposition rates of litter input and soil organic matter (SOM). Decomposing litter and  
75 SOM is divided into pools based on litter quality, and its transfer from one pool to another is apart  
from model functions and parameters affected by temperature (Q) and/or water (Yasso07), and/or  
soil texture and structure (CENTURY). The Q model does not include explicit moisture function,  
whereas for the Yasso07 and CENTURY models precipitation ~~effects~~affects decomposition (Tuomi  
et al., 2009; Adair et al., 2008). On the other hand, the models do not explicitly or by default include  
80 mechanisms that reduce decomposition by excessive precipitation/moisture (Falloon et al., 2011).

We hypothesized that (1) soil carbon estimates of the Yasso07, Q, and CENTURY models would  
deviate for soils where SOC stabilization processes not implicitly accounted by the models are pre-  
dominant, (2) the Yasso07 and Q models ignoring soil properties would fail on the nutrient rich sites  
of South-West coast of Sweden and on occasionally paludified clay and silt soils, and (3) the CEN-  
85 TURY model outperforms the Yasso07 and Q models due to fact that it includes soil properties as  
input variables.

We grouped Swedish forest soil inventory data into homogenous groups with specific soil physic-  
ochemical conditions using regression tree and recursive partitioning modelling methods. After that  
we ran the models into a steady state with a litter input which was derived from the Swedish forest  
90 inventory. Thereafter we compared the model estimates against data by groups that were obtained  
from the regression tree model. In discussion we address the reasons why the models deviate and  
indicate directions of further improvements.

## 2 Material and methods

### 2.1 Measurements

95 We analysed data from the Swedish forest soil inventory (SFSI) which is a stratified national grid survey of vegetation and physicochemical properties of soils (SLU, 2011, Olsson et al., 2009). All analysis was done using R software for statistical computing and graphics (R core team 2014). The soil data were identical to dataset used in Stendahl et al. (2010). We restricted our sample plots to minerogenic soils since the Q, Yasso07, and CENTURY models were not developed for use on  
100 peat soils, and only to plots for forest land use with Swedish forest inventory data (SFI). We also excluded samples with total soil organic carbon (SOC) stock below 2.8 and above 470.5 ( $\text{tC ha}^{-1}$ ), i.e. samples with SOC stock below 0.01 and 99.9 percentile. Measurement data originated from the 1993 to 2002 which constitute a full inventory, and from 2020 sample plots located around Sweden, and in total it including 3230 samples. For each sample plot the weather (years 1961-  
105 2011) and N deposition (years 1999-2001) data was retrieved from the nearest stations of Swedish Meteorological and Hydrological Institute (SMHI) network (Fig. 1). The plots which were linked by the closest distance to the given weather station had the same weather and N deposition data, and the number of soil samples per station ranged between 10 and 70. The mean total SOC stock of samples corresponding to weather stations ranged between 40 and 200 ( $\text{tC ha}^{-1}$ ), and the SOC stock level  
110 increased from the South to North of Sweden (Fig. 1).

Each sample plot contained categorical data from the field survey on the sorting of soil parent material, humus type, soil texture, and soil moisture. In our analysis we reduced categorical classes by basing them on the sorting of soil parent material and humus type (Table 1). We determined numeric values for silt, clay, and sand content from soil texture categories by Albert Atterberg's distribution  
115 of the different grain size fractions in tills and by Lindén's (2002) distributions for sediments (Table 1). We also determined numeric values of volumetric soil water content (SWC) from categorical field data classified according to the depth of the ground water level (WL) and the observations of Tupek et al. (2015) (Table 1).

As typical for soil carbon inventories, the variation of data was large (Table 2). For example,  
120 the mean total SOC stock of all samples was 93 ( $\text{tC ha}^{-1}$ ) while 1st and 99th percentiles were 17 and 309 (Table 2). The mean SOC stock was 33.3 and 66.8 ( $\text{tC ha}^{-1}$ ) for the humus horizon and the mineral soil. The mean values of cation exchange capacity (CEC) 23.9 ( $\text{mmol}_c \text{kg}^{-1}$ ), the base saturation 36.4%, and the C/N ratio 16.5 indicated conditions of medium fertility, although the soils were mostly acidic (mean pH was 5.2). The mean prevailing soil water content (22.3) was typical  
125 for the well-drained forest soils. The mean annual temperatures ranged from below 0 to above 8 °C, and annual precipitation varied between 392 and 1154 mm (Table 2). Total SOC stock for all the samples generally increased for peat and peat like humus forms, for well sorted sediments, for soils with high fraction of silt and clay and with increasing soil moisture (Fig. S1).



### 2.1.1 Biomass and litterfall estimates

130 Forest stand biomass was estimated by allometric biomass functions for stem with bark, branch, foliage, stump, coarse-roots and fine-roots applied to basic tree dimensions (breast height diameter, total height of tree, number of trees) of SFI stands (Marklund 1988; Pettersson and Ståhl 2006; Repola 2008; Lehtonen et al., 2015b). In order to simulate “steady state” soil carbon stock we estimated long term mean forest biomass, referred to as “steady state forest” below.

135 We adopted an actual fraction of photosynthetically active absorbed radiation ( $f_{APAR}$ , Fig. A1) as a relative indicator of a site’s capacity to produce biomass (minimum = 0, maximum = 1). The  $f_{APAR}$  was calculated based on basic tree measurements as in Härkönen et al. (2010) and for the main tree species (pine, spruce, deciduous) it was well correlated with the stand basal area (Appendix A). The steady state forest  $f_{APAR}$  values were assumed to be in a range between the median and the  
140 maximum fraction of the actual state forest  $f_{APAR}$  for a given species, latitudinal degree, and site productivity class (Appendix A).

We modelled the steady state biomass by applying the fitted exponential functions between the measured forest biomass components (stem, branch, foliage, stump, coarse-roots, fine-roots) “actual state” and the actual fraction of absorbed radiation ( $f_{APAR}$ ) (Appendix B) to the “steady state”  
145 forest  $f_{APAR70}$ . The  $f_{APAR70}$  was the estimated 70th percentile of the actual fraction of absorbed radiation specific for a given species, latitudinal degree, and site productivity class, Fig. B1). We selected the 70th percentile out of a range from the 50th to 95th, because the modelled soil carbon distributions with a litter input from the  $f_{APAR70}$  biomass best agreed with the measured soil carbon distributions (Fig. S2). The ground vegetation of the steady state forest was estimated by applying  
150 our ground vegetation models (Appendix C) to the modelled steady state forest, and plot specific environmental conditions.

In order to derive the litter inputs, annual turnover rate (TR) of biomass components were applied to the modelled biomass components of the steady state forest. The needle litter TR was a linear function of latitude for pine and spruce and a constant for deciduous species (Ågren et al., 2007). The  
155 TR of branches and roots were from Mukkonen and Lehtonen (2004), Lehtonen et al. (2004) and the TR of stump and stem were from Viro (1955), Mälkönen (1974, 1977) as cited in Liski et al. (2006). For tree fine roots we assumed there was a difference between tree species and between southern and northern Sweden. For pine, spruce, and birch the fine roots TR were 0.811, 0.868, and 1.0 respectively as reported by Mäidi (2001) and Kurz et al. (1996), and cited in Liski et al. (2006). Kleja  
160 et al. (2008) and Leppälampi-Kujansuu et al. (2014) reported different fine root TR for Southern (1 and 0.83) and Northern Finland (0.5). We interpolated TR according to the mean annual temperature gradient between TR of fine roots in the South and the North. The fine roots TR of 0.811, 0.868, and 1.0 in the warmest southernmost soil plots were thus reduced down to 0.5 in the coldest northernmost soil plots.

## 165 2.1.2 Correlation analysis

Overall our data consists of 3230 soil samples and their carbon stocks linked to soil physicochemical variables, stand and ground vegetation biomass and litterfall components, and nearest weather station environmental variables. We performed the Spearman's rank correlation analysis between the total soil carbon stock and the other soil variables, site, climate and vegetation characteristics. As  
170 expected the total soil carbon stock most strongly correlated with the measured variables used for its calculation e.g. bulk density, depth of humus and mineral soil, carbon content, and stoniness. These variables were excluded from further regression tree analysis which aimed to group data according to the processes of soil carbon stock development.

## 2.1.3 Regression trees

175 In order to organize SOC data into groups according to the physicochemical soil variables and to better understand the nature of measured data, we generated regression trees of SOC stocks by using recursive partitioning (RPART) (Therneau and Atkinson 1997). RPART is based on developing decision rules for predicting and cross validation of continuous output of soil carbon stocks (regression tree). The classification tree was built by finding a single variable which best splits the data into two  
180 groups. Each sub-group was recursively separated until no improvement could be made to the soil carbon stock estimated by using the split based regression model. The complex resultant regression tree model was cross validated for a nested set of sub trees by computing the estimate of soil carbon stock to trim back the full tree.

When building the regression tree models we excluded variables such as bulk density, carbon  
185 contents of soil layers, soil depth, and stoniness, since these measured variables were used for determining the total soil carbon stock. The selected variables for the RPART data mining were based on the correlations analysis (see 2.1.2.), the processes of soil organic matter formation (e.g. Husson et al., 2013) and decomposition, and represented the soil categorical variables (sorting of parent material, soil texture, long-term soil moisture and humus form), soil physicochemical variables (sand,  
190 clay, and silt content, long-term soil moisture, highly bound water, C/N ratio, pH, CEC of organic, B, BC, and C horizons), climatic variables (annual mean air temperature, annual precipitation sum), and stand and site characteristics (tree species coverage of pine, spruce and deciduous, total foliar litter input, productivity class and N deposition). Alternatively we also ran regression and classification analysis by excluding all measured soil variables because soil variables are often unavailable  
195 for landscape level modelling.

The regression tree model separated the measured total SOC stocks ( $\text{tC ha}^{-1}$ ) into 10 groups. The cation exchange capacity of the BC horizon ( $\text{CEC, mmol}_c \text{ kg}^{-1}$ ) divided all the samples into 2/3 of lower SOC stock groups (means between 65 and 130  $\text{tC ha}^{-1}$ ) and 1/3 of larger groups (means

between 86 and 269 tC ha<sup>-1</sup>) (Fig. 2a). The group of the smallest SOC stock consisted of 959  
200 samples compared to 8 samples of the group with the largest SOC stocks.

Two-thirds of the smaller SOC stocks were subdivided by CEC and the type sorting of soil parent material (sorted or unsorted). One-third of the larger SOC stocks was subdivided by the C/N ratio, CEC, N deposition among others. Roughly generalized, groups from left to right or from 1 to 10 formed a gradient in levels of SOC stock, moisture, nutrient status, and production (Fig. 2, Table S1).

205 The alternative regression tree model was built with variables other than soil properties. The regression tree with the annual mean air temperature, the annual precipitation sum and the percentage of pine trees in the stand, and the nitrogen deposition separated measured SOC stocks (tC ha<sup>-1</sup>) into five groups (Fig. S3). Colder groups with smaller SOC stocks (means 67 and 85) also had less litter input (below 3 tC ha<sup>-1</sup>) and low productivity class (height of trees at 100 years of age, H100  
210 < 20 m) (Table S2). Nitrogen deposition only slightly impacted the higher productivity class of soils and litter input (Table S2).

## 2.2 Soil carbon stock modelling

The Q model (Rolff and Ågren, 1999) is a continuous mechanistic litter decomposition model describing change of soil organic matter over time. The decomposition rate for the branch, stem, needle,  
215 fine root, and woody litter fractions is controlled by the temperature, litter quality, microbial growth and litter invasion rate. The model has been calibrated for seven climatic regions of Sweden in order to account for Swedish temperature and precipitation gradients (Ortiz et al., 2011) (Table 3). The Q model was applied in several studies of SOC stock and change estimation in Sweden (e.g. Stendahl et al., 2010; Ortiz et al., 2013; Ågren et al., 2007). The Q model was run for seven Swedish climatic  
220 regions (Ortiz et al., 2011). The mean regional parameterization from the calibration of the ~~2012~~ [2011](#) Q model was used for the plot simulations. Thus, the simulations in each region represent variations in climate and litter input and not parameter variations. The steady state soil carbon stocks are estimated in the model using the equation for steady state soil carbon stock which is derived from the decomposition functions with constant amounts and quality of litter input.

225 The Yasso07 model (Tuomi et al., 2009; 2011) is an advanced forest soil carbon model. The model was calibrated based on almost 10 000 measurements of litter decomposition from Europe, North and South America (Table 3). The required annual inputs of litterfall, its size and chemical composition, temperature and precipitation determine the decomposition and sequestration rates of soil organic matter. Yasso07 estimates SOC stock to a depth of 1 m (organic and mineral layers),  
230 change of SOC stock, and heterotrophic soil respiration. The Yasso07 model, which is used for soil carbon Kyoto protocol reporting by several European countries, i.e. Austria, Finland, Norway, and Switzerland, is one of the most widely applied SOC model. Species specific chemical composition of different litter compartments of Yasso07 were used according to Liski et al. (2009). The initial soil organic matter of Yasso07 was zero. The simulated soil carbon stock corresponding to a steady-

235 state between the litter input and decomposition was achieved by a Yasso07 spin-up run of 10 000  
years. Yasso07 runs used litter inputs of the steady state forest biomasses (see 2.1.1.) and climate  
variables (annual air temperature, monthly temperature amplitude, and annual precipitation). The  
global parameter values of decomposition rates, flow rates, and other dependencies of Yasso07 soil  
carbon model were adopted from Tuomi et al. (2011) and the estimates of Yasso07 SOC stocks  
240 were used in comparison with measurements and other models. We did not use the SOC stocks  
simulated with the more recent Yasso07 parameters based on the litter decomposition data from  
the Nordic countries (Rantakari et al., 2012), because the SOC stocks simulated with the global  
parameter values produced better fit with SFSI measurements.

The CENTURY mathematical model originally developed for grassland systems (Parton et al.,  
245 1987) has been since modified for various ecosystems including boreal forests (Nalder and Wein  
2006). The CENTURY is also one of the most widely applied models and it is used for soil carbon  
reporting to UNFCCC by Canada, Japan, and USA. The soil organic matter in the model consists  
of active, slow, and passive pools which have different TR (Table 3). The decomposition rates are  
modified by temperature and moisture, and in addition the decomposition rates of the slow and  
250 passive pools rely on lignin to N and C to N ratios, while the active pool decomposition rate relies on  
soil texture. The model simulates soil organic matter to a depth of 20 cm. The model simulates plant  
production and pools of living biomass, while TR for biomass pools determine the litterfall inputs  
to soil. To compare the performance of the soil sub-model with other soil carbon dynamics models,  
Q and Yasso07, we only used the CENTURY soil sub-model. We used the same litterfall inputs as  
255 used by the Q and Yasso07 simulations, which were estimated by our litterfall modelling (see 2.1.1.).  
For CENTURY we adopted general parameters from the parameter file “tree.100”, parameters of  
site “AND H\_J\_ANDREWS” for conifers, and site “CWT Coweeta” for deciduous trees. The  
nitrogen dynamics in our CENTURY model application were held constant. The CENTURY SOC  
stocks simulation were run with steady state forest litter inputs, site specific soil parameters (specific  
260 bulk density, sand, silt, and clay content) and climate variables (monthly air temperature, monthly  
precipitation). The simulated steady state SOC stocks were estimated by a spin-up run of 5 000  
years. The number of years to reach steady state was sought empirically on 100 random sites, and  
differs from Yasso07 because running CENTURY was computationally more demanding.

### 3 Results

265 The distributions of Yasso07, Q, and CENTURY model estimates of total SOC stocks ( $\text{tC ha}^{-1}$ )  
were in agreement for 2/3 of the measured data with lower SOC stock (Fig. 3, distributions of groups  
1, 2, and 4). The remaining 1/3 of data was underestimated by models. This 1/3 of data was separated  
into 7 physicochemical soil groups (means of groups in range from 104 to exceptionally large 269  
 $\text{tC ha}^{-1}$ , see Fig. 3, distributions of groups 3, and 5-10). The linear regression of mean levels of

270 all 10 physicochemical soil groups (weighted by the number of samples in each group) between  
the modelled and measured SOC stocks showed smaller underestimation of Yasso07 compared to  
the CENTURY and Q models (Fig. 4). The weighted root mean square error (RMSE) was 31.6  
(tC ha<sup>-1</sup>) for Yasso07 and 41.7 and 38.8 for CENTURY and Q respectively. The proportion of  
explained variance was larger for Q ( $r^2 = 0.58$ ) than for Yasso07 and CENTURY ( $r^2 = 0.42$   
275 and 0.39) (Fig. 4). The deviation of the distributions of CENTURY SOC stocks, simulated using  
soil bulk density, sand, silt, and clay content, were similar as for Yasso07 and Q estimates for 10  
physicochemical soil groups (Fig. 3).

As expected, the models clearly showed less variation than the measurements. The shift of the  
mean values from the center of distribution, the width of confidence intervals of means, and the width  
280 of the tails of distributions were clearly larger for the measurements than for the modelled estimates  
(Fig. 3). The modelled distributions agreed for the poor-medium fertility soils with low and medium  
measured SOC stocks, low and medium cation exchange capacity (CEC), unsorted parent material,  
low temperatures and low production (groups 1, 2, and 4) (Fig. 2, Table S1, Fig. 3). Disagreement  
between modelled and measured SOC stock distributions were formed on fertile soils with sorted  
285 parent material (groups 3 and 5), soils with higher water content (groups 3, 5, and 10), where nitrogen  
deposition was large (groups 7 and 8), and where cation exchange capacity (CEC) was median or  
large (Fig. 2, Fig. 3). The largest deviation between the measured and modelled distributions was  
found for the relatively small physicochemical groups of soils (3%) typical for highly bound water  
and peat humus types (groups 8 and 10) (Fig. 2, Fig. 3). The distributions of measured total SOC  
290 stocks (tC ha<sup>-1</sup>) generally increased for the groups with higher nutrient status (Fig. 3, Fig. S4). The  
distributions of SOC stocks in mineral soil were larger than those in humus horizon, and distributions  
of mineral SOC stocks increased with fertility slightly more than distributions of SOC stocks in  
humus horizon (Fig. S4).

After excluding all the soil physicochemical characteristics from the recursive partitioning, the  
295 SOC stock distributions of 5 groups regression tree model (Fig. S3, Table S2) were in agreement  
between the measurements and model estimates for 3 groups (77% of samples) and deviated for 2  
groups (23%) (Fig. S5).

The models underestimated distributions on sites with high (> 10 kgN ha<sup>-1</sup> y<sup>-1</sup>) nitrogen de-  
position (21% of samples) and on sites with warm and dry climate (2% of samples) (Fig. S5). The  
300 modelled SOC stock distributions agreed with measurements for all models on sites with cold annual  
temperatures < 3 °C in northern sites (low-C.cold.pine, low-C.cold.other) (Fig. S5). However, for  
warmer conditions in middle Sweden on sites with low nitrogen deposition SOC stock distributions  
only Yasso07 predictions agreed with the measurements but were underestimated for CENTURY  
and Q estimates.

305 The variation of density functions of modeled SOC stocks for 10 physicochemical groups (Fig. 3)  
was similar to the variation of the total annual plant litter input (tC ha<sup>-1</sup>) (Fig. S6). The mean

levels of annual plant litter input and mean SOC stocks for 10 groups were strongly correlated (the proportion of explained variance of weighted linear regressions ranged between 0.85 for Yasso07 and 0.96 for the CENTURY and Q models). None of the models was able to explain the spatial variations for any of the physicochemical groups well (Fig. S7). Model estimates were correlated better between Yasso07 and CENTURY with an  $r^2$  range from 45 to 66%, whereas  $r^2$  values with Q estimates and the other two models ranged from 12 to 36% (Fig. S8).

## 4 Discussion

### 4.1 SOC stock distributions linked to mechanisms of SOM stabilization

It has been suggested that process based soil carbon models with the current formulation lacking major soil environmental and biological controls of decomposition would fail for conditions where these controls predominate (Schmidt et al., 2011; Averill et al., 2014). Although, the effect of the soil properties on SOC stocks e.g. soil nutrient status in the widely used models such as Yasso07, Q, and CENTURY have not previously been quantitatively evaluated. We found that in comparison with Swedish forest soil inventory (SFSI) data, the models based on the amount and quality of inherent structural properties of plant litter (Q, Yasso07, and CENTURY) produced accurate SOC stock estimates for 2/3 of northern boreal forest soils in Sweden. Two-thirds of the distributions of SOC stocks measurements of SFSI agreed with distributions of SOC stock estimates of the Q, Yasso07, and CENTURY soil carbon models (Fig. 3, distributions of groups 1, 2, and 4). However, the SOC stocks underestimation by these models for one third of the data (Fig. 3, distributions of groups 3, and 5-10) indicated that some drivers other than molecular structure, especially site nutrient status, play an important role in higher SOC stocks sequestration.

Some level of deviation from measurements and poorly explained spatial variation (Fig. S7) was expected from the uncertainties of the SOC measurements, annual plant litter inputs and climate variability for the model SOC stock change estimates (Ortiz et al., 2013; Lehtonen et al., 2015a). For the long-term SOC stock development the model uncertainties are less known than for the short-term litter decomposition. Previously reported fine scale comparison also showed poor agreement between Earth system models and the Northern Circumpolar Soil Carbon Database (Todd-Brown et al., 2013), although drivers of the deviation still remained open. Our results showed that if models strongly depend on the litter inputs (Fig. S6) then the spatial differences between measured and modeled SOC stock distributions could be linked to sites with rich nutrient status through cation exchange capacity, C/N ratio, N deposition, drainage (sorting of parent material) among other factors (Fig. 2 and 3). Additionally, when the soil properties were excluded from the regression, the estimates of SOC stocks also deviated for the fertile groups (Fig. S5). However, the rich nutrient status for these groups was linked to differences in species composition, N deposition, and climate (temperature, precipitation) instead of soil properties (Fig. S3).

Larger net soil carbon accumulation in nutrient rich sites could be attributed to the relative differences in litterfall components (relatively more leaves and branches with higher N content than fine roots) ~~and to the reduced microbial demand for N from fine roots and SOM~~ (, and to higher N availability and carbon use efficiency of decomposers, reduction of respiration per unit of C uptake (Ågren et al. 2001, Manzoni et al. 2012, Fernández-Martínez et al., 2014). Largest deviation between measured and modeled data in our study was found for fertile presumably N rich and fresh to fresh-moist sites. The soils with large N deposition were also highly productive and showed high to exceptionally high SOC stocks (Fig. 2, Fig. 3, soil groups 7 and 8). This was in agreement with fertilization and modelling study of Franklin et al. (2003) showing an increase in soil C accumulation with N addition. Our forest biomass and litterfall estimates were based on forest inventory and modeling, but the site nutrient status was only partially reflected in the amount of biomass/litterfall and its quality. The quality was only reflected through the biochemical differences between species and plant litter components. The relative differences between the biomass/litterfall components or between C/N ratios of litterfall in relation to site fertility are not accounted by the current biomass models, but soil fertility could be considered in an attempt of SOC stock modelling. For example the proportion of acid -, water -, and ethanol-soluble and non-soluble litter inputs for Yasso07 could be re-evaluated by allowing it to vary depending on site fertility, in addition to currently used variation specific for species and the litter components.

The litter decomposition and SOC stabilization rates in Yasso07, Q, and CENTURY based on the litter quality “recalcitrance” originating from the litter bag mass loss measurements have major drawbacks. The mass loss from the litter bags is assumed to be fully mineralized, although the litterbags are subjected to non-negligible leaching (Rantakari et al., 2012; Kammer and Hagedorn, 2011). The SOC stabilization represented in models by the remaining litter mass is thus underestimated due to the fraction of particulate organic matter and dissolved organic carbon that is lost from the litterbags but later immobilized e.g. through organo-mineral stabilization. The use of stable isotopes seems to determine the field carbon mineralization and accumulation rates from the labile (high C quality and N concentration) or recalcitrant (low C quality and N concentration) litter more accurately than litter bags (Kammer and Hagedorn, 2011).

Higher amount of more recalcitrant fine roots compared to more labile leaves (Xia et al., 2015) heavily increased the soil carbon sequestration in CENTURY model simulations which was in line with McCormack et al. (2015). Though, the contribution of fine roots to SOC stabilization is still not settled due to the significant role of mycorrhizal fungi in SOC accumulation (Averill et al., 2014; Orwin et al., 2011). Xia et al. (2015) claimed that more recalcitrant fine roots contribute to stable SOC more than leaf litter, because fine roots degrade slower. This would be supported by the fact if the precursors of fine roots that are degraded by fungi are more stable than the precursors of leaves degraded by microbes. However, more recalcitrant plant litter has been also suggested to stabilize less SOC stocks (Kammer and Hagedorn, 2011). This is a result of recalcitrant litter satisfying less

of the microbial N demands promoting respiration and reducing the long-term production of microbial products, precursors for the organo-mineral stabilization (Cotrufo et al., 2013, Castellano et al., 2015). According to the microbial efficiency-matrix (MEM) stabilization mechanism (Cotrufo et al., 2013) fertile sites with relatively more labile plant litter, but with larger absolute production and larger microbial activity than poor sites, would in long-term stabilize more carbon through organo-mineral stabilization. Our results supported MEM stabilization theory by showing larger carbon stocks in mineral soil than in humus horizon, and by relatively more SOC stocks in mineral soil in fertile groups than in poor conditions (Fig. S4).

Expanding on the CENTURY model structure, the MySCaN model incorporating the organic nutrient uptake by mycorrhizal fungi estimated positive effect on SOC accumulation, relatively larger in poor than in fertile sites (Orwin et al., 2011). ~~Ignoring Therefore, not accounting for~~ the organic nutrient uptake by mycorrhizal fungi by the Yasso07, Q, and CENTURY models probably led to the underestimation of SOC stocks in ~~medium-highly productive soils~~ sites with higher nutrient status. This hypothesis needs to be tested in further studies. We did not have all input data and the source code to include MySCaN into our model intercomparison. The spatial trends of N and P data of litter in Sweden that would be needed to make such study were not available. However, adjusting biomass turnover rates, used for the litter input estimation, in dependence to site fertility would lead into larger inputs for fertile sites and increased SOC stock accumulation as a result of increasing plant productivity and inputs. It is well established that SOM increases soil fertility by improving the soil water and nutrient holding capacity; recycling of SOM increases CEC, humic substances and nutrient availability for plant resulting in larger biomass/litter production (Zandonadi et al., 2013). As an alternative to adjusting turnover rates with site fertility, we suggest that a feedback link in models between increasing fertility due to SOC stock accumulation (e.g. due to increased CEC relative to humus, increased nitrogen availability), increasing litter inputs, and reduced rates of SOC decomposition per unit of litter input (e.g. through satisfying more microbial N demand with less respiration, limited oxygen in increased moisture conditions) would also increase SOC stock accumulation.

Increased moisture and more frequent water saturation due to SOC accumulation limits soil oxygen availability and slows rates of microbial decomposition which increases the rate of SOC stabilization. The CENTURY model has an optional function that represents the reduction of decomposition caused by anaerobic conditions. The function becomes active when a controlling parameter, “drain”, is changed, and the value of the parameter has to be arbitrarily determined through parameter fitting against SOC data (e.g. Raich et al., 2000). The function is meant for anaerobic conditions in poorly drained soils, and therefore is not applicable to (most of) our sites. In addition, tuning a specific parameter to reproduce the SOC data was beyond the scope of this study. Our results, which were derived from mostly well drained soils, suggest that high SOC stocks may be partly caused by reduction of decomposition at increased water content. Detailed modelling of soil water conditions requires specific functions and many parameters, which are not included in simpler SOC models like



Q and Yasso07. However, appropriate modelling of soil water conditions and reduction of decomposition in wet conditions (not necessarily at saturation) would potentially improve the performance of SOC models in particular for soils with high SOC stocks.

## 4.2 Intercomparison of models

420 The similarities between the variations of modeled SOC stocks and litterfall inputs for the soil groups with different fertilities (Fig. 3, Fig. S6) could be expected for the Yasso07 and Q models which ignore the soil properties. These models run organic matter decomposition and humus stabilization with litterfall, temperature and/or precipitations input data. Litter quality as input in Yasso07 and Q implicitly includes some information on soil properties, but as we saw litter quality hardly mapped  
425 any of soil fertility. Unexpectedly the low impact of soil properties on the estimates was seen also in the relatively more complex model CENTURY (accounting for the plot specific bulk density, sand, silt, and clay content in addition to litter input, temperature and precipitation data). Contrary to our expectation, the CENTURY model still heavily depended on the amount of litter input, and its variations of the estimated SOC stocks distributions were similar to those for the Yasso07 and Q  
430 models. In testing multiple soil carbon models with same litter inputs Palosuo et al. (2012) observed larger variation in modeled SOC stocks at the early stage of the litter decomposition (10 years) but later on at 100 years the variation decreased. Although the variations were similar between the models, the estimated CENTURY SOC stocks distributions were slightly lower than the Yasso07 estimates. CENTURY in its original configuration simulated SOC stock up to 20 cm soil depth  
435 (Metherell et al., 1993) whereas the Yasso07, Q, and measured SOC stocks data represented up to 100 cm of the soil (Tuomi et al., 2009, Stendahl et al., 2010). In Yasso07 model parameters were calibrated based on soil age chronosequence data of SOC stocks for soil depths up to 30 cm, which was assumed to represent 60% of the total SOC stocks up to 100 cm soil depth (Liski et al., 1998, 2005 as cited by Tuomi et al., 2009). Therefore, if 40-50% of the missing deep carbon were added on  
440 top of the original CENTURY estimates as is done for Yasso07, the SOC stock levels for CENTURY would be larger than those for the Yasso07 and Q models.

Although estimated SOC stocks of CENTURY were generally lower than those of Yasso07, the correlation between CENTURY and Yasso07 estimates was stronger than for Q model compared to two other models (Fig. S8). The reason was probably similar global parameterizations of Yasso07  
445 and CENTURY whereas Q was specifically parameterized and applied for the regions in Sweden (Ågren and Hyvönen 2003, Ortiz et al., 2013). Furthermore the Q model SOC stock estimates were more sensitive to differences in species coverage e.g. to pine and spruce (Ågren and Hyvönen 2003) and formed two distinct point cloud distributions (one for pine and broadleaves, the other for spruce) when compared with the CENTURY or Yasso07 estimates (Fig. S8). In spite of similarities in Yasso07 and CENTURY SOC stocks estimates, Yasso07 through species specific litterfall  
450 solubility (Liski et al., 2009) was more sensitive to species coverage than CENTURY which treated

conifers in a single group (Metherell et al., 1993). Pine and other species (spruce) coverage was shown to affect measured low and median SOC stocks of colder climate if the soil properties were not considered (Fig. S5). Therefore the pattern of increased accumulation of SOC stock on sites  
455 with larger spruce coverage partially observed in distribution of Yasso07 estimates, and missing in the CENTURY estimates, could be related to the slightly lower solubility/decomposability of spruce compared to pine litterfall. However, the CENTURY model SOC stocks were also highly sensitive to accurate estimation of fineroots litterfall (Mc Cormack et al., 2015) typically increasing with colder climate and increasing the C/N ratio of the organic layer (Lehtonen et al., 2015b) which is driven by  
460 the dominant tree species (Cools et al., 2014).

Large SOC stocks measurements on sites with high long-term nitrogen deposition over 10 kgN ha<sup>-1</sup> y<sup>-1</sup> (Fig. 3 and Fig. S4) were underestimated by the Q, Yasso07, and CENTURY models. A positive correlation between nitrogen deposition and SOC stocks measurements in Sweden had been previously reported by Olsson et al. (2009), and the modelling study by Svensson et al. (2008)  
465 indicated that Swedish soil carbon was decreasing in the North and increasing in the South mainly as a result of different nitrogen inputs. The Q and Yasso07 models do not have nitrogen processes. As for CENTURY, it is reported that large N input could enhance plant productivity and then increase SOC (Raich et al., 2000). The purpose of the study was to evaluate the performance of soil carbon models against the same SOC data using the same litter input, and therefore only the soil carbon submodel was used and the feedback of nitrogen input to plant productivity was not included in  
470 this study. However, as in the case of drainage discussed above, the original CENTURY incorporates more detailed processes than the relatively simpler soil carbon models, Q and Yasso07, do, and hence the original CENTURY could potentially reproduce a wider range of SOC if it was parameterized in detail.

## 475 5 Conclusions

The process based mathematical models developed for predicting short-term SOC stock changes such as Yasso07, Q, or CENTURY in their current state can predict accurate long-term SOC stocks for most soils. However, for the medium-highly fertile soils the accumulation of stable SOC by models based on extrapolation of initial plant litter decomposition into the long-term leads to un-  
480 derestimation. Therefore, the relationship between the soil nutrient status and the mechanism of soil organo-mineral carbon stabilization needs to be evaluated. We suggest evaluating the mycorrhizal organic nutrient uptake and larger plant biomass/litter production in nutrient rich sites resulting to higher SOC stock accumulation. For the organo-mineral carbon stabilization, we suggest further model development accounting for the soil nutrient status through evaluating the effect of topogra-  
485 phy on sorting of the parent material, and its silt and clay complexes. If models can be further developed to account for the processes that affect the soil organic matter production and stabilization

than the soil carbon stock estimates, needed when GHG inventories are used to estimate emissions and sinks due to land-use change, and soil carbon stock management would be improved.

The estimates of Yasso07 fitted generally better to measurements than those of CENTURY making  
490 the use of the Yasso07 model which requires fewer parameters and less input data more preferable  
over CENTURY. If CENTURY estimates would be scaled from 20 cm up to 1m the underestimation  
with data would improve, although the deviation in fertile soils would be similar. Furthermore when  
running soil carbon models such as those which obtain litter inputs based on current stand measure-  
ments, when past forest stand dynamics are unknown, we suggest using litter inputs from the steady  
495 state forest estimated as 70th percentile of the maximum current state forest biomass for a given  
species, latitude and productivity class. As models heavily depend on the litter input and its quality,  
a more accurate litter input would also improve the soil organic carbon stock estimates.

### Appendix A: Models of fraction of absorbed radiation for actual and steady state forest

The fraction of photosynthetically active absorbed radiation ( $f_{APAR}$ ) for actual state forest was  
500 calculated based on basic tree measurements of Swedish forest inventory data as in Härkönen  
et al. (2010). For the main tree species  $f_{APAR}$  was also well correlated with the stand basal area  
( $r^2$  was 0.85, 0.86, and 0.88 for pine, spruce, and deciduous stands respectively, coefficients of  
regressions in Table A1). The actual state forest  $f_{APAR}$  varied between 0 and maximum close to 1  
(Fig. A1).

505 The steady state forest  $f_{APAR}$  values were assumed to be in range between the median and the  
maximum fraction of actual state forest  $f_{APAR}$  for given species, latitudinal degree, and site pro-  
ductivity class (indicated by the height of largest tress at 100 years of stands age). The steady state  
forest  $f_{APAR}$  values were set to 70th percentile of maximum  $f_{APAR}$  for given species, latitudi-  
nal degree, and site productivity class. We selected 70th percentile out of range from 50th to 95th,  
510 because the modelled soil carbon distributions with the litter input from biomass of  $f_{APAR70}$  best  
agreed with measured soil carbon distributions (Fig. S2). The  $f_{APAR70}$  values specific for pine,  
spruce, and deciduous stands were first modelled by regression models with latitude ( $f_{APAR70LAT}$ )  
(Table A2) and then reduced by the difference between the modelled  $f_{APAR70}$  by regression models  
with productivity class (H100) ( $f_{APAR70H100}$ ) (Table A1) and maximum  $f_{APAR70H100}$  ( $f_{APAR70}$   
515 =  $f_{APAR70LAT} + f_{APAR70H100} - \text{maximum } f_{APAR70H100}$ ). The  $f_{APAR70}$  values equaled the  
 $f_{APAR70LAT}$  values only for the maximum productivity class, otherwise it was reduced.

### Appendix B: Models of forest dry weight biomass ( $\text{kg ha}^{-1}$ ) with $f_{APAR}$ .

We fitted species specific exponential regression models between the biomass components (stem,  
branch, foliage, stump, coarse-roots, fine-roots) of actual state forest and the actual fraction of ab-  
520 sorbed radiation ( $f_{APAR}$ ) (statistics of the regression models in Table B1). The biomass components

derived with allometric models (measured) and those derived with  $f_{APAR}$  models (modeled) showed strong correlations (Fig. B1). In order to model the longterm mean forest biomass “steady state forest biomass” we applied the  $f_{APAR}$  biomass models to the modeled  $f_{APAR70}$  values.

### Appendix C: Models of understory vegetation.

525 We used Swedish forest inventory ground vegetation coverage (%) data visually monitored between 1993 and 2002 on 2440 plots around Sweden with altogether 4472 observations separately for species of forest floor vegetation /or their classes (Table S3). In order to derive the ground vegetation biomass and to apply the coverage/biomass conversion functions (Aleksi Lehtonen, *unpublished results*), we grouped the species coverage observations into five functional types (dwarf-shrubs, 530 herbs, grasses, moss, and lichen) (Table S3). The applied coverage/biomass conversion functions estimated separately the above- and below-ground biomass components for dwarf-shrubs, herbs, and grasses, and total biomass for moss, and lichen.

Except the understory coverage, the forest inventory data also contained basic tree dimensions (diameter and height of trees) and stand variables (species dominance, age, basal area, site productivity 535 class indicated by the height of largest tree at 100 years of stands age), and also we linked the plots by their closest proximity to Swedish Meteorological and Hydrological Institute (SMHI) weather stations with weather data (air temperature, precipitation) and location attributes of the weather stations (latitude, longitude, altitude).

We built linear ground vegetation dry weight biomass ( $\text{kg ha}^{-1}$ ) models in a two level selection of 540 the predictors from stand, weather and location variables. First, we selected the predictors into linear models by using R package “Mass” and its stepwise model selection by exact AIC (Venables and Ripley, 2002). Second, we refined the model by using “relaimpo” R package estimating usefulness (Grömping, 2006), or relative importance for each of the predictors in the model, and by selecting only predictors with relative importance  $\geq 0.1$ . The general form of the models was:

$$545 \quad y_i = a + b_1x_1 + \dots + b_nx_n + \varepsilon, \quad (\text{C1})$$

Where  $y_i$  is the understory dry weight biomass ( $\text{kg ha}^{-1}$ ),  $x_1 \dots x_n$  are the predictors,  $a, b_1 \dots b_n$  are parameters of the  $i^{\text{th}}$  understory functional type (Table C1), and  $\varepsilon$  is the residual error. Scatter plots between the measured coverage derived biomass and modelled dry weight biomass ( $\text{kg ha}^{-1}$ ) of the functional types of ground vegetation are shown on Fig. S9. Statistics of the models are shown 550 in Table C1.

### Code and data availability

The source codes of the Yasso07, Q and CENTURY models used in this paper are available through the supplementary material. Data used in this study can be available directly by contacting the authors.

555 *Acknowledgements.* This work was part of the ~~project~~ [Metla project 7509](#) 'Improving soil carbon estimation of GHG inventory' funded by the Finnish Ministry of the Environment and the Ministry of Agriculture and Forestry-, [and Academy of Finland mobility projects 276300 and 276602](#).

## References

- Adair, E. C., Parton, W. J., Del Grosso, S. J., Silver, W. L., Harmon, M. E., Hall, S. A., Burke, I. C. and Hart,  
560 S. C.: Simple three-pool model accurately describes patterns of long-term litter decomposition in diverse  
climates, *Global Change Biol.*, 14, 2636-2660, 2008.
- [Ågren, G. I., Bosatta, E. and Magill, A. H.: Combining theory and experiment to understand effects of inorganic  
nitrogen on litter decomposition, \*Oecologia\*, 128, 94-98, 2001.](#)
- Ågren, G. I. and Hyvönen, R.: Changes in carbon stores in Swedish forest soils due to increased biomass harvest  
565 and increased temperatures analysed with a semi-empirical model, *For. Ecol. Manage.*, 174, 25-37, 2003.
- Ågren, G., Hyvönen, R. and Nilsson, T.: Are Swedish forest soils sinks or sources for CO<sub>2</sub>—model analyses  
based on forest inventory data, *Biogeochemistry*, 82, 217-227, 2007.
- Amundson, R.: The carbon budget in soils, *Annu. Rev. Earth Planet. Sci.*, 29, 535-562, 2001.
- Averill, C., Turner, B. L. and Finzi, A. C.: Mycorrhiza-mediated competition between plants and decomposers  
570 drives soil carbon storage, *Nature*, 505, 543-545, 2014.
- Berthrong, S. T., Jobbágy, E. G. and Jackson, R. B.: A global meta-analysis of soil exchangeable cations, pH,  
carbon, and nitrogen with afforestation, *Ecol. Appl.*, 19, 2228-2241, 2009.
- Boden, T. A., Marland, G. and Andres, R. J.: Global, regional, and national fossil-fuel CO<sub>2</sub> emissions, Car-  
bon Dioxide Information Analysis Center, Oak Ridge National Laboratory, US Department of Energy, Oak  
575 Ridge, Tenn., USA, 2010. doi 10.3334/CDIAC/00001\_V2010
- Castellano, M. J., Mueller, K. E., Olk, D. C., Sawyer, J. E. and Six, J.: Integrating Plant Litter Quality, Soil  
Organic Matter Stabilization and the Carbon Saturation Concept, *Global Change Biol.*, 2015.
- Clemente, J. S., Simpson, A. J. and Simpson, M. J.: Association of specific organic matter compounds in size  
fractions of soils under different environmental controls, *Org. Geochem.*, 42, 1169-1180, 2011.
- 580 Cools, N., Vesterdal, L., De Vos, B., Vanguelova, E. and Hansen, K.: Tree species is the major factor explaining  
C: N ratios in European forest soils, *For. Ecol. Manage.*, 311, 3-16, 2014.
- Cotrufo, M. F., Wallenstein, M. D., Boot, C. M., Deneff, K. and Paul, E.: The Microbial Efficiency-Matrix  
Stabilization (MEMS) framework integrates plant litter decomposition with soil organic matter stabilization:  
do labile plant inputs form stable soil organic matter?, *Global Change Biol.*, 19, 988-995, 2013.
- 585 Deluca, T. H. and Boisvenue, C.: Boreal forest soil carbon: distribution, function and modelling, *Forestry*, 85,  
161-184, 2012.
- Dungait, J. A. J., Hopkins, D. W., Gregory, A. S. and Whitmore, A. P.: Soil organic matter turnover is governed  
by accessibility not recalcitrance, *Global Change Biol.*, 18, 1781-1796, 2012.
- Falloon, P., Jones, C. D., Ades, M. and Paul, K.: Direct soil moisture controls of future global soil carbon  
590 changes: An important source of uncertainty, *Global Biogeochem. Cycles*, 25, - GB3010, 2011.
- Fan, Z., Neff, J. C., Harden, J. W. and Wickland, K. P.: Boreal soil carbon dynamics under a changing climate:  
A model inversion approach, *Journal of Geophysical Research: Biogeosciences*, 113, - G04016, 2008.
- Fernández-Martínez, M., Vicca, S., Janssens, I. A., Sardans, J., Luyssaert, S., Campioli, M., Chapin III, F.  
S., Ciais, P., Malhi, Y., Obersteiner, M., Papale, D., Piao, S. L., Reichstein, M., Roda, F. and Penuelas, J.:  
595 Nutrient availability as the key regulator of global forest carbon balance, *Nature Clim. Change*, 4, 471-476,  
2014.

[Franklin, O., Högberg, P., Ekblad, A. and Ågren, G. I.: Pine forest floor carbon accumulation in response to N and PK additions: bomb 14C modelling and respiration studies, \*Ecosystems\*, 6, 644-658, 2003.](#)

- Grömping, U.: Relative importance for linear regression in R: the package relaimpo, *Journal of statistical software*, 17, 1-27, 2006.
- 600 Härkönen, S., Pulkkinen, M., Duursma, R. and Mäkelä, A.: Estimating annual GPP, NPP and stem growth in Finland using summary models, *For. Ecol. Manage.*, 259, 524-533, 2010.
- Husson, O.: Redox potential (Eh) and pH as drivers of soil/plant/microorganism systems: a transdisciplinary overview pointing to integrative opportunities for agronomy, *Plant Soil*, 362, 389-417, 2013.
- 605 Kammer, A. and Hagedorn, F.: Mineralisation, leaching and stabilisation of 13C-labelled leaf and twig litter in a beech forest soil, *Biogeosciences*, 8, 2195-2208, doi:10.5194/bg-8-2195-2011, 2011.
- Kirschbaum, M. U. F.: Will Changes in Soil Organic Carbon Act as a Positive or Negative Feedback on Global Warming?, *Biogeochemistry*, 48, 21-51, 2000.
- Kleja, D. B., Svensson, M., Majdi, H., Jansson, P., Langvall, O., Bergkvist, B., Johansson, M., Weslien, P., 610 Truusb, L. and Lindroth, A.: Pools and fluxes of carbon in three Norway spruce ecosystems along a climatic gradient in Sweden, *Biogeochemistry*, 89, 7-25, 2008.
- Lehtonen, A. and Heikkinen, J.: Uncertainty of upland soil carbon sink estimate for Finland, *Canadian Journal of Forest Research*, 45, 1-13, 2015a.
- Lehtonen, A., Palviainen, M., Ojanen, P., Kalliokoski, T., Nöjd, P., Kukkola, M., Penttilä, T., Mäkipää, R., 615 Leppälampi-Kujansuu, J. and Helmisaari, H. -S.: Modelling fine root biomass of boreal tree stands using site and stand variables, *For. Ecol. Manage.*, 2015b.
- Leppälampi-Kujansuu, J., Aro, L., Salemaa, M., Hansson, K., Kleja, D. B. and Helmisaari, H.: Fine root longevity and carbon input into soil from below- and aboveground litter in climatically contrasting forests, *For. Ecol. Manage.*, 326, 79-90, 2014.
- 620 Lindén, A., G.: Swedish Geological Survey report, pp. 10, 2002, <http://resource.sgu.se/produkter/ae/ae118-beskrivning.pdf>
- Liski, J., Tuomi, M. and Rasinmäki, J.: Yasso07 user-interface manual, Finnish Environment Institute, Helsinki, 2009.
- Liski, J., Lehtonen, A., Palosuo, T., Peltoniemi, M., Eggers, T., Muukkonen, P. and Mäkipää, R.: Carbon accumulation in Finland's forests 1922–2004—an estimate obtained by combination of forest inventory data with modelling of biomass, litter and soil, *Ann. For. Sci.*, 63, 687-697, 2006.
- 625 [Manzoni, S., Taylor, P., Richter, A., Porporato, A. and Ågren, G. I.: Environmental and stoichiometric controls on microbial carbon use efficiency in soils, \*New Phytol.\*, 196, 79-91, 2012.](#)
- McCormack, M. L., Crisfield, E., Raczka, B., Schnekenburger, F., Eissenstat, D. M. and Smithwick, E. A.: 630 Sensitivity of four ecological models to adjustments in fine root turnover rate, *Ecol. Model.*, 297, 107-117, 2015.
- Metherell, A. K.: Century: Soil Organic Matter Model Environment: Technical Documentation: Agroecosystem Version 4.0, Colorado State University, 1993.
- Nalder, I. A. and Wein, R. W.: A model for the investigation of long-term carbon dynamics in boreal forests of 635 western Canada: I. Model development and validation, *Ecol. Model.*, 192, 37-66, 2006.

- Olsson, M. T., Erlandsson, M., Lundin, L., Nilsson, T., Nilsson, Å. and Stendahl, J.: Organic carbon stocks in Swedish Podzol soils in relation to soil hydrology and other site characteristics., *Silva Fennica*, 43, 209-222, 2009.
- 640 Ortiz, C., Karlton, E., Stendahl, J., Gärdenäs, A. I. and Ågren, G. I.: Modelling soil carbon development in Swedish coniferous forest soils—An uncertainty analysis of parameters and model estimates using the GLUE method, *Ecol. Model.*, 222, 3020-3032, 2011.
- Ortiz, C. A., Liski, J., Gärdenäs, A. I., Lehtonen, A., Lundblad, M., Stendahl, J., Ågren, G. I. and Karlton, E.: Soil organic carbon stock changes in Swedish forest soils—A comparison of uncertainties and their sources through a national inventory and two simulation models, *Ecol. Model.*, 251, 221-231, 2013.
- 645 Orwin, K. H., Kirschbaum, M. U., St John, M. G. and Dickie, I. A.: Organic nutrient uptake by mycorrhizal fungi enhances ecosystem carbon storage: a model-based assessment, *Ecol. Lett.*, 14, 493-502, 2011.
- Palosuo, T., Foereid, B., Svensson, M., Shurpali, N., Lehtonen, A., Herbst, M., Linkosalo, T., Ortiz, C., Rampazzo Todorovic, G., Marcinkonis, S., Li, C. and Jandl, R.: A multi-model comparison of soil carbon assessment of a coniferous forest stand, *Environmental Modelling & Software*, 35, 38-49, 2012.
- 650 Parton, W. J., Schimel, D. S., Cole, C. V. and Ojima, D. S.: Analysis of Factors Controlling Soil Organic Matter Levels in Great Plains Grasslands, 51, 1173-1179, 1987.
- Parton, W., Ojima, D. and Schimel, D.: Environmental change in grasslands: Assessment using models, *Clim. Change*, 28, 111-141, 1994.
- Raich, J. W., Parton, W. J., Russell, A. E., Sanford Jr, R. L. and Vitousek, P. M.: Analysis of factors regulating ecosystem development on Mauna Loa using the Century model, *Biogeochemistry*, 51, 161-191, 2000.
- 655 Rantakari, M., Lehtonen, A., Linkosalo, T., Tuomi, M., Tamminen, P., Heikkinen, J., Liski, J., Mäkipää, R., Ilvesniemi, H. and Sievänen, R.: The Yasso07 soil carbon model—Testing against repeated soil carbon inventory, *For. Ecol. Manage.*, 286, 137-147, 2012.
- Rapalee, G., Trumbore, S. E., Davidson, E. A., Harden, J. W. and Veldhuis, H.: Soil Carbon stocks and their rates of accumulation and loss in a boreal forest landscape, *Global Biogeochem. Cycles*, 12, 687-701, 1998.
- 660 Rawls, W. J., Pachepsky, Y. A., Ritchie, J. C., Sobecki, T. M. and Bloodworth, H.: Effect of soil organic carbon on soil water retention, *Geoderma*, 116, 61-76, 2003. .
- Rolff, C. and Ågren, G. I.: Predicting effects of different harvesting intensities with a model of nitrogen limited forest growth, *Ecol. Model.*, 118, 193-211, 1999.
- 665 R Core Team R: A language and environment for statistical computing. R Foundation for Statistical Computing, Vienna, Austria. URL <http://www.R-project.org/>, 2014.
- Scharlemann, J. P., Tanner, E. V., Hiederer, R. and Kapos, V.: Global soil carbon: understanding and managing the largest terrestrial carbon pool, *Carbon Management*, 5, 81-91, 2014.
- Schlesinger, W. H.: Carbon Sequestration in Soils, *Science*, 284, 2095-2095, 1999.
- 670 Schmidt, M. W. I., Torn, M. S., Abiven, S., Dittmar, T., Guggenberger, G., Janssens, I. A., Kleber, M., Kogel-Knabner, I., Lehmann, J., Manning, D. A. C., Nannipieri, P., Rasse, D. P., Weiner, S. and Trumbore, S. E.: Persistence of soil organic matter as an ecosystem property, *Nature*, 478, 49-56, 2011.
- Six, J., Conant, R. T., Paul, E. A. and Paustian, K.: Stabilization mechanisms of soil organic matter: Implications for C-saturation of soils, *Plant Soil*, 241, 155-176, 2002.
- 675 SLU, 2011. Markinfo, <http://www-markinfo.slu.se/eng/index.html>



- Smith, P.: An overview of the permanence of soil organic carbon stocks: influence of direct human-induced, indirect and natural effects, *Eur. J. Soil Sci.*, 56, 673-680, 2005.
- Sollins, P., Homann, P. and Caldwell, B. A.: Stabilization and destabilization of soil organic matter: mechanisms and controls, *Geoderma*, 74, 65-105, 1996.
- 680 Stendahl, J., Johansson, M., Eriksson, E., Nilsson, Å. and Langvall, O.: Soil organic carbon in Swedish spruce and pine forests—differences in stock levels and regional patterns, *Silva Fenn.*, 44, 5-21, 2010.
- Svensson, M., Jansson, P. and Kleja, D. B.: Modelling soil C sequestration in spruce forest ecosystems along a Swedish transect based on current conditions, *Biogeochemistry*, 89, 95-119, 2008.
- Therneau, T. M. and Atkinson, E. J.: An introduction to recursive partitioning using the RPART routines, 1997.
- 685 Todd-Brown, K., Randerson, J. T., Hopkins, F., Arora, V., Hajima, T., Jones, C., Shevliakova, E., Tjiputra, J., Volodin, E., Wu, T., Zhang, Q. and Allison, S. D.: Changes in soil organic carbon storage predicted by Earth system models during the 21st century, *Biogeosciences*, 11, 2341-2356, 2014.
- Todd-Brown, K., Randerson, J. T., Post, W. M., Hoffman, F. M., Tarnocai, C., Schuur, E. A. G. and Allison, S. D.: Causes of variation in soil carbon simulations from CMIP5 Earth system models and comparison with
- 690 observations, *Biogeosciences*, 10, 1717-1736, 2013.
- Torn, M. S., Trumbore, S. E., Chadwick, O. A., Vitousek, P. M. and Hendricks, D. M.: Mineral control of soil organic carbon storage and turnover, *Nature*, 389, 170-173, 1997.
- Tuomi, M., Rasinmäki, J., Repo, A., Vanhala, P. and Liski, J.: Soil carbon model Yasso07 graphical user interface, *Environmental Modelling & Software*, 26, 1358-1362, 2011.
- 695 Tuomi, M., Thum, T., Järvinen, H., Fronzek, S., Berg, B., Harmon, M., Trofymow, J. A., Sevanto, S. and Liski, J.: Leaf litter decomposition—Estimates of global variability based on Yasso07 model, *Ecol. Model.*, 220, 3362-3371, 2009.
- Tupek, B., Minkkinen, K., Pumpanen, J., Vesala, T. and Nikinmaa, E.: CH<sub>4</sub> and N<sub>2</sub>O dynamics in the boreal forest—mire ecotone, *Biogeosciences*, 12, 281-297, 2015.
- 700 Wiesmeier, M., Hübner, R., Spörlein, P., Geuß, U., Hangen, E., Reischl, A., Schilling, B., von Lütow, M. and Kögel-Knabner, I.: Carbon sequestration potential of soils in southeast Germany derived from stable soil organic carbon saturation, *Global Change Biol.*, 20, 653-665, 2014.
- Xia, M., Talhelm, A. F. and Pregitzer, K. S.: Fine roots are the dominant source of recalcitrant plant litter in sugar maple-dominated northern hardwood forests, *New Phytol.*, 2015.
- 705 Yurova, A. Y., Volodin, E. M., Agren, G. I., Chertov, O. G. and Komarov, A. S.: Effects of variations in simulated changes in soil carbon contents and dynamics on future climate projections, *Global Change Biol.*, 16, 823-835, 2010.
- Venables, W. N. and Ripley, B. D.: *Modern applied statistics with S-PLUS*, Springer Science & Business Media, 2013.
- 710 Zandonadi, D. B., Santos, M. P., Busato, J. G., Peres, L. E. P. and Façanha, A. R.: Plant physiology as affected by humified organic matter, *Theoretical and Experimental Plant Physiology*, 25, 13-25, 2013.

**Table 1.** Description of the Swedish Forest Soil Inventory (SFSI) data reduction of soil sorting of parent material and humus types; SFSI conversion estimate of soil classes of soil moisture to numerical representation of soil water content according to observations from Tupek et al. (2015); and SFSI conversion estimate of classes to numerical representation of soil texture (sand, silt, and clay content for sediments by Lindén (2002) and for tills by Albert Atterberg’s distribution of the different grain size fractions).

| <b>SORTING PARENT MATERIAL</b> |          | <b>HUMUS TYPE</b> |         | <b>MOISTURE</b> |           |            |
|--------------------------------|----------|-------------------|---------|-----------------|-----------|------------|
| SFSI                           | REDUCED  | SFSI              | REDUCED | SFSI            | SFSI      | NUMERIC    |
| Bedrock                        | Bedrock  | Moder             | No-peat |                 | Water     | Long-term  |
| Poorly sorted sediments        | Unsorted | Mor 1             | No-peat |                 | level (m) | moisture % |
| Tills                          | Unsorted | Mor 2             | No-peat | Dry             | <2        | 10         |
| Well sorted sediments          | Sorted   | Mull              | No-peat | Fresh           | 1-2       | 20         |
|                                |          | Mull-Moder        | Peat    | Fresh-moist     | <1        | 30         |
|                                |          | Peat              | Peat    | Moist           | <0.5      | 50         |
|                                |          | Peat-Mor          | Peat    |                 |           |            |

  

| <b>TEXTURE</b> |                      |        |        |        |        |        |
|----------------|----------------------|--------|--------|--------|--------|--------|
| SFSI           | NUMERIC<br>SEDIMENTS |        |        | TILLS  |        |        |
|                | Sand %               | Silt % | Clay % | Sand % | Silt % | Clay % |
| Bedrock        | 0                    | 0      | 0      | 0      | 0      | 0      |
| Boulder        | 0                    | 0      | 0      | 0      | 0      | 0      |
| Gravel         | 10                   | 0      | 0      | 10     | 0      | 0      |
| Coarse-sand    | 40                   | 5      | 0      | 40     | 5      | 0      |
| Sand           | 80                   | 10     | 0      | 45     | 10     | 0      |
| Fine-sand      | 70                   | 25     | 5      | 55     | 15     | 0      |
| Coarse-silt    | 50                   | 40     | 10     | 65     | 20     | 5      |
| Fine-silt      | 10                   | 75     | 15     | 55     | 35     | 10     |
| Clay           | 0                    | 65     | 35     | 0      | 85     | 15     |
| Peat           | 0                    | 0      | 0      | 0      | 0      | 0      |

**Table 2.** Descriptive characteristics (mean, confidence interval, 1<sup>st</sup>, 50<sup>th</sup>, and 99<sup>th</sup> percentile) of selected variables (n = 3230 samples). The values of the bulk density, cation exchange capacity, base saturation, C/N ratio, and pH are shown only for BC soil horizon (fixed 45–50 cm depth from the ground surface) due to the strong correlation to the total soil carbon stock. The productivity class (H100, m) is an approximation of the site fertility expressed as the height of trees at 100 years of age. Stand and understory biomass, and litter input are modelled values for approximated steady state conditions based on actual state measurements.

|                                                                      | Mean   | CI   | 1 <sup>st</sup> percentile | 50 <sup>th</sup> percentile | 99 <sup>th</sup> percentile |
|----------------------------------------------------------------------|--------|------|----------------------------|-----------------------------|-----------------------------|
| Total soil carbon stock (tC ha <sup>-1</sup> )                       | 93.24  | 1.95 | 17.02                      | 79.68                       | 308.68                      |
| Humus carbon stock (tC ha <sup>-1</sup> )                            | 33.29  | 1.17 | 3.89                       | 22.82                       | 176.66                      |
| Mineral soil carbon stock (tC ha <sup>-1</sup> )                     | 66.82  | 1.7  | 6.92                       | 54.81                       | 273.91                      |
| Depth of humus (cm)                                                  | 10.52  | 0.27 | 1                          | 8                           | 36                          |
| Depth of soil (cm)                                                   | 93.37  | 0.6  | 18                         | 99                          | 99                          |
| Stoniness (%)                                                        | 39.91  | 0.54 | 3.96                       | 42.37                       | 65.05                       |
| Bulk density of BC (g dm <sup>-3</sup> )                             | 1267.1 | 5.5  | 790.55                     | 1294.9                      | 1522.13                     |
| Cation exchange capacity of BC (mmol <sub>c</sub> kg <sup>-1</sup> ) | 23.94  | 1.28 | 1.53                       | 12.33                       | 203.25                      |
| Base saturation of BC (%)                                            | 36.44  | 1.02 | 4.33                       | 25.73                       | 100                         |
| C/N ratio of BC                                                      | 16.5   | 0.35 | 3.33                       | 14.98                       | 62.45                       |
| pH of BC                                                             | 5.17   | 0.02 | 4.36                       | 5.08                        | 7.26                        |
| Silt content (%)                                                     | 19.98  | 0.57 | 0                          | 15                          | 85                          |
| Clay content (%)                                                     | 3.16   | 0.25 | 0                          | 0                           | 35                          |
| Sand content (%)                                                     | 51.25  | 0.63 | 0                          | 55                          | 80                          |
| Long-term soil moisture (%)                                          | 22.36  | 0.2  | 10                         | 20                          | 30                          |
| Mean air temperature (°C)                                            | 4.63   | 0.09 | -0.44                      | 5.34                        | 8.47                        |
| Total precipitation (mm)                                             | 697.87 | 7.13 | 392.54                     | 637.11                      | 1154.55                     |
| Nitrogen deposition (kgN ha <sup>-1</sup> y <sup>-1</sup> )          | 7.17   | 0.14 | 2.35                       | 6.56                        | 17.67                       |
| Productivity class (H100, m)                                         | 23.61  | 0.21 | 12                         | 23                          | 36                          |
| Total stand biomass (tC ha <sup>-1</sup> )                           | 56.02  | 1.39 | 1.34                       | 51.14                       | 156.52                      |
| Total understory biomass (tC ha <sup>-1</sup> )                      | 2.69   | 0.05 | 0.96                       | 2.37                        | 6.02                        |
| Total litterfall input (tC ha <sup>-1</sup> )                        | 3.17   | 0.03 | 1.65                       | 3.07                        | 5.28                        |

**Table 3.** Description of models and data inputs relevant for this study.

| Model           | Yasso07                                                                                                          | Q                                                                                   | CENTURY v. 4.0 soil submodel                                                                                                            |
|-----------------|------------------------------------------------------------------------------------------------------------------|-------------------------------------------------------------------------------------|-----------------------------------------------------------------------------------------------------------------------------------------|
| Time step       | Year                                                                                                             | Year                                                                                | Month                                                                                                                                   |
| Parameters      | General (world wide litter bags)                                                                                 | Seven Swedish regions                                                               | Two forest sites (evergreen and deciduous)                                                                                              |
| Carbon pools    | Labile (acid -, water -, and ethanol-soluble and non-soluble), recalcitrant (humus)                              | Cohorts (foliage, stems, branches, coarse roots, fine roots, "grass"), soil organic | Litter (surface structural and metabolic, belowground str. and met.), surface microbial, soil organic matter (active, slow and passive) |
| Biomass         | Biomass components estimated by allometric biomass functions and provided stand data for litter input estimation |                                                                                     |                                                                                                                                         |
| Litter amount   | Annual or monthly fractions of biomass components (species specific, same total litter inputs for all models)    |                                                                                     |                                                                                                                                         |
| Litter quality  | Litterature based solubilities                                                                                   | Estimated cohorts qualities                                                         | C/N ratios and lignin/N ratios                                                                                                          |
| Temperature air | Annual mean, monthly amplitude                                                                                   | Annual mean                                                                         | Max and min monthly mean                                                                                                                |
| Precipitation   | Monthly total                                                                                                    | –                                                                                   | Monthly total                                                                                                                           |
| Soil properties | –                                                                                                                | –                                                                                   | Bulk density, sand, silt, and clay content                                                                                              |
| Soil depth (m)  | 1                                                                                                                | 1                                                                                   | 0.2                                                                                                                                     |

**Table A1.** Parameter estimates and their standard errors of the  $f_{APAR}$  regressions with the stand basal area (BA,  $\text{m}^2 \text{ha}^{-1}$ ), and the  $f_{APAR70LAT}$  and  $f_{APAR70H100}$  regressions with the latitude (LAT,  $^\circ$ ) and with the productivity class (H100, m) for Scots pine, Norway spruce, and deciduous stands.

| $f_{APAR} = a * BA / (b + BA)$            | a $\pm$ SE                              | b $\pm$ SE                             | c $\pm$ SE                | adj. $R^2$ |
|-------------------------------------------|-----------------------------------------|----------------------------------------|---------------------------|------------|
| pine                                      | 0.996 $\pm$ 0.029                       | 11.754 $\pm$ 0.811                     |                           | 0.85       |
| spruce                                    | 1.167 $\pm$ 0.034                       | 10.668 $\pm$ 0.870                     |                           | 0.86       |
| deciduous                                 | 1.129 $\pm$ 0.064                       | 7.407 $\pm$ 1.149                      |                           | 0.88       |
| $f_{APAR70LAT} = LAT / (a + b * LAT) + c$ |                                         |                                        |                           |            |
| pine                                      | -9.976e+03 $\pm$ 3.691e+03 <sup>a</sup> | 1.430e+02 $\pm$ 5.416e+01 <sup>b</sup> | 7.220e-01 $\pm$ 1.819e-02 | 0.92       |
| spruce                                    | -2.689e+03 $\pm$ 3.507e+03 <sup>c</sup> | 3.533e+01 $\pm$ 5.025e+01 <sup>d</sup> | 9.654e-01 $\pm$ 9.221e-02 | 0.74       |
| $f_{APAR70LAT} = a + b * LAT$             |                                         |                                        |                           |            |
| deciduous                                 | 1.363 $\pm$ 0.282                       | -0.009 $\pm$ 0.005 <sup>e</sup>        |                           | 0.26       |
| $f_{APAR70H100} = a * e^{(b/H100)}$       |                                         |                                        |                           |            |
| pine                                      | 0.85565 $\pm$ 0.01917                   | -5.22016 $\pm$ 0.40807                 |                           | 0.89       |
| spruce                                    | 0.96726 $\pm$ 0.01009                   | -2.85354 $\pm$ 0.21634                 |                           | 0.86       |
| deciduous                                 | 0.93991 $\pm$ 0.02331                   | -2.63462 $\pm$ 0.50325                 |                           | 0.51       |

$p < 0.001$  for all parameters except for <sup>a</sup> 0.023, <sup>b</sup> 0.024, <sup>c</sup> 0.461, <sup>d</sup> 0.498, and <sup>e</sup> 0.076.

**Table B1.** Parameter estimates and their standard errors for the coefficients of the dry weight biomass ( $\text{kg ha}^{-1}$ ) models with the fraction of absorbed radiation ( $y = ab^{f_{APAR}}$ ) for Scots pine, Norway spruce, and deciduous stands.

| $y = ab^{f_{APAR}}$ | species   | $a \pm \text{SE}$ | $b \pm \text{SE}$ | $adj. R^2$ |
|---------------------|-----------|-------------------|-------------------|------------|
| branch              | pine      | 610.23±21.043     | 121.592±5.967     | 0.917      |
|                     | spruce    | 877.265±34.535    | 54.157±2.457      | 0.918      |
|                     | deciduous | 289.719±26.464    | 155.506±15.838    | 0.892      |
| fineroot            | pine      | 422.031±12.675    | 20.51±0.914       | 0.836      |
|                     | spruce    | 316.675±13.816    | 15.186±0.78       | 0.799      |
|                     | deciduous | 452.632±27.715    | 14.499±1.032      | 0.823      |
| foliage             | pine      | 361.428±24.095    | 86.091±8.223      | 0.714      |
|                     | spruce    | 766.324±40.277    | 33.323±2.033      | 0.827      |
|                     | deciduous | 141.11±28.347     | 70.629±15.992     | 0.56       |
| root                | pine      | 703.163±26.166    | 183±9.62          | 0.918      |
|                     | spruce    | 628.686±32.37     | 113.435±6.665     | 0.903      |
|                     | deciduous | 358.635±33.267    | 149.85±15.506     | 0.888      |
| stem and bark       | pine      | 1793.215±83.818   | 253.676±16.658    | 0.889      |
|                     | spruce    | 974.029±72.348    | 229.024±19.259    | 0.856      |
|                     | deciduous | 971.587±97.632    | 160.858±18.015    | 0.876      |
| stump               | pine      | 231.701±10.273    | 214.429±13.394    | 0.893      |
|                     | spruce    | 170.77±10.331     | 129.219±8.907     | 0.877      |
|                     | deciduous | 79.779±8.388      | 215.511±25.165    | 0.874      |

$p < 0.001$  for all parameters.

**Table C1.** Parameter estimates and their standard errors for the coefficients of the forest ground vegetation dry weight biomass ( $W$ ,  $\text{kg ha}^{-1}$ ) models (Eq. C1) for functional types (1-dwarfshrubs, 2-herbs, 3-grasses, 4-mosses and 5-lichens) with intercept (a) and n number of predictors (b1- age (years), b2 – basal area ( $\text{m}^2 \text{ha}^{-1}$ ), b3 – annual air temperature ( $^{\circ}\text{C}$ ), b4 - latitude ( $^{\circ}$ ), b5 – H100 (height of trees at 100 years of age, m), b6 – H100 of spruce trees (m), b7 – H100 of pine trees (m), b8- pine dominance (0/1), b9-spruce dominance (0/1)). For the latin names of species included into functional types see Table S3.

| W            |       | a $\pm$ SE        | b1 $\pm$ SE      | b2 $\pm$ SE      | b3 $\pm$ SE                  | b4 $\pm$ SE     | b5 $\pm$ SE      | b6 $\pm$ SE      | b7 $\pm$ SE     | b8 $\pm$ SE      | b9 $\pm$ SE     | adj. $R^2$ |
|--------------|-------|-------------------|------------------|------------------|------------------------------|-----------------|------------------|------------------|-----------------|------------------|-----------------|------------|
| Above-ground | 1     | 24.28 $\pm$ 0.32  | 0.13 $\pm$ 0.01  | -0.43 $\pm$ 0.02 |                              |                 |                  |                  |                 | 7.13 $\pm$ 0.33  |                 | 0.29       |
|              | 2     | -82.13 $\pm$ 6.8  |                  |                  | -0.1 $\pm$ 0.1 <sup>a</sup>  | 1.23 $\pm$ 0.1  |                  | 0.77 $\pm$ 0.03  |                 |                  |                 | 0.12       |
|              | 3     | 4.07 $\pm$ 0.30   |                  | -0.16 $\pm$ 0.01 |                              |                 |                  | 0.27 $\pm$ 0.01  |                 | -1.36 $\pm$ 0.15 |                 | 0.21       |
|              | 4     | 32.9 $\pm$ 0.62   |                  |                  |                              |                 | -0.78 $\pm$ 0.04 |                  | 0.48 $\pm$ 0.06 | 3.66 $\pm$ 0.3   | 5.76 $\pm$ 0.29 | 0.22       |
|              | 5     | 19.91 $\pm$ 0.57  |                  | -0.13 $\pm$ 0.01 |                              |                 |                  | -0.45 $\pm$ 0.02 |                 | 6.31 $\pm$ 0.29  |                 | 0.25       |
|              | total | 43.68 $\pm$ 0.29  | 0.12 $\pm$ 0.01  | -0.41 $\pm$ 0.01 |                              |                 |                  |                  |                 | 6.34 $\pm$ 0.3   |                 | 0.30       |
| Below-ground | 1     | -256.3 $\pm$ 3.5  | 0.1 $\pm$ 0.01   | -0.35 $\pm$ 0.02 |                              | 5.05 $\pm$ 0.06 |                  |                  |                 | 8.56 $\pm$ 0.35  |                 | 0.75       |
|              | 2     | -89.34 $\pm$ 7.85 |                  |                  | -0.03 $\pm$ 0.1 <sup>b</sup> | 1.4 $\pm$ 0.12  |                  | 0.78 $\pm$ 0.04  |                 | -4.97 $\pm$ 0.27 |                 | 0.19       |
|              | 3     | 5.97 $\pm$ 0.37   |                  | -0.19 $\pm$ 0.01 |                              |                 |                  | 0.32 $\pm$ 0.01  |                 | -1.78 $\pm$ 0.19 |                 | 0.21       |
|              |       | total             | -251.9 $\pm$ 3.3 |                  | -0.2 $\pm$ 0.01              |                 | 5.15 $\pm$ 0.05  |                  |                 |                  |                 |            |
| Total        |       | -222.7 $\pm$ 4.0  | 0.12 $\pm$ 0.01  | -0.44 $\pm$ 0.02 |                              | 4.9 $\pm$ 0.07  |                  |                  |                 |                  |                 | 0.67       |

$p < 0.001$  for all parameters except for <sup>a</sup> $p = 0.44$ , and <sup>b</sup> $p = 0.84$ .

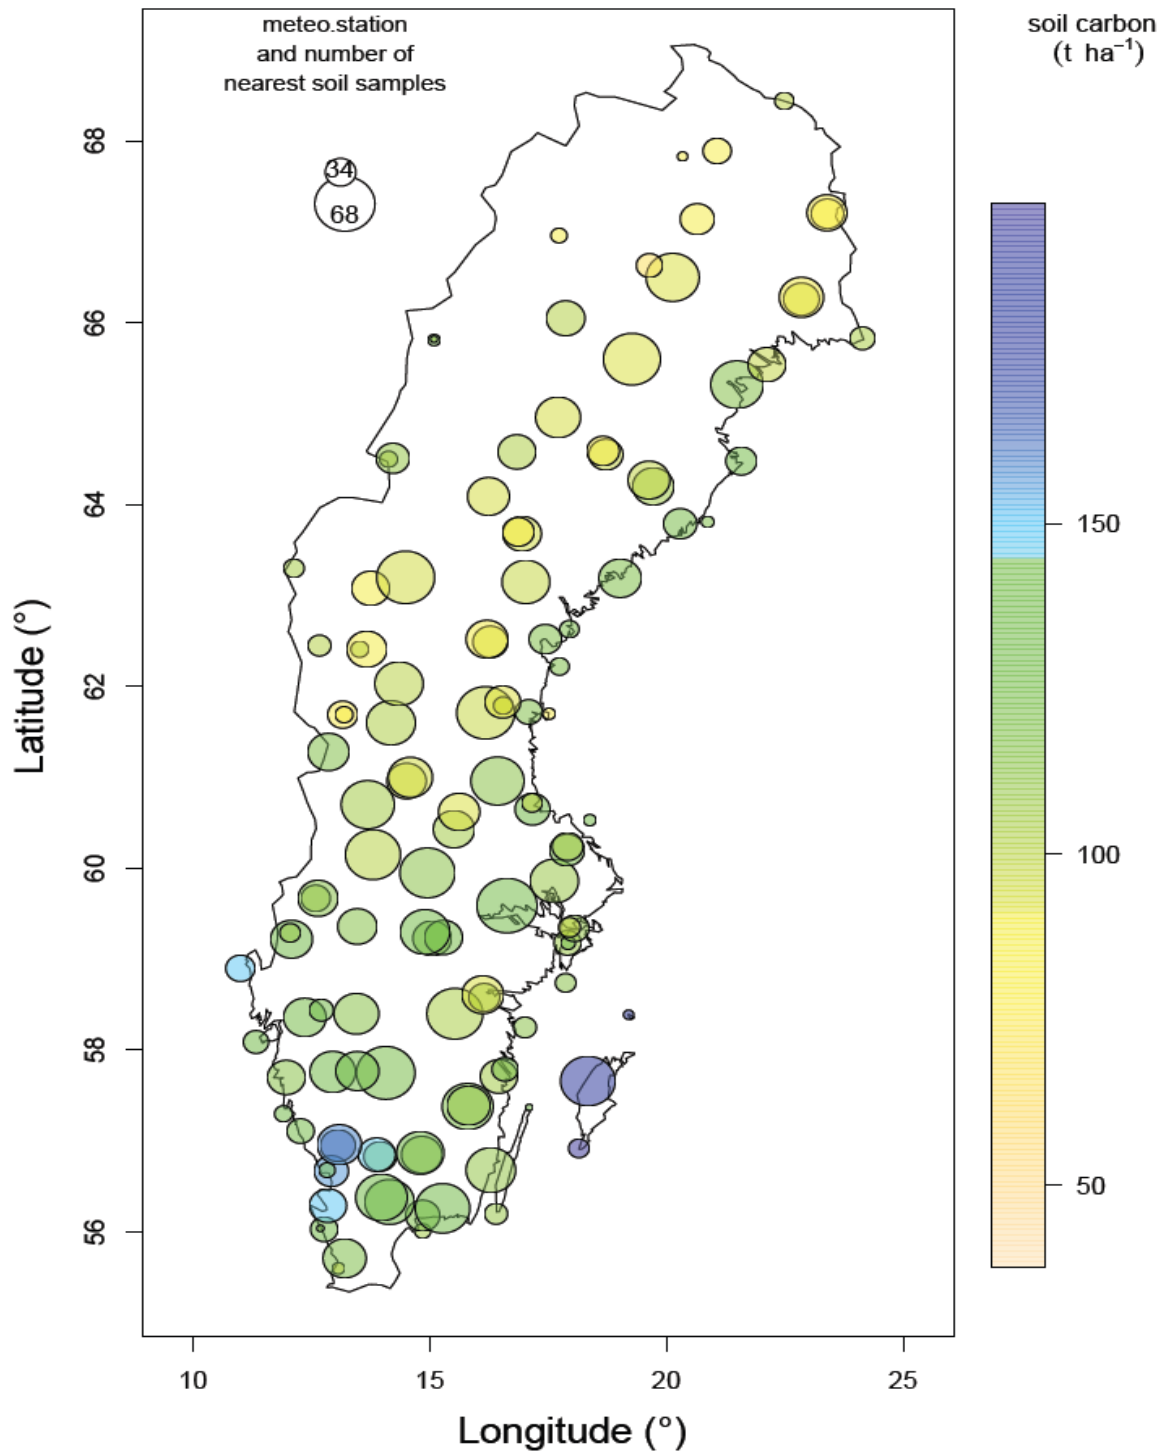

**Figure 1.** Geographical locations of meteorological stations with corresponding number of nearest soil samples (n, size of the circle) and their mean measured soil organic carbon stock (tC ha<sup>-1</sup>, color of the circle) across Sweden.



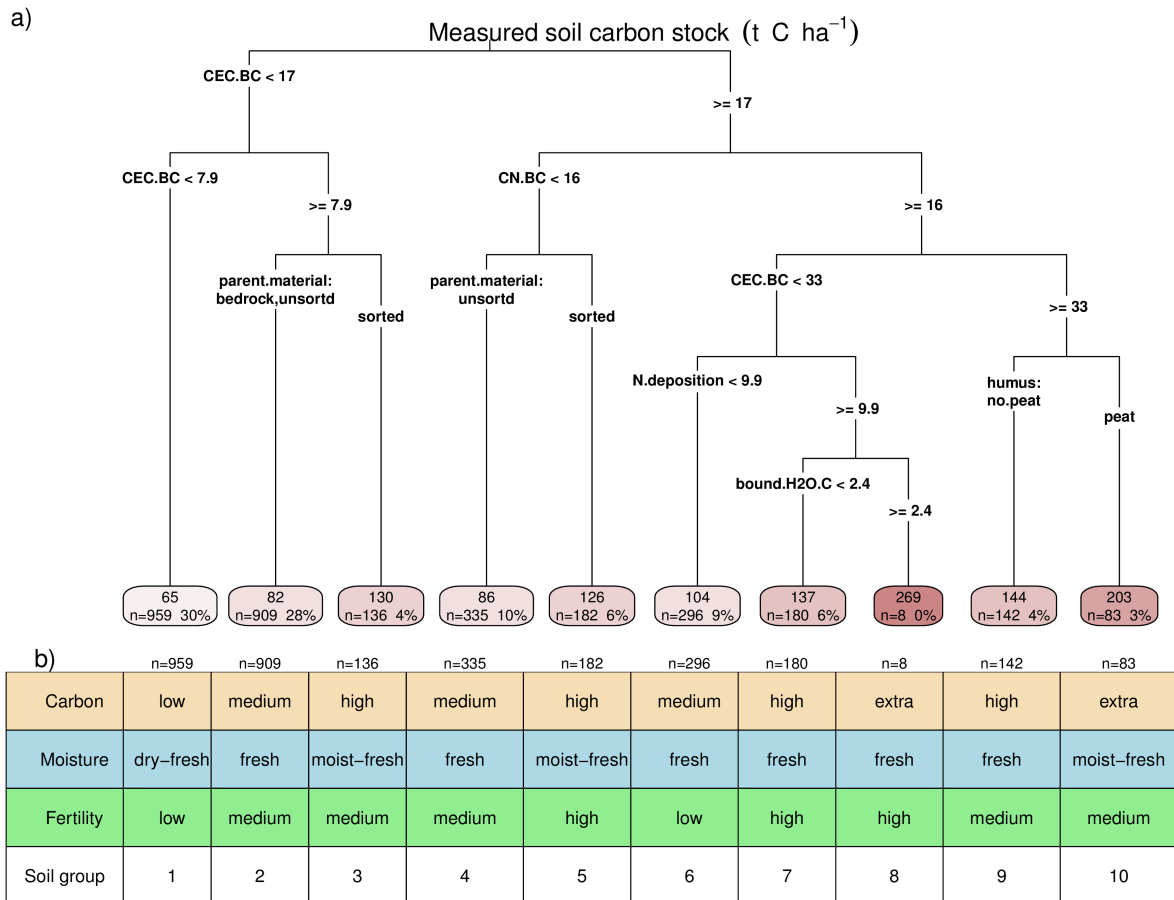

**Figure 2.** a) Classification/regression tree for the measured soil carbon stock ( $\text{tC ha}^{-1}$ ), soil physicochemical properties and site environmental characteristics; the cation exchange capacity of BC horizon (CEC.BC, ( $\text{mmol}_c \text{kg}^{-1}$ )), the C/N ratio (CN.BC), the nitrogen deposition (N.deposition  $\text{kgN ha}^{-1} \text{y}^{-1}$ ), the highly bound soil water of C horizon (bound.H2O.C, %), and soil class variables as type of sorted or unsorted soil parent material and humus type. Note that variables used to calculate the soil carbon stock (bulk density, carbon content, depth, and stoniness) were excluded from the regression tree analysis. The values in the leaves of the tree show for the distinct environmental conditions mean soil carbon stock ( $\text{tC ha}^{-1}$ ), number and percentage of samples. b) The interpretation of 10 physicochemical soil groups of the regression tree model into the levels of carbon, soil moisture, and fertility roughly increasing from left to right.

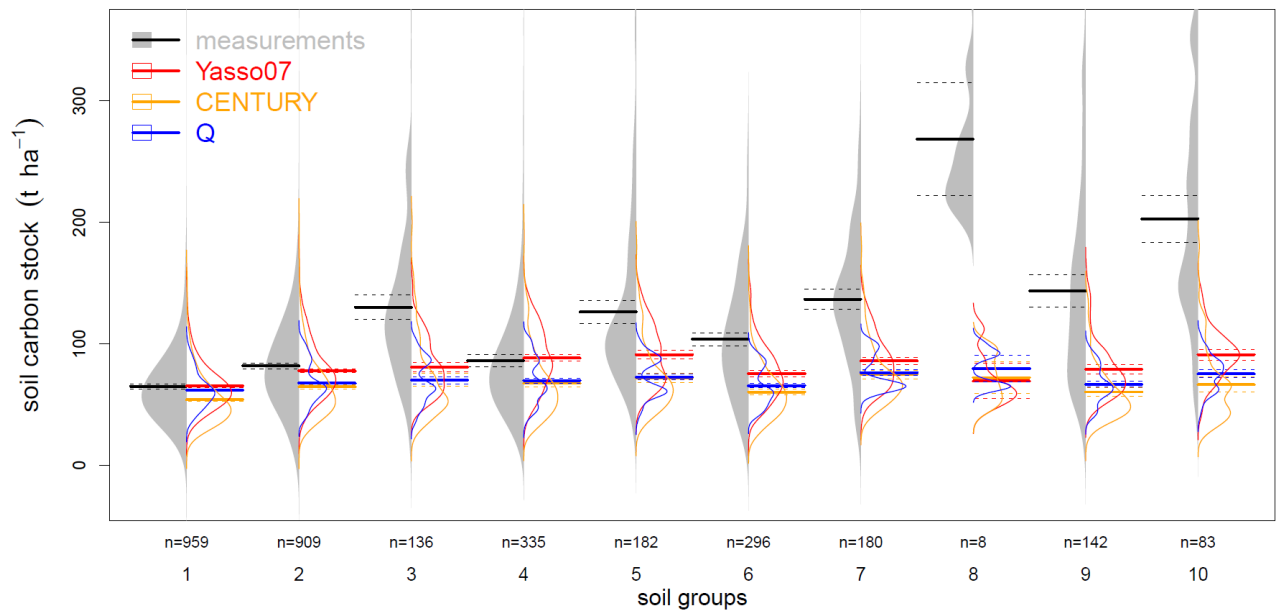

**Figure 3.** Bean plot of density functions for 10 physicochemical groups of the soil carbon (tC ha<sup>-1</sup>) measurements (grey fill) and estimates simulated by the soil carbon models Yasso07, CENTURY, and Q with the litter input derived from the steady state forest. The thin lines are the density distributions. The thick lines are the group means and dashed lines are their confidence intervals. The n is number of samples. For description of group levels of SOC stocks, moisture, and fertility see Fig.2 and Table S1.

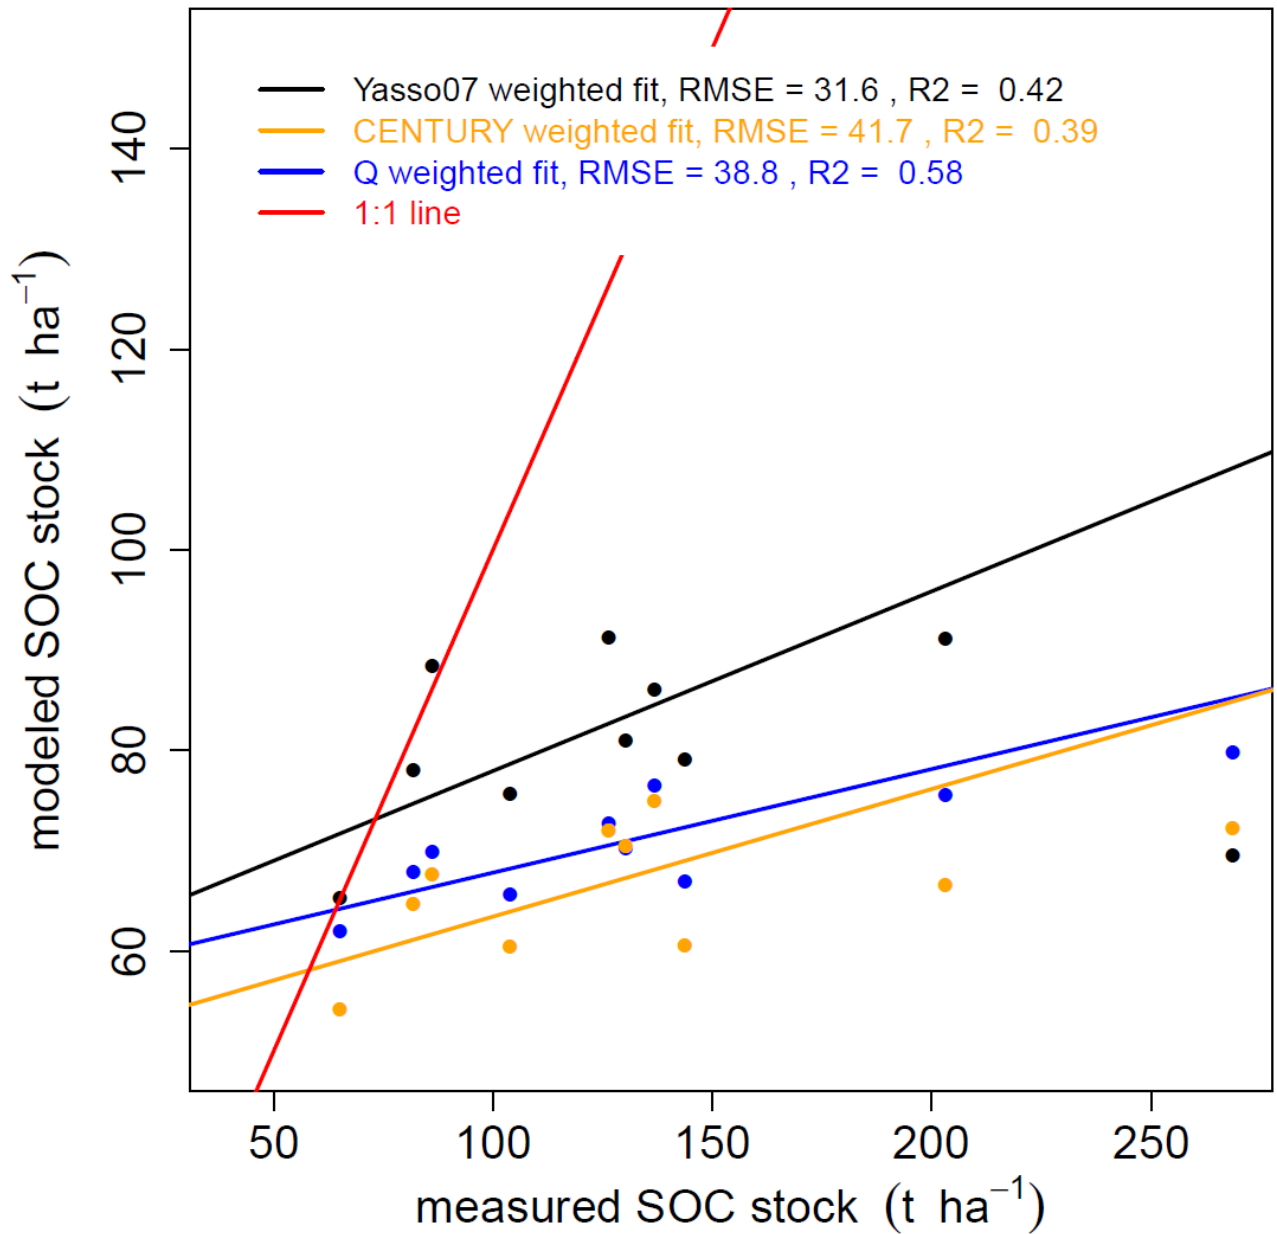

**Figure 4.** Scatter plot between mean measured and mean modeled soil organic carbon stocks (tC ha<sup>-1</sup>) for 10 physicochemical groups for Yasso07, CENTURY and Q models. Data were fitted with weighted linear regression (lines). The number of samples in each group was used as weights for fitting and also as weights for the weighted mean of squared differences between the modeled and measured values (MSE, tC ha<sup>-1</sup>). The RMSE is the square root of MSE. The  $r^2$  is the proportion of explained variance.

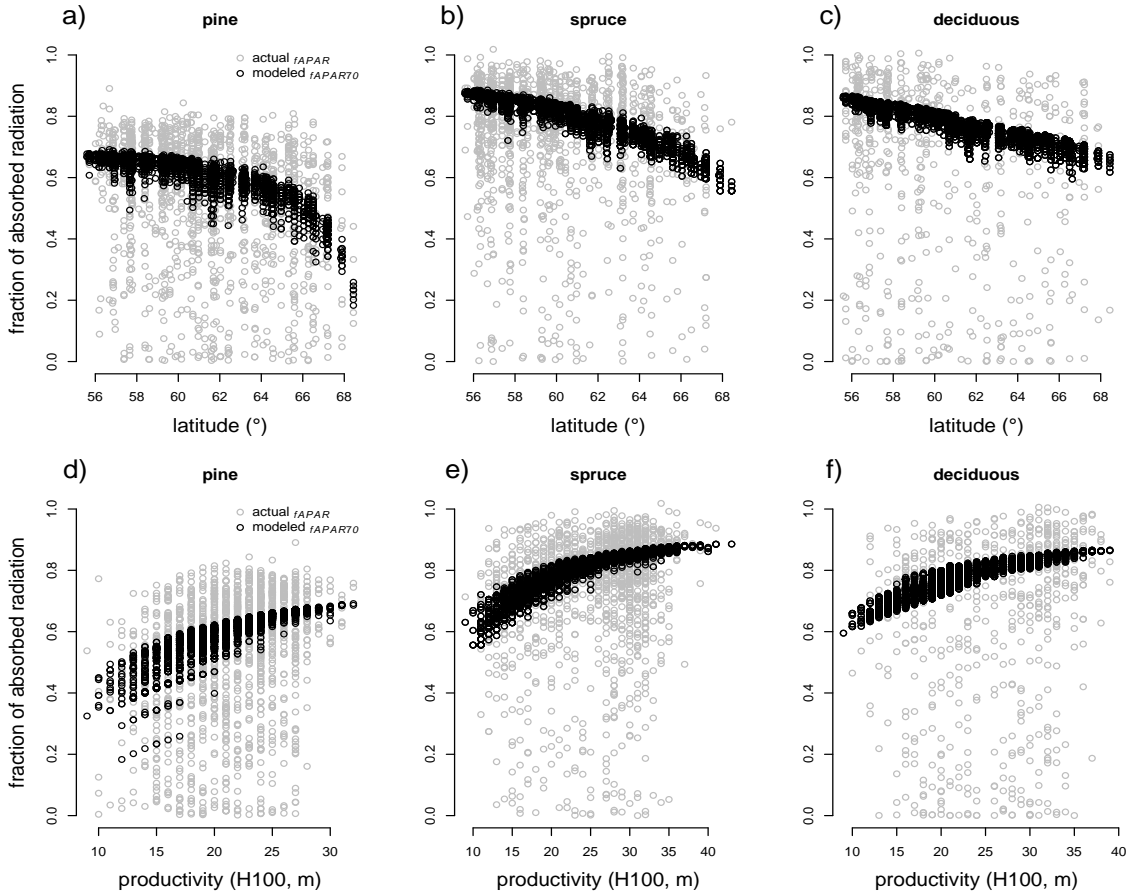

**Figure A1.** Actual state fraction of absorbed radiation ( $f_{APAR}$ , estimated as in Härkönen et al., 2010) (measured actual  $f_{APAR}$ ) and steady state  $f_{APAR}$  (modeled  $f_{APAR70}$ ) which was set to 70th percentile of maximum  $f_{APAR}$  for given species, latitudinal degree, and site productivity class. Panels a), b), and c) show relation between  $f_{APAR}$  and latitude ( $^{\circ}$ ) for forest stands dominant by Scots pine, Norway spruce and deciduous species, whereas panels d), e), and f) show relation between  $f_{APAR}$  and site productivity class (H100, height of dominant trees at 100 years in meters).

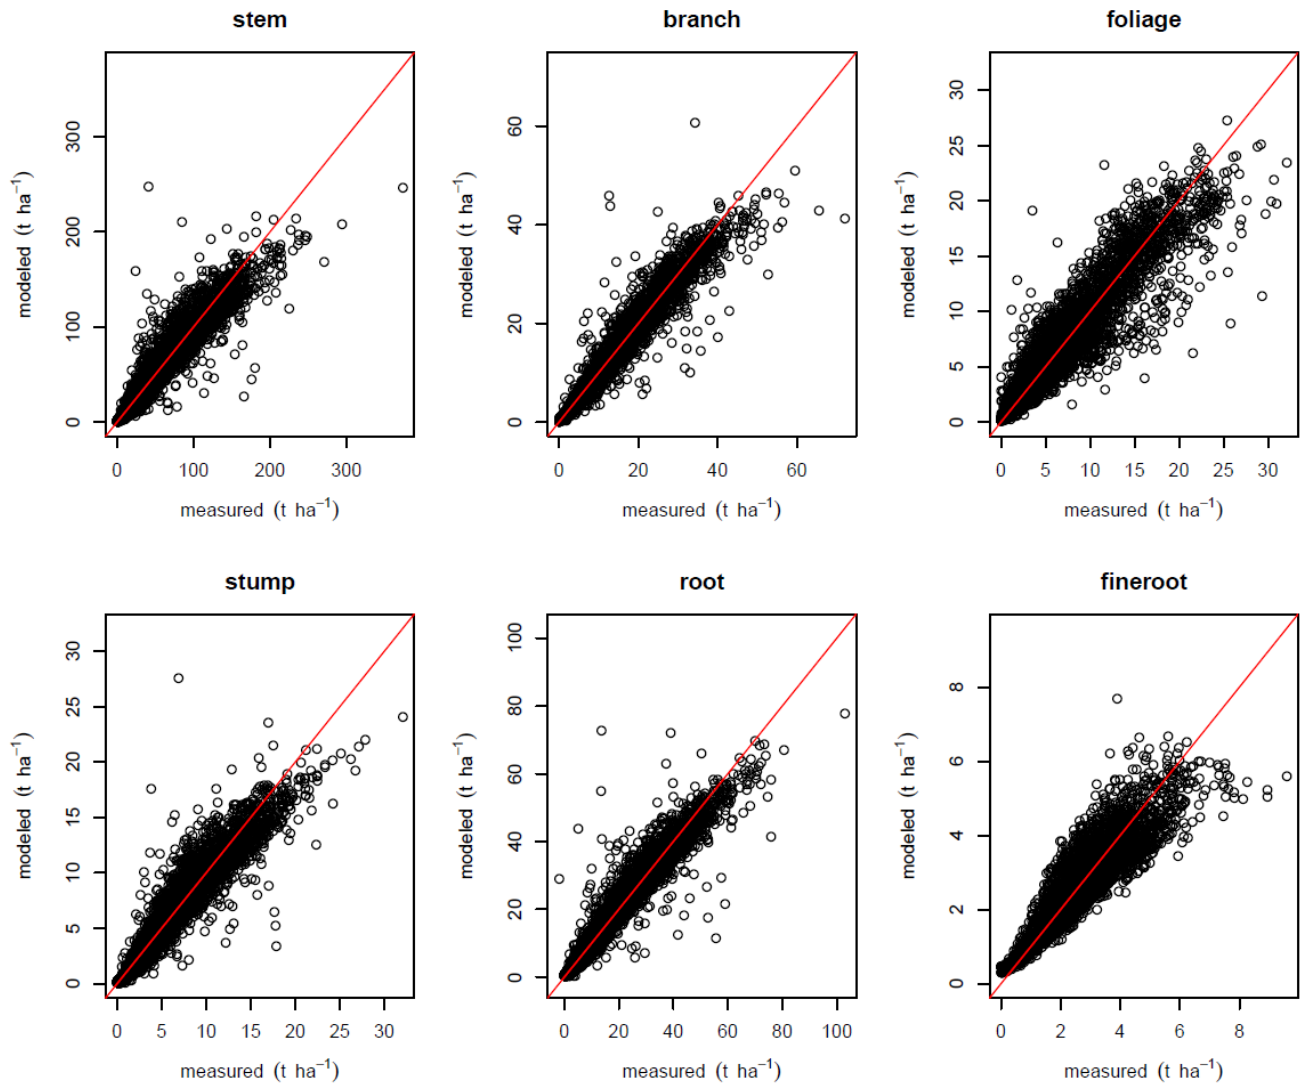

**Figure B1.** Scatter plots for the dry weight tree biomass components ( $W$ ,  $\text{kg ha}^{-1}$ ) between “measured” (estimated based on basic tree stand dimensions and biomass models) and “modelled” (estimated based on fraction of absorbed radiation).
