# Supplementary material for: Underestimation of boreal soil carbon stocks by mathematical soil carbon models linked to soil nutrient status
Source: Copernicus journal article supplement (doi:10.5194/bg-2015-657), 2016-01-18
Supplement: Supplementary file [file bg-2015-657-AC3-supplement.pdf]

# Underestimation of boreal soil carbon stocks by mathematical soil carbon models linked to soil nutrient status

B. Ľupek<sup>1</sup>, C. A. Ortiz<sup>2</sup>, S. Hashimoto<sup>3</sup>, J. Stendahl<sup>2</sup>, J. Dahlgren<sup>4</sup>, E. Karlton<sup>2</sup>,  
and A. Lehtonen<sup>1</sup>

<sup>1</sup>Natural Resources Institute Finland, P.O. Box 18, 01301 Vantaa, Finland

<sup>2</sup>Swedish University of Agricultural Sciences, P.O. Box 7014, 75007 Uppsala, Sweden

<sup>3</sup>Forestry and Forest Products Research Institute, Tsukuba, Ibaraki 305-8687, Japan

<sup>4</sup>Swedish University of Agricultural Sciences, Skogsmarksgränd, 90183 Umeå, Sweden

*Correspondence to:* B. Ľupek (boris.tupek@luke.fi), A. Lehtonen (aleksi.lehtonen@luke.fi)

**Abstract.** Inaccurate estimate of the largest terrestrial carbon pool, soil organic carbon (SOC) stock, is the major source of uncertainty in simulating feedback of climate warming on ecosystem-atmosphere carbon exchange by process based ecosystem and soil carbon models. Although the models need to simplify complex environmental processes of soil carbon sequestration, in a large  
5 mosaic of environments a missing key driver could lead into a modelling bias in predictions of SOC stock change.

We aimed to evaluate SOC stock estimates of process based models (Yasso07, Q, and CENTURY  
~~) against the soil sub-model v. 4) against massive~~ Swedish forest soil inventory ~~data-dataset~~ (3230  
10 samples) organized by recursive partitioning method into distinct soil groups with underlying SOC stock development linked to physicochemical conditions.

~~The Yasso07 and Q models that used only climate and litterfall input data and ignored soil properties generally agreed with two third of measurements~~  
For two thirds of measurements all models predicted accurate SOC stock levels regardless the detail of input data e.g. whether they ignored or included soil properties. However, in fertile sites with high ~~nitrogen-N~~ deposition, high  
15 cation exchange capacity, or moderately increased soil water content, Yasso07 and Q ~~models~~ underestimated SOC stocks. ~~Accounting for soil texture (clay, silt, and sand content) and structure (bulk density) in CENTURY model showed no improvement on carbon stock estimates, as CENTURY deviated in similar manner~~  
In comparison to Yasso07 and Q, including site specific soil characteristics (e. g. clay content and topsoil mineral N) by CENTURY improved SOC stock estimates for sites with  
20 high clay content, but not for sites with high N deposition.

Our analysis suggested that the soils with poorly predicted SOC stocks, as characterized by the high nutrient status and well sorted parent material, indeed have had other predominant drivers of SOC stabilization lacking in the models presumably the mycorrhizal organic uptake and organo-mineral stabilization processes. Our results imply that the role of soil nutrient status as regulator of organic

25 matter mineralization has to be re-evaluated, since correct steady state SOC stocks are decisive for  
predicting future SOC change [and soil CO<sub>2</sub> efflux](#).

## 1 Introduction

In spite of the historical net carbon sink of boreal soils, 500 Pg of carbon since the last ice age  
(Rapalee et al., 1998; DeLuca and Boisvenue 2012; Scharlemann et al., 2014), boreal soils could be-  
30 come a net source of carbon to the atmosphere as a result of long-term climate warming (Kirschbaum  
2000; Amundson 2001). They have the potential to release larger quantities of carbon than all an-  
thropogenic carbon emissions combined (337 Pg) (Boden et al., 2010). In order to preserve the soil  
carbon pool and to utilize the soil carbon sequestration potential to mitigate anthropogenic CO<sub>2</sub>  
emissions, mitigation strategies of climate forcing aim to improve soil organic matter management  
35 (Schlesinger 1999; Smith 2005; Wiesmeier et al., 2014).

Supporting soil management decisions requires an accurate quantification of spatially variable soil  
organic carbon (SOC) stock and SOC stock changes (Scharlemann et al., 2014). The initial level of  
SOC stock is essential in order to estimate SOC stock changes (Palosuo et al., 2012, Todd-Brown  
et al., 2014), especially when estimating carbon emissions due to land-use change e.g. afforestation  
40 of grasslands (Berthrong et al., 2009). Process-oriented soil carbon models like CENTURY, Roth-C,  
Biome-BCG, ORCHIDEE, JSBACH, ROMUL, Yasso07 and Q are important tools for predicting  
SOC stock change, but there are also risks for poor predictions (Todd-Brown et al., 2013, DeLuca  
and Boisvenue 2012). The models need further validation and improvement as they show poor spatial  
agreement on fine scale and moderate agreement on regional scale against SOC stock data (Todd-  
45 Brown et al., 2013; Ortiz et al., 2013). Despite the potentially quantitative importance of CO<sub>2</sub> emis-  
sions the expected change will be small in relation to the SOC stock. Therefore, the uncertainty  
of measurements and/or model estimates could prevent conclusions on SOC stock changes (Palosuo  
et al., 2012; Ortiz et al., 2013; Lethonen et al., 2015a) especially for the soils with largest SOC stocks  
which are the most sensitive to carbon loss. Beside large uncertainties, the poor agreement between  
50 the modelled and measured SOC stocks (Todd-Brown et al., 2013) could also indicate missing biotic  
or abiotic drivers of long-term carbon storage (Schmidt et al., 2011; Averill et al., 2014).

For example ignoring the essential role of soil nutrient availability in ecosystem carbon use ef-  
ficiency (Fernández-Martínez et al., 2014) could lead to missing important controls of plant litter  
production and soil organic matter stabilization mechanisms. Soil nutrient status is linked to the  
55 mobility of nutrients in the water solution (Husson et al., 2013), production, quality and microbial  
decomposition of plant litter (Orwin et al., 2011), and formation of the soil organic matter (SOM).  
The SOM affects soil nutrient status by recycling of macronutrients (Husson et al., 2013), and water  
retention and water availability (Rawls et al., 2003).

In spite of state of the art soil carbon modelling based on the amount and quality of plant litter  
60 “recalcitrance”, affected by climate and/or soil properties as in the Yasso07, Q and CENTURY  
models, these type of process based models do not include mechanisms for SOM stabilization by a)  
the organic nutrient uptake by mycorrhizal fungi; b) humic organic carbon interactions with silt-clay  
minerals; and c) the inaccessibility of deep soil carbon and carbon in soil aggregates to soil biota  
(Orwin et al., 211; Sollins et al., 1996; Torn et al., 1997; Six et al., 2002; Fan et al., 2008; Dungait  
65 et al., 2012; Clemente et al., 2011). Although the models do not contain aforementioned mechanisms  
and controls for changes in SOM stabilization processes, they have been parameterized using a wide  
variety of datasets and can treat soil biotic, physicochemical and environmental changes implicitly.  
The Yasso07 model (Tuomi et al., 2009, 2011) is an advanced forest soil carbon model and it is used  
for Kyoto protocol reporting of changes in soil carbon amounts for the United Nations Framework  
70 Convention on Climate Change (UNFCCC) by European countries e.g. Austria, Finland, Norway,  
and Switzerland. The Q model (Ågren et al., 2007) is a mechanistic litter decomposition model  
developed in Sweden and used e.g. to compare results produced with Swedish national inventory data  
(Stendahl et al., 2010, Ortiz et al., 2011) and also with other models at national or global scales (Ortiz  
et al., 2013; Yurova et al., 2010). The CENTURY model (Parton et al., 1987, 1994, Adair et al., 2008)  
75 is one of the most widely applied models and it is used for soil carbon reporting to UNFCCC by  
Canada, Japan, and USA. Although individual parameters and functions vary, mathematical models  
such as Yasso07, Q and CENTURY have similar structures. For example, these models are driven  
by the decomposition rates of litter input and soil organic matter (SOM). Decomposing litter and  
SOM is divided into pools based on litter quality, and its transfer from one pool to another is apart  
80 from model functions and parameters affected by temperature (Q) and/or water (Yasso07), and/or  
soil texture and structure (CENTURY). The Q model does not include explicit moisture function,  
whereas for the Yasso07 and CENTURY models precipitation ~~effects~~-affects decomposition (Tuomi  
et al., 2009; Adair et al., 2008). On the other hand, the models do not explicitly or by default include  
mechanisms that reduce decomposition by excessive precipitation/moisture (Falloon et al., 2011).

85 We hypothesized that (1) soil carbon estimates of the Yasso07, Q, and CENTURY models would  
deviate for soils where SOC stabilization processes not implicitly accounted by the models are pre-  
dominant, (2) the Yasso07 and Q models ignoring soil properties would fail on the nutrient rich sites  
of South-West coast of Sweden and on occasionally paludified clay and silt soils, and (3) the CEN-  
TURY model outperforms the Yasso07 and Q models due to fact that it includes soil properties as  
90 input variables.

We grouped Swedish forest soil inventory data into homogenous groups with specific soil physic-  
ochemical conditions using regression tree and recursive partitioning modelling methods. After that  
we ran the models into a steady state with a litter input which was derived from the Swedish forest  
inventory. Thereafter we compared the model estimates against data by groups that were obtained

95 from the regression tree model. In discussion we address the reasons why the models deviate and indicate directions of further improvements.

## 2 Material and methods

### 2.1 Measurements

We analysed data from the Swedish forest soil inventory (SFSI) which is a stratified national grid survey of vegetation and physicochemical properties of soils (SLU, 2011, Olsson et al., 2009). All analysis was done using R software for statistical computing and graphics (R core team 2014). The soil data were identical to dataset used in Stendahl et al. (2010). We restricted our sample plots to minerogenic soils since the Q, Yasso07, and CENTURY models were not developed for use on peat soils, and only to plots for forest land use with Swedish forest inventory data (SFI). We also excluded samples with total ~~soil organic carbon (SOC)~~ SOC stock below 2.8 and above 470.5 ( $\text{tC ha}^{-1}$ ), i.e. samples with SOC stock below 0.01 and above 99.9 percentile. Measurement data originated from the 1993 to 2002 which constitute a full inventory, and from 2020 sample plots located around Sweden, and in total it including 3230 samples. For each sample plot the weather (years 1961-2011) and N deposition (years 1999-2001) data was retrieved from the nearest stations of Swedish Meteorological and Hydrological Institute (SMHI) network (Fig. 1). The plots which were linked by the closest distance to the given weather station had the same weather and N deposition data, and the number of soil samples per station ranged between 10 and 70. The mean total SOC stock of samples corresponding to weather stations ranged between 40 and 200 ( $\text{tC ha}^{-1}$ ), and the SOC stock level increased from the South to North of Sweden (Fig. 1).

115 Each sample plot contained categorical data from the field survey on the sorting of soil parent material, humus type, soil texture, and soil moisture. In our analysis we reduced categorical classes by basing them on the sorting of soil parent material and humus type (Table 1). We determined numeric values for silt, clay, and sand content from soil texture categories by Albert Atterberg's distribution of the different grain size fractions in tills and by Lindén's (2002) distributions for sediments (Table 1). We also determined numeric values of volumetric soil water content (SWC) from categorical field data classified according to the depth of the ground water level (WL) ~~and the observations of Tupek et al. (2015)~~ (Table 1).

As typical for soil carbon inventories, the variation of data was large (Table 2). For example, the mean total SOC stock of all samples was 93 ( $\text{tC ha}^{-1}$ ) while 1st and 99th percentiles were 17 and 309 (Table 2). The mean SOC stock was 33.3 and 66.8 ( $\text{tC ha}^{-1}$ ) for the humus horizon and the mineral soil. The mean values of cation exchange capacity (CEC) 23.9 ( $\text{mmol}_c \text{kg}^{-1}$ ), the base saturation 36.4%, and the C/N ratio 16.5 indicated conditions of medium fertility, although the soils were mostly acidic (mean pH was 5.2). The mean prevailing soil water content (22.3) was typical for the well-drained forest soils. The mean annual temperatures ranged from below 0 to above 8 °C,

130 and annual precipitation varied between 392 and 1154 mm (Table 2). Total SOC stock for all the samples generally increased for peat and peat like humus forms, for well sorted sediments, for soils with high fraction of silt and clay and with increasing soil moisture (Fig. S1).

### 2.1.1 Biomass and litterfall estimates

Forest stand biomass was estimated by allometric biomass functions for stem with bark, branch, foliage, stump, coarse-roots and fine-roots applied to basic tree dimensions (breast height diameter, 135 total height of tree, number of trees) of SFI stands (Marklund 1988; Pettersson and Ståhl 2006; Repola 2008; Lehtonen et al., 2015b). In order to simulate “steady state” soil carbon stock we estimated long term mean forest biomass, referred to as “steady state forest” below.

We adopted an actual fraction of photosynthetically active absorbed radiation ( $f_{APAR}$ , Fig. A1) as a relative indicator of a site’s capacity to produce biomass (minimum = 0, maximum = 1). The  $f_{APAR}$  was calculated based on basic tree measurements as in Härkönen et al. (2010) and for the main tree species (pine, spruce, deciduous) it was well correlated with the stand basal area (Appendix A). The steady state forest  $f_{APAR}$  values were assumed to be in a range between the median and the maximum fraction of the actual state forest  $f_{APAR}$  for a given species, latitudinal degree, and site productivity class (Appendix A). 145

~~We modelled the steady state biomass by applying the fitted exponential functions between the measured forest biomass components (stem, branch, foliage, stump, coarse-roots, fine-roots) “actual state” and the actual fraction of absorbed radiation ( $f_{APAR}$ ) (Appendix B) to the “steady state” forest  $f_{APAR70}$ . The  $f_{APAR70}$  We selected steady state  $f_{APAR}$  as the 70th percentile ( $f_{APAR70}$ ) out of a range from the 50th to 95th, because the modelled soil carbon distributions with a litter input from the  $f_{APAR70}$  biomass best agreed with the measured soil carbon distributions (Fig. S2). The  $f_{APAR70}$  was the estimated 70th percentile of the actual fraction of absorbed radiation specific for a given species, latitudinal degree, and site productivity class, (Fig. B1). We selected the 70th percentile out of a range from the 50th to 95th, because the modelled soil carbon distributions with a litter input from the  $f_{APAR70}$  biomass best agreed with the measured soil carbon distributions (Fig. S2). The ground-~~

We modelled the steady state biomass by applying the fitted exponential functions between the actual state forest biomass components (stem, branch, foliage, stump, coarse-roots, fine-roots, estimated by tree stand measurements and the allometric biomass functions) and the actual fraction of absorbed radiation ( $f_{APAR}$ ) (Appendix B) to the estimated  $f_{APAR70}$  of the steady state forest. The understory vegetation of the steady state forest was estimated by applying our ground vegetation models (Appendix C) to the modelled steady state forest characteristics, and plot specific environmental conditions.

In order to derive the litter inputs, annual turnover rate (TR, the fraction of living biomass that is shed onto the ground per year, unitless) of biomass components were applied to the modelled 165

biomass components of the steady state forest. The needle litter TR was a linear function of latitude for pine and spruce and a constant for deciduous species (Ågren et al., 2007). The TR of branches and roots were from Mukkonen and Lehtonen (2004), Lehtonen et al. (2004) and the TR of stump and stem were from Viro (1955), Mälkönen (1974, 1977) as cited in Liski et al. (2006). For tree fine roots we assumed there was a difference between tree species and between southern and northern Sweden. For pine, spruce, and birch the fine roots TR were 0.811, 0.868, and 1.0 respectively as reported by Mädi (2001) and Kurz et al. (1996), and cited in Liski et al. (2006). Kleja et al. (2008) and Leppälampi-Kujansuu et al. (2014) reported different fine root TR for Southern (1 and 0.83) and Northern Finland (0.5). We interpolated TR according to the mean annual temperature gradient between TR of fine roots in the South and the North. The fine roots TR of 0.811, 0.868, and 1.0 in the warmest southernmost soil plots were thus reduced down to 0.5 in the coldest northernmost soil plots. The understory TR were applied as in Lehtonen et al. (manuscript).

The major part of the litter input originated from the tree stand biomass components which were modeled by the non-linear functions with  $R^2$  values close to 0.9 (Fig. B1, Tables A1 and B1). The linear understory vegetation models had low  $R^2$  values (Table C1). However, when the understory models (Appendix C) were applied only to plots close to steady state forest, as in our application, the  $R^2$  values of predicted and observed understory components were larger (Fig. S9). In comparison to major understory litterfall originating from reasonably well predicted dwarf-shrubs and mosses (Fig. S9 and S10), the influence of poorer understory models (for herbs, grass, and lichens) was small on predictions of the understory litter and marginal on predictions of the total forest litterfall (Fig. S10). The main improvement on the accuracy of total litter input was achieved by avoiding the confounding effect of actual forest state by modelling the biomass/litterfall estimates representing the mean long-term conditions (defined by estimated steady state  $f_{APAR70}$ ) for small regions (defined by degree of latitude and productivity class for dominant species, Fig. A1). Thus the estimates accurately reflected the long-term spatial variability in dominant species, nutrient status and climate (Fig. S11) and lacked higher spatial and temporal precision; as attempts for high precision of the estimates applied for the period of the last few thousands of years would be uncertain due to high variation of factors affecting plot history.

### 2.1.2 Correlation analysis

Overall our data consists of 3230 soil samples and their carbon stocks linked to soil physicochemical variables, stand and ground vegetation biomass and litterfall components, and nearest weather station environmental variables. We performed the Spearman's rank correlation analysis between the total soil carbon stock and the other soil variables, site, climate and vegetation characteristics. As expected the total soil carbon stock most strongly correlated with the measured variables used for its calculation e.g. bulk density, depth of humus and mineral soil, carbon content, and stoniness. These

variables were excluded from further regression tree analysis which aimed to group data according to the processes of soil carbon stock development.

### 2.1.3 Regression trees

In order to organize SOC data into groups according to the physicochemical soil variables and to better understand the nature of measured data, we generated regression trees of SOC stocks by using recursive partitioning (RPART) (Therneau and Atkinson 1997). RPART is based on developing decision rules for predicting and cross validation of continuous output of soil carbon stocks (regression tree). The classification tree was built by finding a single variable which best splits the data into two groups. Each sub-group was recursively separated until no improvement could be made to the soil carbon stock estimated by using the split based regression model. The complex resultant regression tree model was cross validated for a nested set of sub trees by computing the estimate of soil carbon stock to trim back the full tree.

When building the regression tree models we excluded variables such as bulk density, carbon contents of soil layers, soil depth, and stoniness, since these measured variables were used for determining the total soil carbon stock. The selected variables for the RPART data mining were based on the correlations analysis (see 2.1.2.), the processes of soil organic matter formation (e.g. Husson et al., 2013) and decomposition, and represented the soil categorical variables (sorting of parent material, soil texture, long-term soil moisture and humus form), soil physicochemical variables (sand, clay, and silt content, long-term soil moisture, highly bound water, C/N ratio, pH, CEC of organic, B, BC, and C horizons), climatic variables (annual mean air temperature, annual precipitation sum), and stand and site characteristics (tree species coverage of pine, spruce and deciduous, total foliar litter input, productivity class and N deposition). Alternatively we also ran regression and classification analysis by excluding all measured soil variables because soil variables are often unavailable for landscape level modelling.

The regression tree model separated the measured total SOC stocks ( $\text{tC ha}^{-1}$ ) into 10 groups. The cation exchange capacity of the BC horizon ( $\text{CEC, mmol}_c \text{ kg}^{-1}$ ) divided all the samples into 2/3 of lower SOC stock groups (means between 65 and 130  $\text{tC ha}^{-1}$ ) and 1/3 of larger groups (means between 86 and 269  $\text{tC ha}^{-1}$ ) (Fig. 2a). The group of the smallest SOC stock consisted of 959 samples compared to 8 samples of the group with the largest SOC stocks.

We acknowledge that this is a small distinct group based only on 8 observation. However, we did not have any reasons to exclude these datapoints as outliers. Two-thirds of ~~the samples with~~ smaller SOC stocks were subdivided by CEC and the type sorting of soil parent material (sorted or unsorted). One-third of ~~the samples with~~ larger SOC stocks was subdivided by the C/N ratio, CEC, N deposition among others. Roughly generalized, groups from left to right or from 1 to 10 formed a gradient in levels of SOC stock, moisture, nutrient status, and production (Fig. 2, Table S1).



The alternative regression tree model was built with variables other than soil properties. The regression tree with the annual mean air temperature, the annual precipitation sum and the percentage of pine trees in the stand, and the nitrogen deposition separated measured SOC stocks ( $\text{tC ha}^{-1}$ ) into five groups (Fig. S3). Colder groups with smaller SOC stocks (means 67 and 85) also had less  
240 litter input (below  $3 \text{ tC ha}^{-1}$ ) and low productivity class (height of trees at 100 years of age, H100 < 20 m) (Table S2). The productivity class (H100, m) in our manuscript refers to a site index which can be converted to site productivity. Soil site index is based on dominant height at a certain age (100 years) and is determined according to a dominant height curve (Swedish Statistical Yearbook of Forestry 2014). Nitrogen deposition only slightly impacted the higher productivity class of soils  
245 and litter input (Table S2).

## 2.2 Soil carbon stock modelling

The Q model (Rolff and Ågren, 1999) is a continuous mechanistic litter decomposition model describing change of soil organic matter over time. The decomposition rate for the branch, stem, needle, fine root, and woody litter fractions is controlled by the temperature, litter quality, microbial growth  
250 and litter invasion rate. The model has been calibrated for seven climatic regions of Sweden in order to account for Swedish temperature and precipitation gradients (Ortiz et al., 2011) (Table 3). The Q model was applied in several studies of SOC stock and change estimation in Sweden (e.g. Stendahl et al., 2010; Ortiz et al., 2013; Ågren et al., 2007). The Q model was run for seven Swedish climatic regions (Ortiz et al., 2011). The mean regional parameterization from the calibration of the ~~2012~~  
255 2011 Q model was used for the plot simulations. Thus, the simulations in each region represent variations in climate and litter input and not parameter variations. The steady state soil carbon stocks are estimated in the model using the equation for steady state soil carbon stock which is derived from the decomposition functions with constant amounts and quality of litter input.

The Yasso07 model (Tuomi et al., 2009; 2011) is ~~an advanced forest soil carbon model~~one of  
260 the most widely applied SOC models. The model was calibrated based on almost 10 000 measurements of litter decomposition from Europe, North and South America (Table 3). The required annual inputs of litterfall, its size and chemical composition, temperature and precipitation determine the decomposition and sequestration rates of soil organic matter. Yasso07 estimates SOC stock to a depth of 1 m (organic and mineral layers), change of SOC stock, and heterotrophic soil respiration.  
265 ~~The Yasso07 model, which is used for soil carbon Kyoto protocol reporting by several European countries, i.e. Austria, Finland, Norway, and Switzerland, is one of the most widely applied SOC model.~~ Species specific chemical composition of different litter compartments of Yasso07 were used according to Liski et al. (2009). The initial soil organic matter of Yasso07 was zero. The simulated soil carbon stock corresponding to a steady-state between the litter input and decomposition was  
270 achieved by a Yasso07 spin-up run of 10 000 years. Yasso07 runs used litter inputs of the steady state forest biomasses (see 2.1.1-) and climate variables (annual air temperature, monthly tempera-



ture amplitude, and annual precipitation). The global parameter values of decomposition rates, flow rates, and other dependencies of Yasso07 soil carbon model were adopted from Tuomi et al. (2011) and the estimates of Yasso07 SOC stocks were used in comparison with measurements and other models. We did not use the SOC stocks simulated with the more recent Yasso07 parameters based on the litter decomposition data from the Nordic countries (Rantakari et al., 2012), because the SOC stocks simulated with the global parameter values produced better fit with SFSI measurements.

The CENTURY mathematical model originally developed for grassland systems (Parton et al., 1987; 1992) has been since modified for various ecosystems including boreal forests (Nalder and Wein 2006). The CENTURY is also one of the most widely applied models ~~and it is used for soil carbon reporting to UNFCCC by Canada, Japan, and USA~~. The soil organic matter in the model consists of active, slow, and passive pools which have different TR (Table 3). The decomposition rates are modified by temperature and moisture, and in addition the decomposition rates of the slow and passive pools rely on lignin to N and C to N ratios, while the active pool decomposition rate relies on soil texture. The model simulates soil organic matter to a depth of 20 cm. The model simulates plant production and pools of living biomass, while TR for biomass pools determine the litterfall inputs to soil. To compare the performance of the soil sub-model with other soil carbon dynamics models, Q and Yasso07, we only used the CENTURY soil sub-model. We used the same litterfall inputs as used by the Q and Yasso07 simulations, which were estimated by our litterfall modelling (see 2.1.1). ~~The nitrogen dynamics in our CENTURY model application were held constant. N dynamics in CENTURY sub-model included tuning site specific parameters of topsoil mineral N relative to N deposition (Throop et al. 2004) and reduction of C/N ratio of the litterfall up to 15% for most productive sites (Merilä et al. 2014). We also accounted for site specific soil drainage by varying its parameter between 1 and 0.6 relative to long-term soil water content ranging between 10 and 50% (Raich et al. 2000).~~ The CENTURY SOC stocks simulation were run with steady state forest litter inputs, site specific C/N ratios of litterfall, site specific soil parameters (specific bulk density, sand, silt, and clay content, mineral N in topsoil, and drainage) and climate variables (monthly air temperature, and monthly precipitation). In order to account for the deep soil carbon (Jobbágy and Jackson 2000), we scaled CENTURY estimates representing the topsoil horizon by adding 40% of estimated site specific SOC stock. The simulated steady state SOC stocks were estimated by a spin-up run of 5 000 years. The number of years to reach steady state (equilibrium between the litter input and decomposition) was sought empirically on 100 random sites, and differs from Yasso07 ~~because running CENTURY was computationally more demanding and Q models.~~

### 3 Results

The distributions of Yasso07, Q, and CENTURY model estimates of total SOC stocks ( $\text{tC ha}^{-1}$ ) were in agreement for 2/3 of the measured data with lower SOC stock (Fig. 3, distributions of groups 1, 2, and 4). The remaining 1/3 of data was underestimated by models. This 1/3 of data was separated into 7 physicochemical soil groups (means of groups in range from 104 to exceptionally large  $269 \text{ tC ha}^{-1}$ , see Fig. 3, distributions of groups 3, and 5-10). The linear regression of mean levels of all 10 physicochemical soil groups (weighted by the number of samples in each group) between the modelled and measured SOC stocks showed smaller underestimation of Yasso07 compared to the CENTURY CENTURY compared to Yasso07 and Q models (Fig. 4). The weighted root mean square error (RMSE) was  $31.6-27.5$  ( $\text{tC ha}^{-1}$ ) for Yasso07 and  $41.7$  CENTURY and  $31.6$  and  $38.8$  for CENTURY Yasso07 and Q respectively. The proportion of explained variance was larger for Q ( $r^2 = 0.58$ ) than for Yasso07 and CENTURY ( $r^2 = 0.42$  and  $0.390,32$ ) (Fig. 4). The deviation of the distributions of CENTURY SOC stocks, simulated using soil bulk density, sand, silt, and clay content, were similar as for lower than those of Yasso07 and Q estimates for 10 physicochemical soil groups (Fig. 3). Accounting for site specific soil texture (clay, silt, and sand content) and structure (bulk density) by CENTURY model improved SOC stock estimates for fertile sites with high clay content, but not for sites with high N deposition. Varying CENTURY parameters of site specific topsoil mineral Nitrogen and C/N ratio of the litterfall showed that this impact on SOC stocks estimates was small in comparison to sensitivity of SOC stock estimates to litterfall (Fig. S12). The application of site specific drainage on our mostly well drained soils showed minor impact on estimated CENTURY SOC stocks.

As expected, the models clearly showed less variation than the measurements. The shift of the mean values from the center of distribution, the width of confidence intervals of means, and the width of the tails of distributions were clearly larger for the measurements than for the modelled estimates (Fig. 3). The modelled distributions agreed for the poor-medium fertility soils with low and medium measured SOC stocks, low and medium cation-exchange capacity (CEC), unsorted parent material, low temperatures and low production (groups 1, 2, and 4) (Fig. 2, Table S1, Fig. 3). Disagreement between modelled and measured SOC stock distributions were formed on fertile soils with sorted parent material (groups 3 and 5), soils with higher water content (groups 3, 5, and 10), where nitrogen deposition was large (groups 7 and 8), and where cation-exchange capacity (CEC) was median or large (Fig. 2, Fig. 3). The largest deviation between the measured and modelled distributions was found for the relatively small physicochemical groups of soils (3%) typical for highly bound water and peat humus types (groups 8 and 10) (Fig. 2, Fig. 3). The distributions of measured total SOC stocks ( $\text{tC ha}^{-1}$ ) generally increased for the groups with higher nutrient status (Fig. 3, Fig. S4). The distributions of SOC stocks in mineral soil were larger than those in humus horizon, and distributions of mineral SOC stocks increased with fertility slightly more than distributions of SOC stocks in humus horizon (Fig. S4).

After excluding all the soil physicochemical characteristics from the recursive partitioning, the  
345 SOC stock distributions of 5 groups regression tree model (Fig. S3, Table S2) were in agreement  
between the measurements and model estimates for 3 groups (77% of samples) and deviated for 2  
groups (23%) (Fig. S5).

~~The models underestimated distributions on sites with high (>10) nitrogen deposition (21% of  
samples) and on sites with warm and dry climate (2% of samples) (Fig. S5). The~~ The modelled SOC  
350 stock distributions agreed with measurements for all models on sites with cold annual temperatures  
< 3 °C in northern sites (low-C.cold.pine, low-C.cold.other) (Fig. S5). ~~However, and~~ for warmer  
conditions in middle Sweden on sites with low nitrogen deposition ~~SOC stock distributions only  
Yasso07 predictions agreed with the measurements but were underestimated for CENTURY and Q  
estimates and median SOC stocks (Fig. S5). However, the models underestimated SOC stocks on~~  
355 sites with high (> 10 kgN ha<sup>-1</sup> y<sup>-1</sup>) N deposition (21% of samples) and on sites with warm and dry  
climate (2% of samples) (Fig. S5).

The variation of density functions of modeled SOC stocks for 10 physicochemical groups (Fig. 3)  
was similar to the variation of the total annual plant litter input (tC ha<sup>-1</sup>) (Fig. S6) indicating  
that litterfall was the main driver of SOC accumulation in the models. The mean levels of an-  
360 nual plant litter input and mean SOC stocks for 10 ~~groups were strongly correlated (the proportion  
of explained variance of weighted linear regressions ranged between 0.85~~ soil groups were more  
strongly correlated for Yasso07 and Q models (with  $r^2$  values 0.86 and 0.96 ~~for the CENTURY and  
Q models). None of, respectively) than for CENTURY ( $r^2 = 0.52$ ). Although, models performed  
reasonably well for the largest soil groups of nutrient and production levels (Fig. 3 and Fig. 4), none  
365 of the models was able to explain the spatial variations for any of the physicochemical groups well  
predict variation of individual samples (Fig. S7). Model estimates were correlated better The model  
estimates were well correlated between Yasso07 and CENTURY with an  $r^2$  range ranging from 45  
to 66%, ~~whereas  $r^2$  values with Q estimates 73% for individual samples of 10 soil groups, whereas  
the correlations of estimates between Q and the other two models ranged from 12 to 36% were lower~~  
370 (Fig. S8).~~

## 4 Discussion

### 4.1 SOC stock distributions linked to mechanisms of SOM stabilization

It has been suggested that process based soil carbon models with the current formulation lacking  
major soil environmental and biological controls of decomposition would fail for conditions where  
375 these controls predominate (Schmidt et al., 2011; Averill et al., 2014). Although, the effect of the  
soil properties on SOC stocks e.g. soil nutrient status in the widely used models such as Yasso07,  
Q, and CENTURY have not previously been quantitatively evaluated. We found that in comparison  
with Swedish forest soil inventory (~~SFSI~~) data, the models based on the amount and quality of

inherent structural properties of plant litter (Q, Yasso07, and CENTURY) produced accurate SOC  
380 stock estimates for 2/3 of northern boreal forest soils in Sweden. Two-thirds of the distributions  
of SOC stocks measurements of SFSI agreed with distributions of SOC stock estimates of the Q,  
Yasso07, and CENTURY soil carbon models (Fig. 3, distributions of groups 1, 2, and 4). However,  
the SOC stocks underestimation by these models for one third of the data (Fig. 3, distributions of  
385 groups 3, and 5-10) indicated that some drivers other than molecular structure, especially site nutrient  
status, play an important role in higher SOC stocks sequestration.

Some level of deviation from measurements and poorly explained spatial variation (Fig. S7) was  
expected from the uncertainties of the SOC measurements, annual plant litter inputs and climate  
variability for the model SOC stock change estimates (Ortiz et al., 2013; Lehtonen et al., 2015a).  
For the long-term SOC stock development the model uncertainties are less known than for the short-  
390 term litter decomposition. Previously reported fine scale comparison also showed poor agreement  
between Earth system models and the Northern Circumpolar Soil Carbon Database (Todd-Brown  
et al., 2013), although drivers of the deviation still remained open. Our results showed that if mod-  
els strongly depend on the litter inputs (Fig. S6) then the spatial differences between measured and  
modeled SOC stock distributions could be linked to sites with rich nutrient status through cation  
395 exchange capacity, C/N ratio, N deposition, drainage (sorting of parent material) among other fac-  
tors (Fig. 2 and 3). Additionally, when the soil properties were excluded from the regression, the  
estimates of SOC stocks also deviated for the fertile groups (Fig. S5). However, the rich nutrient  
status for these groups was linked to differences in species composition, N deposition, and climate  
(temperature, precipitation) instead of soil properties (Fig. S3).

400 Larger net soil carbon accumulation in nutrient rich sites could be attributed to the relative dif-  
ferences in litterfall components (relatively more leaves and branches with higher N content than  
fine roots) ~~and to the reduced microbial demand for N from fine roots and SOM~~ (, and to higher N  
availability and carbon use efficiency of decomposers, reduction of respiration per unit of C uptake  
(Ågren et al., 2001, Manzoni et al., 2012, Fernández-Martínez et al., 2014). Largest deviation be-  
405 tween measured and modeled data in our study was found for fertile presumably N rich and fresh  
to fresh-moist sites. The soils with large N deposition were also highly productive and showed high  
to exceptionally high SOC stocks (Fig. 2, Fig. 3, soil groups 7 and 8). This was in agreement with  
fertilization and modelling study of Franklin et al. (2003) showing an increase in soil C accumulation  
with N addition. Our forest biomass and litterfall estimates were based on forest inventory and mod-  
410 eling, but the site nutrient status and N deposition was only partially reflected in the amount of  
biomass/litterfall (Fig. S11) and its quality. The quality was only reflected through the biochemi-  
cal differences between species and plant litter components. The relative differences between the  
biomass/litterfall components or between C/N ratios of litterfall in relation to site fertility are not  
accounted by the current biomass models, but soil fertility could be considered in an attempt of SOC  
415 stock modelling (included in CENTURY but missing in Yasso07 and Q models). For example the

proportion of acid -, water -, and ethanol-soluble and non-soluble litter inputs for Yasso07 could be re-evaluated by allowing it to vary depending on site fertility, in addition to currently used variation specific for species and the litter components. Although CENTURY SOC stocks were sensitive to the amount of clay, the variation of topsoil mineral N and C/N ratio of litterfall did not improved SOC stock predictions for sites with high N deposition (Fig. 3 and Table S1).

420

The litter decomposition and SOC stabilization rates in Yasso07, Q, and CENTURY based on the litter quality “recalcitrance” originating from the litter bag mass loss measurements have major drawbacks. The mass loss from the litter bags is assumed to be fully mineralized, although the litterbags are subjected to non-negligible leaching (Rantakari et al., 2012; Kammer and Hagedorn, 2011). The SOC stabilization represented in models by the remaining litter mass is thus underestimated due to the fraction of particulate organic matter and dissolved organic carbon that is lost from the litterbags but later immobilized e.g. through organo-mineral stabilization. The use of stable isotopes seems to determine the field carbon mineralization and accumulation rates from the labile (high C quality and N concentration) or recalcitrant (low C quality and N concentration) litter more accurately than litter bags (Kammer and Hagedorn, 2011).

425

430

Higher amount of more recalcitrant fine roots compared to more labile leaves (Xia et al., 2015) heavily increased the soil carbon sequestration in CENTURY model simulations which was in line with McCormack et al. (2015). Though, the contribution of fine roots to SOC stabilization is still not settled due to the significant role of mycorrhizal fungi in SOC accumulation (Averill et al., 2014; Orwin et al., 2011). Xia et al. (2015) claimed that more recalcitrant fine roots contribute to stable SOC more than leaf litter, because fine roots degrade slower. This would be supported by the fact if the precursors of fine roots that are degraded by fungi are more stable than the precursors of leaves degraded by microbes. However, more recalcitrant plant litter has been also suggested to stabilize less SOC stocks (Kammer and Hagedorn, 2011). This is a result of recalcitrant litter satisfying less of the microbial N demands promoting respiration and reducing the long-term production of microbial products, precursors for the organo-mineral stabilization (Cotrufo et al., 2013, Castellano et al., 2015). According to the microbial efficiency-matrix (MEM) stabilization mechanism (Cotrufo et al., 2013) fertile sites with relatively more labile plant litter, but with larger absolute production and larger microbial activity than poor sites, would in long-term stabilize more carbon through organo-mineral stabilization. Our results supported MEM stabilization theory by showing larger carbon stocks in mineral soil than in humus horizon, and by relatively more SOC stocks in mineral soil in fertile groups than in poor conditions (Fig. S4).

440

445

Expanding on the CENTURY model structure, the MySCaN model incorporating the organic nutrient uptake by mycorrhizal fungi estimated positive effect on SOC accumulation, relatively larger in poor than in fertile sites (Orwin et al., 2011). Ignoring Therefore, not accounting for the organic nutrient uptake by mycorrhizal fungi by the Yasso07, Q, and CENTURY models probably led to the underestimation of SOC stocks in medium-highly-productive-soilssites with higher nutrient status.

450

This hypothesis needs to be tested in further studies. We did not have all input data and the source code to include MySCaN into our model intercomparison. The spatial trends of N and P data of litter  
455 in Sweden that would be needed to make such study were not available. However, adjusting biomass turnover rates, used for the litter input estimation, in dependence to site fertility would lead into larger inputs for fertile sites and increased SOC stock accumulation as a result of increasing plant productivity and inputs. It is well established that SOM increases soil fertility by improving the soil water and nutrient holding capacity; recycling of SOM increases CEC, humic substances and nutri-  
460 ent availability for plant resulting in larger biomass/litter production (Zandonadi et al., 2013). As an alternative to adjusting turnover rates with site fertility, we suggest that a feedback link in models between increasing fertility due to SOC stock accumulation (e.g. due to increased CEC relative to humus, increased nitrogen availability), increasing litter inputs, and reduced rates of SOC decomposition per unit of litter input (e.g. through satisfying more microbial N demand with less respiration,  
465 limited oxygen in increased moisture conditions) would also increase SOC stock accumulation.

Increased moisture and more frequent water saturation due to SOC accumulation limits soil oxygen availability and slows rates of microbial decomposition which increases the rate of SOC stabilization. Our results, which were derived from mostly well drained soils, suggest that measured high SOC stocks may be partly caused by reduction of decomposition at increased water content  
470 (Fig. 2). The CENTURY model has an optional function that represents the reduction of decomposition caused by anaerobic conditions. The function becomes active when a controlling parameter, “drain”, is changed, and the value of the parameter has to be arbitrarily determined through parameter fitting against SOC data (e.g. Raich et al., 2000). ~~The function is~~ However, this function was meant for anaerobic conditions in poorly drained soils, ~~and therefore is therefore it was~~ not applicable to ~~(most of )~~ the prevailing conditions of our sites. ~~In addition, tuning a specific parameter to reproduce the SOC data was beyond the scope of this study. Our results, which were derived from mostly well drained soils, suggest that high SOC stocks may be partly caused by reduction of decomposition at increased water content~~ Accounting for drainage only on some sites slightly affected decomposition, when precipitation increased and potential evapotranspiration decreased  
480 in late spring or early autumn. Water availability affecting soil fertility and SOC formation is beside climate also affected by topography (Clarholm et al., 2013) which was not accounted for by CENTURY. Detailed modelling of soil water conditions requires specific functions and many parameters, which are not included in simpler SOC models like Q and Yasso07. However, appropriate modelling of soil water conditions and reduction of decomposition in wet conditions (not necessarily  
485 at saturation) would potentially improve the performance of SOC models in particular for soils with high SOC stocks.

## 4.2 Intercomparison of models

The similarities between the variations of modeled SOC stocks and litterfall inputs for the soil groups with different fertilities (Fig. 3, Fig. S6) could be expected for the Yasso07 and Q models which ignore the soil properties. These models run organic matter decomposition and humus stabilization with litterfall, temperature and/or precipitations input data. Litter quality as input in Yasso07 and Q implicitly includes some information on soil properties, but as we saw litter quality hardly mapped any of soil fertility. ~~Unexpectedly the low~~ Although, the impact of soil properties on the estimates was seen ~~also in the relatively more complex model CENTURY (accounting for the plot specific bulk density, sand, silt, and clay content in addition to litter input, temperature and precipitation data).~~ Contrary to our expectation, the in the more complex CENTURY model still heavily depended model for sites with high clay content, the SOC stock of sites with high N deposition were underestimated. The CENTURY model depended less on the amount of litter input, and its variations of the estimated SOC stocks distributions were ~~similar to~~ less pronounced than those for the Yasso07 and Q models. In testing multiple soil carbon models with same litter inputs Palosuo et al. (2012) observed larger variation in modeled SOC stocks at the early stage of the litter decomposition (10 years) but later on at 100 years the variation decreased. Although the variations of SOC stocks were similar between the models, the estimated CENTURY SOC stocks distributions were ~~slightly~~ lower than the Yasso07 estimates when we did not accounted for deep soil carbon. CENTURY in its original configuration simulated SOC stock up to 20 cm soil depth (Metherell et al., 1993) whereas the Yasso07, Q, and measured SOC stocks data represented up to 100 cm of the soil (Tuomi et al., 2009, Stendahl et al., 2010). In Yasso07 model parameters were calibrated based on soil age chronosequence data of SOC stocks for soil depths up to 30 cm, which was assumed to represent 60% of the total SOC stocks up to 100 cm soil depth (Liski et al., 1998, 2005 as cited by Tuomi et al., 2009). Therefore, ~~if 40-50~~ when 40% of the missing deep carbon (Jobbágy and Jackson 2000) were added on top of the original CENTURY estimates as ~~is done for~~ was done when calibrating Yasso07, the SOC stock levels for CENTURY ~~would be~~ were larger than those for the Yasso07 and Q models.

Although estimated SOC stocks of CENTURY were generally ~~lower~~ larger than those of Yasso07, the correlation between CENTURY and Yasso07 estimates was stronger than for Q model compared to two other models (Fig. S8). The reason was probably similar global parameterizations of Yasso07 and CENTURY whereas Q was specifically parameterized and applied for the regions in Sweden (Ågren and Hyvönen 2003, Ortiz et al., 2013). Furthermore the Q model SOC stock estimates were more sensitive to differences in species coverage e.g. to pine and spruce (Ågren and Hyvönen 2003) and formed two distinct point cloud distributions (one for pine and broadleaves, the other for spruce) when compared with the CENTURY or Yasso07 estimates (Fig. S8). In spite of similarities in Yasso07 and CENTURY SOC stocks estimates, Yasso07 was more sensitive to species coverage through species specific litterfall solubility (Liski et al., 2009) ~~was more sensitive to species coverage~~ than CENTURY which treated conifers in a single group (Metherell et al., 1993). Pine and



other species (spruce) coverage was shown to affect measured low and median SOC stocks of colder  
525 climate if the soil properties were not considered (Fig. S5). Therefore the pattern of increased ac-  
cumulation of SOC stock on sites with larger spruce coverage partially observed in distribution of  
Yass07 estimates, and missing in the CENTURY estimates, could be related to the slightly lower  
solubility/decomposability of spruce compared to pine litterfall. However, the CENTURY model  
SOC stocks were also highly sensitive to accurate estimation of fineroots litterfall (Mc Cormack  
530 et al., 2015) typically increasing with colder climate and increasing the C/N ratio of the organic  
layer (Lehtonen et al., 2015b) which is driven by the dominant tree species (Cools et al., 2014).

Large SOC stocks measurements on sites with high long-term nitrogen deposition over 10  
kgN ha<sup>-1</sup> y<sup>-1</sup> (Fig. 3 and Fig. S4) were underestimated by the Q, Yasso07, and CENTURY models.  
A positive correlation between nitrogen deposition and SOC stocks measurements in Sweden had  
535 been previously reported by Olsson et al. (2009), and the modelling study by Svensson et al. (2008)  
indicated that Swedish soil carbon was decreasing in the North and increasing in the South mainly as  
a result of different nitrogen inputs. The Q and Yasso07 models do not have nitrogen processes. As  
for CENTURY, it is reported that large N input could enhance plant productivity and then increase  
SOC (Raich et al., 2000). The purpose of the study was to evaluate the performance of soil carbon  
540 models against the same SOC data using the same litter input, and therefore only the soil carbon  
submodel was used and the feedback of nitrogen input to plant productivity was ~~not primarily~~  
included in this study -indirectly, through estimated steady state litter input based on site productivity  
class which strongly correlated with N deposition (Fig. A1 and S11). In spite of slight increase of  
SOC stock estimates when CENTURY accounted for the site specific topsoil mineral N, C/N ratio  
545 of litterfall, in sites with large N deposition CENTURY still underestimated. However, as in the  
case of drainage discussed above, the ~~original~~-CENTURY incorporates more detailed processes than  
the relatively simpler soil carbon models, Q and Yasso07, do, and hence the ~~original~~-CENTURY  
could potentially reproduce a wider range of SOC stocks if it was parameterized in detail with more  
detailed data.

## 550 5 Conclusions

~~The~~ In this study we presented the reasons to re-evaluate the connection between the soil nutrient  
status and performance of widely applied soil carbon models (Yasso07, Q, and CENTURY).  
As previously described in detail, our simulation was based on the widely used process based  
SOC models, accurate driving data including litter inputs, and massive SOC data points (Swedish  
555 inventory data, N=3230). The models differed in the main controls and functions and their  
performance was expected to depend on model complexity (CENTURY outperforming Q and  
Yasso07). The intercomparison of SOC stocks between Yasso07, Q, and CENTURY models and  
Swedish soil carbon inventory data revealed that these process based mathematical models de-

veloped for predicting short-term SOC stock changes ~~such as Yasso07, Q, or CENTURY can all~~  
560 in their current state ~~can~~ predict accurate long-term SOC stocks for most soils. ~~However, for the~~  
~~The estimates of CENTURY fitted generally better to measurements than those of Yasso07 and Q~~  
~~model. However, Yasso07 model which requires fewer parameters and less input data showed similar~~  
~~performance than CENTURY, except for sites with high clay content. The models with their current~~  
565 ~~underestimated for conditions where the high nutrient status predominate, in our application for~~  
~~medium-highly fertile soils the accumulation of stable SOC by models based on extrapolation of~~  
~~initial plant litter decomposition into the long term leads to underestimation. Therefore productive~~  
~~sites of Southern Sweden.~~

Through the intercomparison of three different widely-used SOC models with massive data  
570 points, we identified that re-evaluating of the impact of nutrient status would improve the model  
development towards their accuracy. Particularly, the relationship between the soil nutrient status  
and the mechanism of soil organo-mineral carbon stabilization needs to be ~~evaluated~~re-evaluated,  
because larger SOC stocks were found in the mineral than in the humus soil horizon. We suggest  
evaluating enhanced microbial transformation of soil organic matter and the mycorrhizal organic  
575 nutrient uptake ~~and in relation to~~ larger plant biomass/litter production in nutrient rich sites resulting  
to higher SOC stock accumulation ~~. For in deeper soil layers. In addition for~~ the organo-mineral car-  
bon stabilization, we also suggest further model development accounting for the soil nutrient status  
through evaluating the effect of topography on sorting of the parent material, and its silt and clay  
complexes. ~~If modelscan be further developed to-~~

580 Our study is very useful for developing accurate soil carbon and Earth system models.  
Furthermore, developing accurate models that would account for the ~~processes that affect the soil~~  
nutrient status as one of the key controls affecting the soil organic matter production and ~~stabilization~~  
~~than the soil carbon stock estimates, needed when GHG inventories are used to estimate emissions~~  
~~and sinks due to land-use change, and soil carbon stock management would be improved.-~~

585 ~~The estimates of Yasso07 fitted generally better to measurements than those of CENTURY~~  
~~making the use of the Yasso07 model which requires fewer parameters and less input data more~~  
~~preferable over CENTURY. If CENTURY estimates would be scaled from 20 cm up to 1m the~~  
~~underestimation with data would improve, although the deviation in fertile soils would be similar.~~  
~~Furthermore when running soil carbon models such as those which obtain litter inputs based on~~  
590 ~~current stand measurements, when past forest stand dynamics are unknown, we suggest using litter~~  
~~inputs from the steady state forest estimated as 70th percentile of the maximum current state forest~~  
~~biomass for a given species, latitude and productivity class. As models heavily depend on the~~  
~~litter input and its quality, a more accurate litter input would also improve the soil organic carbon~~  
~~stock estimates~~SOC stabilization improves estimation of feedback of global warming on SOC stock

595 [temperature sensitivity and soil CO<sub>2</sub> efflux, national reporting of soil carbon stock changes for UNFCCC, and implications of decisions mitigating the climate change effects on soil carbon stocks.](#)

### Appendix A: Models of fraction of absorbed radiation for actual and steady state forest

The fraction of photosynthetically active absorbed radiation ( $f_{APAR}$ ) for actual state forest was calculated based on basic tree measurements of Swedish forest inventory data as in Härkönen et al. (2010). For the main tree species  $f_{APAR}$  was also well correlated with the stand basal area (600  $r^2$  was 0.85, 0.86, and 0.88 for pine, spruce, and deciduous stands respectively, coefficients of regressions in Table A1). The actual state forest  $f_{APAR}$  varied between 0 and maximum close to 1 (Fig. A1).

The steady state forest  $f_{APAR}$  values were assumed to be in range between the median and the 605 maximum fraction of actual state forest  $f_{APAR}$  for given species, latitudinal degree, and site productivity class (indicated by the height of largest tree at 100 years of stands age). The steady state forest  $f_{APAR}$  values were set to 70th percentile of maximum  $f_{APAR}$  ( $f_{APAR70}$ ) for given species, latitudinal degree, and site productivity class. We selected 70th percentile out of range from 50th to 95th, because the modelled soil carbon distributions with the litter input from biomass of  $f_{APAR70}$  610 best agreed with measured soil carbon distributions (Fig. S2). The  $f_{APAR70}$  values specific for pine, spruce, and deciduous stands were first modelled by regression models with latitude ( $f_{APAR70LAT}$ ) (Table A2) and then reduced by the difference between the modelled  $f_{APAR70}$  by regression models with productivity class (H100) ( $f_{APAR70H100}$ ) (Table A1) and maximum  $f_{APAR70H100}$  ( $f_{APAR70} = f_{APAR70LAT} + f_{APAR70H100} - \text{maximum } f_{APAR70H100}$ ). The  $f_{APAR70}$  values equaled the 615  $f_{APAR70LAT}$  values only for the maximum productivity class, otherwise it was reduced.

### Appendix B: Models of forest dry weight biomass ( $\text{kg ha}^{-1}$ ) with $f_{APAR}$ .

We fitted species specific exponential regression models between the biomass components (stem, branch, foliage, stump, coarse-roots, fine-roots) of actual state forest and the actual fraction of absorbed radiation ( $f_{APAR}$ ) (statistics of the regression models in Table B1). The biomass components 620 derived with allometric models (measured) and those derived with  $f_{APAR}$  models (modeled) showed strong correlations (Fig. B1). In order to model the longterm mean forest biomass “steady state forest biomass” we applied the  $f_{APAR}$  biomass models to the modeled  $f_{APAR70}$  values.

### Appendix C: Models of understory vegetation.

We used Swedish forest inventory –ground vegetation coverage (%) data visually monitored between 1993 and 2002 on 2440 plots around Sweden with altogether 4472 observations separately 625 for species of –forest floor vegetation /or their classes (Table S3). –In order to derive the ground

vegetation biomass and to apply the coverage/biomass conversion functions (~~Aleksi Lehtonen, unpublished results~~ [Lehtonen et al., manuscript](#)), we grouped the species coverage observations into five functional types (dwarf-shrubs, herbs, grasses, moss, and lichen) (Table S3). The applied coverage/biomass conversion functions estimated separately the above- and below-ground biomass components for dwarf-shrubs, herbs, and grasses, and total biomass for moss, and lichen.

Except the understory coverage, the forest inventory data also contained basic tree dimensions (diameter and height of trees) and stand variables (species dominance, age, basal area, site productivity class indicated by the height of largest trees at 100 years of stands age), and also we linked the plots by their closest proximity to ~~Swedish Meteorological and Hydrological Institute (SMHI)~~ [SMHI](#) weather stations with weather data (air temperature, precipitation) and location attributes of the weather stations (latitude, longitude, altitude).

We built linear ~~ground-vegetation models for~~ [dry weight biomass of understory vegetation](#) ( $\text{kg ha}^{-1}$ ) ~~models~~ in a two level selection of the predictors from stand, weather and location variables. First, we selected the predictors into linear models by using R package “Mass” and its stepwise model selection by exact AIC (Venables and Ripley, 2002). Second, we refined the model by using “relaimpo” R package estimating usefulness (Grömping, 2006), or relative importance for each of the predictors in the model, and by selecting only predictors with relative importance  $\geq 0.1$ . The general form of the models was:

$$y_i = a + b_1x_1 + \dots + b_nx_n + \varepsilon, \quad (\text{C1})$$

Where  $y_i$  is the understory dry weight biomass ( $\text{kg ha}^{-1}$ ),  $x_1 \dots x_n$  are the predictors,  $a, b_1 \dots b_n$  are parameters of the  $i^{\text{th}}$  understory functional type (Table C1), and  $\varepsilon$  is the residual error. [Statistics of the models are shown in Table C1.](#) Scatter plots between the measured coverage derived biomass and modelled dry weight biomass ( $\text{kg ha}^{-1}$ ) of the functional types of ground vegetation [for the forests in their actual state close to the estimated steady state](#) are shown on Fig. S9. ~~Statistics of the models are shown in Table C1.~~

### Code and data availability

The source codes of the Yasso07, Q and CENTURY models used in this paper are available through the supplementary material. Data used in this study can be available directly by contacting the authors.

*Acknowledgements.* This work was part of the ~~project~~ [Metla project 7509](#) ‘Improving soil carbon estimation of GHG inventory’ funded by the Finnish Ministry of the Environment and the Ministry of Agriculture and Forestry, [and Academy of Finland mobility projects 276300 and 276602.](#) [We thank the Referees for their valuable comments improving the manuscript.](#)

## 660 References

- Adair, E. C., Parton, W. J., Del Grosso, S. J., Silver, W. L., Harmon, M. E., Hall, S. A., Burke, I. C. and Hart, S. C.: Simple three-pool model accurately describes patterns of long-term litter decomposition in diverse climates, *Global Change Biol.*, 14, 2636-2660, 2008.
- 665 [Ågren, G. I., Bosatta, E. and Magill, A. H.: Combining theory and experiment to understand effects of inorganic nitrogen on litter decomposition, \*Oecologia\*, 128, 94-98, 2001.](#)
- Ågren, G. I. and Hyvönen, R.: Changes in carbon stores in Swedish forest soils due to increased biomass harvest and increased temperatures analysed with a semi-empirical model, *For. Ecol. Manage.*, 174, 25-37, 2003.
- Ågren, G., Hyvönen, R. and Nilsson, T.: Are Swedish forest soils sinks or sources for CO<sub>2</sub>—model analyses based on forest inventory data, *Biogeochemistry*, 82, 217-227, 2007.
- 670 Amundson, R.: The carbon budget in soils, *Annu. Rev. Earth Planet. Sci.*, 29, 535-562, 2001.
- Averill, C., Turner, B. L. and Finzi, A. C.: Mycorrhiza-mediated competition between plants and decomposers drives soil carbon storage, *Nature*, 505, 543-545, 2014.
- Berthrong, S. T., Jobbágy, E. G. and Jackson, R. B.: A global meta-analysis of soil exchangeable cations, pH, carbon, and nitrogen with afforestation, *Ecol. Appl.*, 19, 2228-2241, 2009.
- 675 Boden, T. A., Marland, G. and Andres, R. J.: Global, regional, and national fossil-fuel CO<sub>2</sub> emissions, Carbon Dioxide Information Analysis Center, Oak Ridge National Laboratory, US Department of Energy, Oak Ridge, Tenn., USA, 2010. doi 10.3334/CDIAC/00001\_V2010
- Castellano, M. J., Mueller, K. E., Oik, D. C., Sawyer, J. E. and Six, J.: Integrating Plant Litter Quality, Soil Organic Matter Stabilization and the Carbon Saturation Concept, *Global Change Biol.*, 2015.
- 680 [Clarholm, M. and Skjellberg, U.: Translocation of metals by trees and fungi regulates pH, soil organic matter turnover and nitrogen availability in acidic forest soils, \*Soil Biol. Biochem.\*, 63, 142-153, 2013.](#)
- Clemente, J. S., Simpson, A. J. and Simpson, M. J.: Association of specific organic matter compounds in size fractions of soils under different environmental controls, *Org. Geochem.*, 42, 1169-1180, 2011.
- Cools, N., Vesterdal, L., De Vos, B., Vanguelova, E. and Hansen, K.: Tree species is the major factor explaining
- 685 C: N ratios in European forest soils, *For. Ecol. Manage.*, 311, 3-16, 2014.
- Cotrufo, M. F., Wallenstein, M. D., Boot, C. M., Deneff, K. and Paul, E.: The Microbial Efficiency-Matrix Stabilization (MEMS) framework integrates plant litter decomposition with soil organic matter stabilization: do labile plant inputs form stable soil organic matter?, *Global Change Biol.*, 19, 988-995, 2013.
- Deluca, T. H. and Boisvenue, C.: Boreal forest soil carbon: distribution, function and modelling, *Forestry*, 85,
- 690 161-184, 2012.
- Dungait, J. A. J., Hopkins, D. W., Gregory, A. S. and Whitmore, A. P.: Soil organic matter turnover is governed by accessibility not recalcitrance, *Global Change Biol.*, 18, 1781-1796, 2012.
- Falloon, P., Jones, C. D., Ades, M. and Paul, K.: Direct soil moisture controls of future global soil carbon changes: An important source of uncertainty, *Global Biogeochem. Cycles*, 25, - GB3010, 2011.
- 695 Fan, Z., Neff, J. C., Harden, J. W. and Wickland, K. P.: Boreal soil carbon dynamics under a changing climate: A model inversion approach, *Journal of Geophysical Research: Biogeosciences*, 113, - G04016, 2008.
- Fernández-Martínez, M., Vicca, S., Janssens, I. A., Sardans, J., Luysaert, S., Campioli, M., Chapin III, F. S., Ciais, P., Malhi, Y., Obersteiner, M., Papale, D., Piao, S. L., Reichstein, M., Roda, F. and Penuelas, J.:

- Nutrient availability as the key regulator of global forest carbon balance, *Nature Clim. Change*, 4, 471-476, 2014.
- 700 [Franklin, O., Högberg, P., Ekblad, A. and Ågren, G. I.: Pine forest floor carbon accumulation in response to N and PK additions: bomb 14C modelling and respiration studies, \*Ecosystems\*, 6, 644-658, 2003.](#)
- Grömping, U.: Relative importance for linear regression in R: the package relaimpo, *Journal of statistical software*, 17, 1-27, 2006.
- 705 Härkönen, S., Pulkkinen, M., Duursma, R. and Mäkelä, A.: Estimating annual GPP, NPP and stem growth in Finland using summary models, *For. Ecol. Manage.*, 259, 524-533, 2010.
- Husson, O.: Redox potential (Eh) and pH as drivers of soil/plant/microorganism systems: a transdisciplinary overview pointing to integrative opportunities for agronomy, *Plant Soil*, 362, 389-417, 2013.
- 710 [Jobbágy, E. G. and Jackson, R. B.: The vertical distribution of soil organic carbon and its relation to climate and vegetation, \*Ecol. Appl.\*, 10, 423-436, 2000.](#)
- Kammer, A. and Hagedorn, F.: Mineralisation, leaching and stabilisation of 13C-labelled leaf and twig litter in a beech forest soil, *Biogeosciences*, 8, 2195-2208, doi:10.5194/bg-8-2195-2011, 2011.
- Kirschbaum, M. U. F.: Will Changes in Soil Organic Carbon Act as a Positive or Negative Feedback on Global Warming?, *Biogeochemistry*, 48, 21-51, 2000.
- 715 Kleja, D. B., Svensson, M., Majdi, H., Jansson, P., Langvall, O., Bergkvist, B., Johansson, M., Weslien, P., Truusb, L. and Lindroth, A.: Pools and fluxes of carbon in three Norway spruce ecosystems along a climatic gradient in Sweden, *Biogeochemistry*, 89, 7-25, 2008.
- 720 [Lehtonen, A., Linkosalo, T., Peltoniemi, M., Sievänen, R., Mäkipää, R., Tamminen, P., Salemaa, M., Nieminen, T., Tupek, B., and Heikkinen, J.: Testing steady states carbon stocks of Yasso07 and ROMUL models against soil inventory data in Finland, \*manuscript\*, 2016.](#)
- Lehtonen, A. and Heikkinen, J.: Uncertainty of upland soil carbon sink estimate for Finland, *Canadian Journal of Forest Research*, 45, 1-13, 2015a.
- Lehtonen, A., Palviainen, M., Ojanen, P., Kallioikoski, T., Nöjd, P., Kukkola, M., Penttilä, T., Mäkipää, R., Leppälammii-Kujansuu, J. and Helmisaari, H. -S.: Modelling fine root biomass of boreal tree stands using site and stand variables, *For. Ecol. Manage.*, 2015b.
- 725 Leppälammii-Kujansuu, J., Aro, L., Salemaa, M., Hansson, K., Kleja, D. B. and Helmisaari, H.: Fine root longevity and carbon input into soil from below-and aboveground litter in climatically contrasting forests, *For. Ecol. Manage.*, 326, 79-90, 2014.
- Lindén, A., G.: Swedish Geological Survey report, pp. 10, 2002, <http://resource.sgu.se/produkter/ae/ae118-beskrivning.pdf>
- 730 Liski, J., Tuomi, M. and Rasinmäki, J.: Yasso07 user-interface manual, Finnish Environment Institute, Helsinki, 2009.
- Liski, J., Lehtonen, A., Palosuo, T., Peltoniemi, M., Eggers, T., Muukkonen, P. and Mäkipää, R.: Carbon accumulation in Finland's forests 1922–2004—an estimate obtained by combination of forest inventory data with modelling of biomass, litter and soil, *Ann. For. Sci.*, 63, 687-697, 2006.
- 735 [Manzoni, S., Taylor, P., Richter, A., Porporato, A. and Ågren, G. I.: Environmental and stoichiometric controls on microbial carbon use efficiency in soils, \*New Phytol.\*, 196, 79-91, 2012.](#)

- McCormack, M. L., Crisfield, E., Raczka, B., Schnekenburger, F., Eissenstat, D. M. and Smithwick, E. A.: Sensitivity of four ecological models to adjustments in fine root turnover rate, *Ecol. Model.*, 297, 107-117, 740 2015.
- Metherell, A. K.: Century: Soil Organic Matter Model Environment: Technical Documentation: Agroecosystem Version 4.0, Colorado State University, 1993.
- [Merilä, P., Mustajärvi, K., Helmisaari, H., Hilli, S., Lindroos, A., Nieminen, T. M., Nöjd, P., Rautio, P., Salemaa, M. and Ukonmaanaho, L.: Above and below-ground N stocks in coniferous boreal forests in Finland: Implications for sustainability of more intensive biomass utilization, \*For. Ecol. Manage.\*, 311, 17-28, 2014.](#) 745
- Nalder, I. A. and Wein, R. W.: A model for the investigation of long-term carbon dynamics in boreal forests of western Canada: I. Model development and validation, *Ecol. Model.*, 192, 37-66, 2006.
- Olsson, M. T., Erlandsson, M., Lundin, L., Nilsson, T., Nilsson, Å. and Stendahl, J.: Organic carbon stocks in Swedish Podzol soils in relation to soil hydrology and other site characteristics., *Silva Fennica*, 43, 209-222, 750 2009.
- Ortiz, C., Karlton, E., Stendahl, J., Gärdenäs, A. I. and Ågren, G. I.: Modelling soil carbon development in Swedish coniferous forest soils—An uncertainty analysis of parameters and model estimates using the GLUE method, *Ecol. Model.*, 222, 3020-3032, 2011.
- Ortiz, C. A., Liski, J., Gärdenäs, A. I., Lehtonen, A., Lundblad, M., Stendahl, J., Ågren, G. I. and Karlton, E.: 755 Soil organic carbon stock changes in Swedish forest soils—A comparison of uncertainties and their sources through a national inventory and two simulation models, *Ecol. Model.*, 251, 221-231, 2013.
- Orwin, K. H., Kirschbaum, M. U., St John, M. G. and Dickie, I. A.: Organic nutrient uptake by mycorrhizal fungi enhances ecosystem carbon storage: a model-based assessment, *Ecol. Lett.*, 14, 493-502, 2011.
- Palosuo, T., Foereid, B., Svensson, M., Shurpali, N., Lehtonen, A., Herbst, M., Linkosalo, T., Ortiz, C., Rampazzo Todorovic, G., Marcinkonis, S., Li, C. and Jandl, R.: A multi-model comparison of soil carbon assessment of a coniferous forest stand, *Environmental Modelling & Software*, 35, 38-49, 2012. 760
- Parton, W. J., Schimel, D. S., Cole, C. V. and Ojima, D. S.: Analysis of Factors Controlling Soil Organic Matter Levels in Great Plains Grasslands, 51, 1173-1179, 1987.
- Parton, W., Ojima, D. and Schimel, D.: Environmental change in grasslands: Assessment using models, *Clim. Change*, 28, 111-141, 1994. 765
- [Parton, W.J., McKeown, R., Kirchner, V., and Ojima, D.: CENTURY Users' Manual, Natural Resource Ecology Laboratory, Colorado State University, Ft. Collins., 1992.](#)
- [Petersson, H. and Ståhl, G.: Functions for below-ground biomass of Pinus sylvestris, Picea abies, Betula pendula and Betula pubescens in Sweden, \*Scand. J. For. Res.\*, 21, 84-93, 2006.](#)
- 770 Raich, J. W., Parton, W. J., Russell, A. E., Sanford Jr, R. L. and Vitousek, P. M.: Analysis of factors regulating ecosystem development on Mauna Loa using the Century model, *Biogeochemistry*, 51, 161-191, 2000.
- Rantakari, M., Lehtonen, A., Linkosalo, T., Tuomi, M., Tamminen, P., Heikkinen, J., Liski, J., Mäkipää, R., Ilvesniemi, H. and Sievänen, R.: The Yasso07 soil carbon model—Testing against repeated soil carbon inventory, *For. Ecol. Manage.*, 286, 137-147, 2012.
- 775 Rapalee, G., Trumbore, S. E., Davidson, E. A., Harden, J. W. and Veldhuis, H.: Soil Carbon stocks and their rates of accumulation and loss in a boreal forest landscape, *Global Biogeochem. Cycles*, 12, 687-701, 1998.



- Rawls, W. J., Pachepsky, Y. A., Ritchie, J. C., Sobecki, T. M. and Bloodworth, H.: Effect of soil organic carbon on soil water retention, *Geoderma*, 116, 61-76, 2003. .
- 780 Rolff, C. and Ågren, G. I.: Predicting effects of different harvesting intensities with a model of nitrogen limited forest growth, *Ecol. Model.*, 118, 193-211, 1999.
- R Core Team R: A language and environment for statistical computing. R Foundation for Statistical Computing, Vienna, Austria. URL <http://www.R-project.org/>, 2014.
- Scharlemann, J. P., Tanner, E. V., Hiederer, R. and Kapos, V.: Global soil carbon: understanding and managing the largest terrestrial carbon pool, *Carbon Management*, 5, 81-91, 2014.
- 785 Schlesinger, W. H.: Carbon Sequestration in Soils, *Science*, 284, 2095-2095, 1999.
- Schmidt, M. W. I., Torn, M. S., Abiven, S., Dittmar, T., Guggenberger, G., Janssens, I. A., Kleber, M., Kogel-Knabner, I., Lehmann, J., Manning, D. A. C., Nannipieri, P., Rasse, D. P., Weiner, S. and Trumbore, S. E.: Persistence of soil organic matter as an ecosystem property, *Nature*, 478, 49-56, 2011.
- Six, J., Conant, R. T., Paul, E. A. and Paustian, K.: Stabilization mechanisms of soil organic matter: Implications 790 for C-saturation of soils, *Plant Soil*, 241, 155-176, 2002.
- SLU, 2011. Markinfo, <http://www-markinfo.slu.se/eng/index.html>
- Smith, P.: An overview of the permanence of soil organic carbon stocks: influence of direct human-induced, indirect and natural effects, *Eur. J. Soil Sci.*, 56, 673-680, 2005.
- Sollins, P., Homann, P. and Caldwell, B. A.: Stabilization and destabilization of soil organic matter: mechanisms 795 and controls, *Geoderma*, 74, 65-105, 1996.
- Stendahl, J., Johansson, M., Eriksson, E., Nilsson, Å. and Langvall, O.: Soil organic carbon in Swedish spruce and pine forests—differences in stock levels and regional patterns, *Silva Fenn.*, 44, 5-21, 2010.
- [Swedish Statistical Yearbook of Forestry. Official Statistics of Sweden, 370 p., Skogsstyrelsen, 2014.](#)
- Svensson, M., Jansson, P. and Kleja, D. B.: Modelling soil C sequestration in spruce forest ecosystems along a 800 Swedish transect based on current conditions, *Biogeochemistry*, 89, 95-119, 2008.
- Therneau, T. M. and Atkinson, E. J.: An introduction to recursive partitioning using the RPART routines, 1997.
- [Throop, H. L., Holland, E. A., Parton, W. J., Ojima, D. S. and Keough, C. A.: Effects of nitrogen deposition and insect herbivory on patterns of ecosystem level carbon and nitrogen dynamics: results from the CENTURY model, \*Global Change Biol.\*, 10, 1092-1105, 2004.](#)
- 805 Todd-Brown, K., Randerson, J. T., Hopkins, F., Arora, V., Hajima, T., Jones, C., Shevliakova, E., Tjiputra, J., Volodin, E., Wu, T., Zhang, Q. and Allison, S. D.: Changes in soil organic carbon storage predicted by Earth system models during the 21st century, *Biogeosciences*, 11, 2341-2356, 2014.
- Todd-Brown, K., Randerson, J. T., Post, W. M., Hoffman, F. M., Tarnocai, C., Schuur, E. A. G. and Allison, S. D.: Causes of variation in soil carbon simulations from CMIP5 Earth system models and comparison with 810 observations, *Biogeosciences*, 10, 1717-1736, 2013.
- Torn, M. S., Trumbore, S. E., Chadwick, O. A., Vitousek, P. M. and Hendricks, D. M.: Mineral control of soil organic carbon storage and turnover, *Nature*, 389, 170-173, 1997.
- Tuomi, M., Rasinmäki, J., Repo, A., Vanhala, P. and Liski, J.: Soil carbon model Yasso07 graphical user interface, *Environmental Modelling & Software*, 26, 1358-1362, 2011.

- 815 Tuomi, M., Thum, T., Järvinen, H., Fronzek, S., Berg, B., Harmon, M., Trofymow, J. A., Sevanto, S. and Liski, J.: Leaf litter decomposition—Estimates of global variability based on Yasso07 model, *Ecol. Model.*, 220, 3362-3371, 2009.
- ~~Tupek, B., Minkkinen, K., Pumpanen, J., Vesala, T. and Nikinmaa, E.: and dynamics in the boreal forest–mire ecotone, *Biogeosciences*, 12, 281-297, 2015.~~
- 820 Wiesmeier, M., Hübner, R., Spörlein, P., Geuß, U., Hangen, E., Reischl, A., Schilling, B., von Lützow, M. and Kögel-Knabner, I.: Carbon sequestration potential of soils in southeast Germany derived from stable soil organic carbon saturation, *Global Change Biol.*, 20, 653-665, 2014.
- Xia, M., Talhelm, A. F. and Pregitzer, K. S.: Fine roots are the dominant source of recalcitrant plant litter in sugar maple-dominated northern hardwood forests, *New Phytol.*, 2015.
- 825 Yurova, A. Y., Volodin, E. M., Agren, G. I., Chertov, O. G. and Komarov, A. S.: Effects of variations in simulated changes in soil carbon contents and dynamics on future climate projections, *Global Change Biol.*, 16, 823-835, 2010.
- Venables, W. N. and Ripley, B. D.: *Modern applied statistics with S-PLUS*, Springer Science & Business Media, 2013.
- 830 Zandonadi, D. B., Santos, M. P., Busato, J. G., Peres, L. E. P. and Façanha, A. R.: Plant physiology as affected by humified organic matter, *Theoretical and Experimental Plant Physiology*, 25, 13-25, 2013.

**Table 1.** Description of the Swedish Forest Soil Inventory (SFSI) data reduction of soil sorting of parent material and humus types; SFSI conversion estimate of soil classes of soil moisture to numerical representation of soil water content ~~according to observations from Tupek et al. (2015)~~; and SFSI conversion estimate of classes to numerical representation of soil texture (sand, silt, and clay content for sediments by Lindén (2002) and for tills by Albert Atterberg’s distribution of the different grain size fractions).

| <b>SORTING PARENT MATERIAL</b> |          | <b>HUMUS TYPE</b> |         | <b>MOISTURE</b> |           |            |
|--------------------------------|----------|-------------------|---------|-----------------|-----------|------------|
| SFSI                           | REDUCED  | SFSI              | REDUCED | SFSI            | SFSI      | NUMERIC    |
| Bedrock                        | Bedrock  | Moder             | No-peat |                 | Water     | Long-term  |
| Poorly sorted sediments        | Unsorted | Mor 1             | No-peat |                 | level (m) | moisture % |
| Tills                          | Unsorted | Mor 2             | No-peat | Dry             | <2        | 10         |
| Well sorted sediments          | Sorted   | Mull              | No-peat | Fresh           | 1-2       | 20         |
|                                |          | Mull-Moder        | Peat    | Fresh-moist     | <1        | 30         |
|                                |          | Peat              | Peat    | Moist           | <0.5      | 50         |
|                                |          | Peat-Mor          | Peat    |                 |           |            |

  

| <b>TEXTURE</b> |                      |        |        |        |        |        |
|----------------|----------------------|--------|--------|--------|--------|--------|
| SFSI           | NUMERIC<br>SEDIMENTS |        |        | TILLS  |        |        |
|                | Sand %               | Silt % | Clay % | Sand % | Silt % | Clay % |
| Bedrock        | 0                    | 0      | 0      | 0      | 0      | 0      |
| Boulder        | 0                    | 0      | 0      | 0      | 0      | 0      |
| Gravel         | 10                   | 0      | 0      | 10     | 0      | 0      |
| Coarse-sand    | 40                   | 5      | 0      | 40     | 5      | 0      |
| Sand           | 80                   | 10     | 0      | 45     | 10     | 0      |
| Fine-sand      | 70                   | 25     | 5      | 55     | 15     | 0      |
| Coarse-silt    | 50                   | 40     | 10     | 65     | 20     | 5      |
| Fine-silt      | 10                   | 75     | 15     | 55     | 35     | 10     |
| Clay           | 0                    | 65     | 35     | 0      | 85     | 15     |
| Peat           | 0                    | 0      | 0      | 0      | 0      | 0      |

**Table 2.** Descriptive characteristics (mean, confidence interval, 1<sup>st</sup>, 50<sup>th</sup>, and 99<sup>th</sup> percentile) of selected variables (n = 3230 samples). The values of the bulk density, cation exchange capacity, base saturation, C/N ratio, and pH are shown only for BC soil horizon (fixed 45–50 cm depth from the ground surface) due to the strong correlation to the total soil carbon stock. The [soil was cut off at 1 meter. The](#) productivity class (H100, m) is an approximation of the site fertility expressed as the height of trees at 100 years of age. Stand and understory biomass, and litter input are modelled values for approximated steady state conditions based on actual state measurements.

|                                                                      | Mean   | CI   | 1 <sup>st</sup> percentile | 50 <sup>th</sup> percentile | 99 <sup>th</sup> percentile |
|----------------------------------------------------------------------|--------|------|----------------------------|-----------------------------|-----------------------------|
| Total soil carbon stock (tC ha <sup>-1</sup> )                       | 93.24  | 1.95 | 17.02                      | 79.68                       | 308.68                      |
| Humus carbon stock (tC ha <sup>-1</sup> )                            | 33.29  | 1.17 | 3.89                       | 22.82                       | 176.66                      |
| Mineral soil carbon stock (tC ha <sup>-1</sup> )                     | 66.82  | 1.7  | 6.92                       | 54.81                       | 273.91                      |
| Depth of humus (cm)                                                  | 10.52  | 0.27 | 1                          | 8                           | 36                          |
| Depth of soil (cm)                                                   | 93.37  | 0.6  | 18                         | 99                          | 99                          |
| Stoniness (%)                                                        | 39.91  | 0.54 | 3.96                       | 42.37                       | 65.05                       |
| Bulk density of BC (g dm <sup>-3</sup> )                             | 1267.1 | 5.5  | 790.55                     | 1294.9                      | 1522.13                     |
| Cation exchange capacity of BC (mmol <sub>c</sub> kg <sup>-1</sup> ) | 23.94  | 1.28 | 1.53                       | 12.33                       | 203.25                      |
| Base saturation of BC (%)                                            | 36.44  | 1.02 | 4.33                       | 25.73                       | 100                         |
| C/N ratio of BC                                                      | 16.5   | 0.35 | 3.33                       | 14.98                       | 62.45                       |
| pH of BC                                                             | 5.17   | 0.02 | 4.36                       | 5.08                        | 7.26                        |
| Silt content (%)                                                     | 19.98  | 0.57 | 0                          | 15                          | 85                          |
| Clay content (%)                                                     | 3.16   | 0.25 | 0                          | 0                           | 35                          |
| Sand content (%)                                                     | 51.25  | 0.63 | 0                          | 55                          | 80                          |
| Long-term soil moisture (%)                                          | 22.36  | 0.2  | 10                         | 20                          | 30                          |
| Mean air temperature (°C)                                            | 4.63   | 0.09 | -0.44                      | 5.34                        | 8.47                        |
| Total precipitation (mm)                                             | 697.87 | 7.13 | 392.54                     | 637.11                      | 1154.55                     |
| Nitrogen deposition (kgN ha <sup>-1</sup> y <sup>-1</sup> )          | 7.17   | 0.14 | 2.35                       | 6.56                        | 17.67                       |
| Productivity class (H100, m)                                         | 23.61  | 0.21 | 12                         | 23                          | 36                          |
| Total stand biomass (tC ha <sup>-1</sup> )                           | 56.02  | 1.39 | 1.34                       | 51.14                       | 156.52                      |
| Total understory biomass (tC ha <sup>-1</sup> )                      | 2.69   | 0.05 | 0.96                       | 2.37                        | 6.02                        |
| Total litterfall input (tC ha <sup>-1</sup> )                        | 3.17   | 0.03 | 1.65                       | 3.07                        | 5.28                        |

**Table 3.** Description of models and data inputs relevant for this study.

| Model                                           | Yasso07                                                                                                          | Q                                                                                   | CENTURY v. 4.0 soil submodel                                                                                                            |
|-------------------------------------------------|------------------------------------------------------------------------------------------------------------------|-------------------------------------------------------------------------------------|-----------------------------------------------------------------------------------------------------------------------------------------|
| Time step                                       | Year                                                                                                             | Year                                                                                | Month                                                                                                                                   |
| <del>Parameters</del><br><u>Parametrization</u> | <del>General (world-wide litter bags)</del><br><u>Global</u>                                                     | <del>Seven Swedish regions</del><br><u>Scandinavian</u>                             | <del>Two forest sites (evergreen and deciduous)</del><br><u>Combined global with site specific</u>                                      |
| Carbon pools                                    | Labile (acid -, water -, and ethanol-soluble and non-soluble), recalcitrant (humus)                              | Cohorts (foliage, stems, branches, coarse roots, fine roots, "grass"), soil organic | Litter (surface structural and metabolic, belowground str. and met.), surface microbial, soil organic matter (active, slow and passive) |
| Biomass                                         | Biomass components estimated by allometric biomass functions and provided stand data for litter input estimation |                                                                                     |                                                                                                                                         |
| Litter amount                                   | Annual or monthly fractions of biomass components (species specific, same total litter inputs for all models)    |                                                                                     |                                                                                                                                         |
| Litter quality                                  | Litterature based solubilities                                                                                   | Estimated cohorts qualities                                                         | C/N ratios and lignin/N ratios                                                                                                          |
| Temperature air                                 | Annual mean, monthly amplitude                                                                                   | Annual mean                                                                         | Max and min monthly mean                                                                                                                |
| Precipitation                                   | <del>Monthly</del> <u>Annual</u> total                                                                           | –                                                                                   | Monthly total                                                                                                                           |
| Soil properties                                 | –                                                                                                                | –                                                                                   | Bulk density, sand, silt, and clay content                                                                                              |
| Soil depth (m)                                  | 1                                                                                                                | <del>+</del><br><u>–</u>                                                            | 0.2                                                                                                                                     |

**Table A1.** Parameter estimates and their standard errors of the  $f_{APAR}$  regressions with the stand basal area (BA,  $m^2 ha^{-1}$ ), and the  $f_{APAR70LAT}$  and  $f_{APAR70H100}$  regressions with the latitude (LAT,  $^\circ$ ) and with the productivity class (H100, m) for Scots pine, Norway spruce, and deciduous stands.

| $f_{APAR} = a * BA / (b + BA)$            | a±SE                               | b±SE                              | c±SE                 | adj. $R^2$ |
|-------------------------------------------|------------------------------------|-----------------------------------|----------------------|------------|
| pine                                      | 0.996±0.029                        | 11.754±0.811                      |                      | 0.85       |
| spruce                                    | 1.167±0.034                        | 10.668±0.870                      |                      | 0.86       |
| deciduous                                 | 1.129±0.064                        | 7.407±1.149                       |                      | 0.88       |
| $f_{APAR70LAT} = LAT / (a + b * LAT) + c$ |                                    |                                   |                      |            |
| pine                                      | -9.976e+03 ±3.691e+03 <sup>a</sup> | 1.430e+02 ±5.416e+01 <sup>b</sup> | 7.220e-01 ±1.819e-02 | 0.92       |
| spruce                                    | -2.689e+03 ±3.507e+03 <sup>c</sup> | 3.533e+01 ±5.025e+01 <sup>d</sup> | 9.654e-01 ±9.221e-02 | 0.74       |
| $f_{APAR70LAT} = a + b * LAT$             |                                    |                                   |                      |            |
| deciduous                                 | 1.363 ±0.282                       | -0.009 ±0.005 <sup>e</sup>        |                      | 0.26       |
| $f_{APAR70H100} = a * e^{(b/H100)}$       |                                    |                                   |                      |            |
| pine                                      | 0.85565 ±0.01917                   | -5.22016 ±0.40807                 |                      | 0.89       |
| spruce                                    | 0.96726 ±0.01009                   | -2.85354 ±0.21634                 |                      | 0.86       |
| deciduous                                 | 0.93991 ±0.02331                   | -2.63462 ±0.50325                 |                      | 0.51       |

$p < 0.001$  for all parameters except for <sup>a</sup> 0.023, <sup>b</sup> 0.024, <sup>c</sup> 0.461, <sup>d</sup> 0.498, and <sup>e</sup> 0.076.

**Table B1.** Parameter estimates and their standard errors for the coefficients of the dry weight biomass ( $\text{kg ha}^{-1}$ ) models with the fraction of absorbed radiation ( $y = ab^{f_{APAR}}$ ) for Scots pine, Norway spruce, and deciduous stands.

| $y = ab^{f_{APAR}}$ | species   | $a \pm \text{SE}$ | $b \pm \text{SE}$ | $adj. R^2$ |
|---------------------|-----------|-------------------|-------------------|------------|
| branch              | pine      | 610.23±21.043     | 121.592±5.967     | 0.917      |
|                     | spruce    | 877.265±34.535    | 54.157±2.457      | 0.918      |
|                     | deciduous | 289.719±26.464    | 155.506±15.838    | 0.892      |
| fineroot            | pine      | 422.031±12.675    | 20.51±0.914       | 0.836      |
|                     | spruce    | 316.675±13.816    | 15.186±0.78       | 0.799      |
|                     | deciduous | 452.632±27.715    | 14.499±1.032      | 0.823      |
| foliage             | pine      | 361.428±24.095    | 86.091±8.223      | 0.714      |
|                     | spruce    | 766.324±40.277    | 33.323±2.033      | 0.827      |
|                     | deciduous | 141.11±28.347     | 70.629±15.992     | 0.56       |
| root                | pine      | 703.163±26.166    | 183±9.62          | 0.918      |
|                     | spruce    | 628.686±32.37     | 113.435±6.665     | 0.903      |
|                     | deciduous | 358.635±33.267    | 149.85±15.506     | 0.888      |
| stem and bark       | pine      | 1793.215±83.818   | 253.676±16.658    | 0.889      |
|                     | spruce    | 974.029±72.348    | 229.024±19.259    | 0.856      |
|                     | deciduous | 971.587±97.632    | 160.858±18.015    | 0.876      |
| stump               | pine      | 231.701±10.273    | 214.429±13.394    | 0.893      |
|                     | spruce    | 170.77±10.331     | 129.219±8.907     | 0.877      |
|                     | deciduous | 79.779±8.388      | 215.511±25.165    | 0.874      |

$p < 0.001$  for all parameters.



**Table C1.** Parameter estimates and their standard errors for the coefficients of the forest ground-understory vegetation dry weight biomass ( $W$ , kg ha<sup>-1</sup>) models (Eq. C1) for functional types (1-dwarfshrubs, 2-herbs, 3-grasses, 4-mosses and 5-lichens) with intercept (a) and n number of predictors (b1- age (years), b2 – basal area (m<sup>2</sup> ha<sup>-1</sup>), b3 – annual air temperature (°C), b4 - latitude (°), b5 – H100 (height of trees at 100 years of age, m), b6 – H100 of spruce trees (m), b7 – H100 of pine trees (m), b8- pine dominance (0/1), b9-spruce dominance (0/1)). For the latin names of species included into understory functional types see Table S3.

| W            |       | a±SE        | b1±SE     | b2±SE      | b3±SE                  | b4±SE     | b5±SE      | b6±SE      | b7±SE     | b8±SE      | b9±SE     | adj. R <sup>2</sup> |
|--------------|-------|-------------|-----------|------------|------------------------|-----------|------------|------------|-----------|------------|-----------|---------------------|
| Above-ground | 1     | 24.28±0.32  | 0.13±0.01 | -0.43±0.02 |                        |           |            |            |           | 7.13±0.33  |           | 0.29                |
|              | 2     | -82.13±6.8  |           |            | -0.1±0.1 <sup>a</sup>  | 1.23±0.1  |            | 0.77±0.03  |           |            |           | 0.12                |
|              | 3     | 4.07±0.30   |           | -0.16±0.01 |                        |           |            | 0.27±0.01  |           | -1.36±0.15 |           | 0.21                |
|              | 4     | 32.9±0.62   |           |            |                        |           | -0.78±0.04 |            | 0.48±0.06 | 3.66±0.3   | 5.76±0.29 | 0.22                |
|              | 5     | 19.91±0.57  |           | -0.13±0.01 |                        |           |            | -0.45±0.02 |           | 6.31±0.29  |           | 0.25                |
|              | total | 43.68±0.29  | 0.12±0.01 | -0.41±0.01 |                        |           |            |            |           | 6.34±0.3   |           | 0.30                |
| Below-ground | 1     | -256.3±3.5  | 0.1±0.01  | -0.35±0.02 |                        | 5.05±0.06 |            |            |           | 8.56±0.35  |           | 0.75                |
|              | 2     | -89.34±7.85 |           |            | -0.03±0.1 <sup>b</sup> | 1.4±0.12  |            | 0.78±0.04  |           | -4.97±0.27 |           | 0.19                |
|              | 3     | 5.97±0.37   |           | -0.19±0.01 |                        |           |            | 0.32±0.01  |           | -1.78±0.19 |           | 0.21                |
|              | total | -251.9±3.3  |           | -0.2±0.01  |                        | 5.15±0.05 |            |            |           |            |           | 0.7                 |
| Total        |       | -222.7±4.0  | 0.12±0.01 | -0.44±0.02 |                        | 4.9±0.07  |            |            |           |            |           | 0.67                |

$p < 0.001$  for all parameters except for <sup>a</sup> $p = 0.44$ , and <sup>b</sup> $p = 0.84$ .

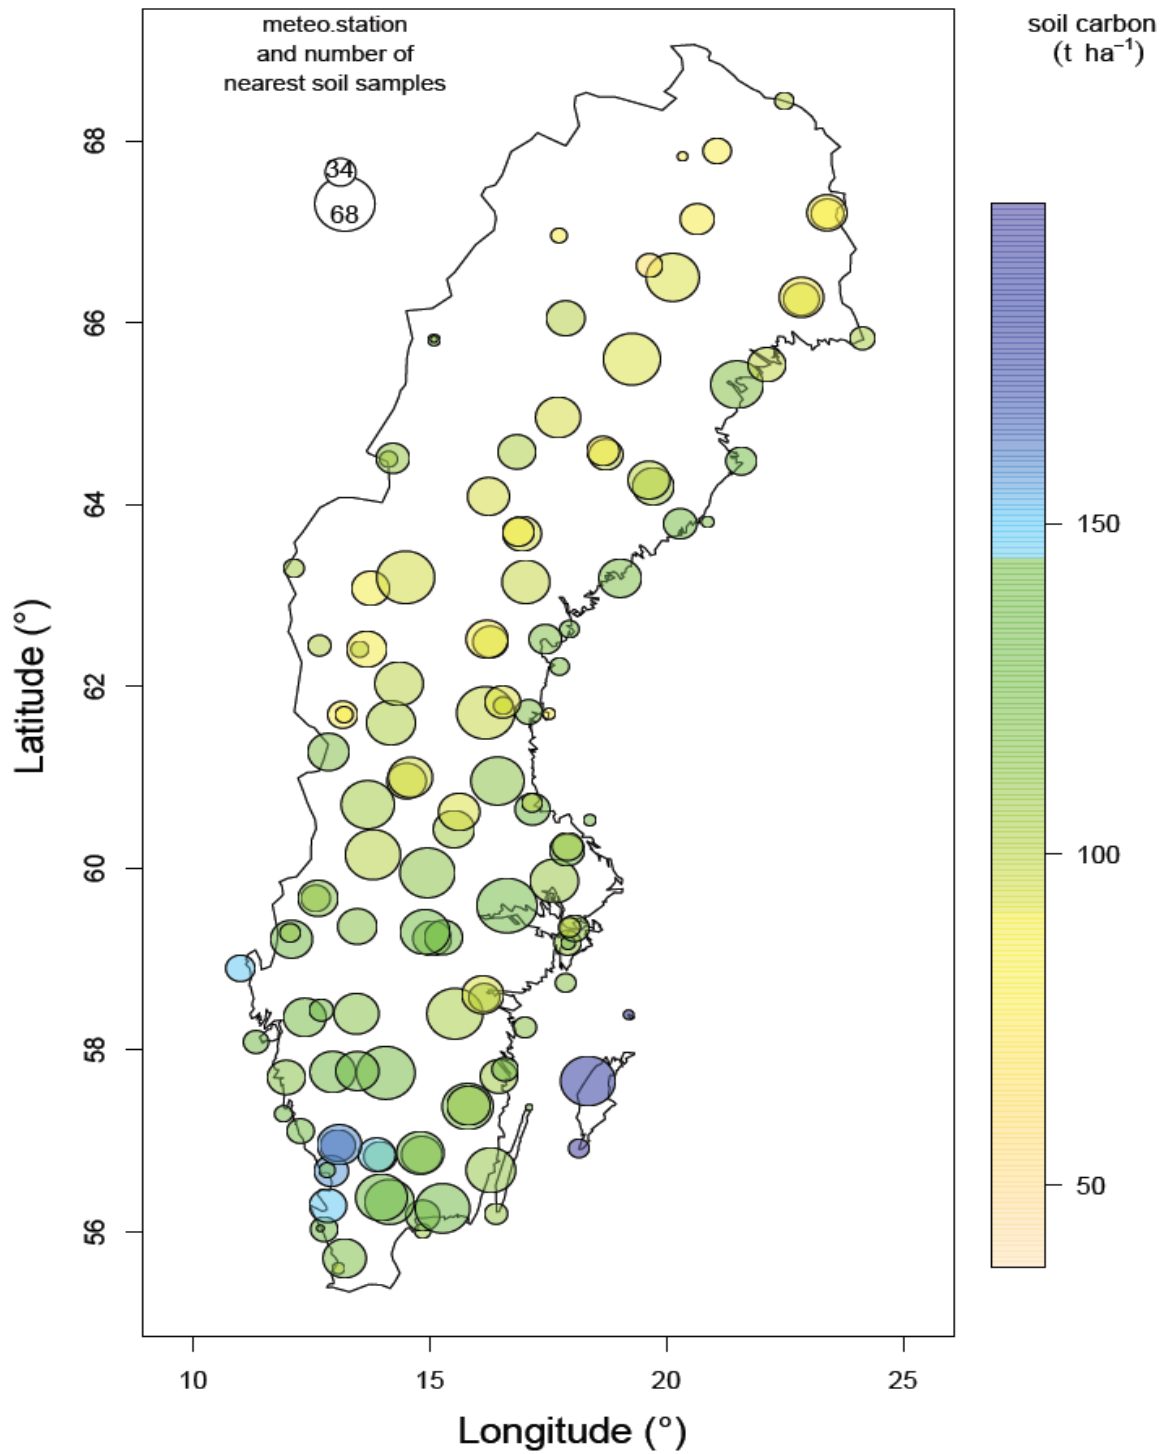

**Figure 1.** Geographical locations of meteorological stations with corresponding number of nearest soil samples (n, size of the circle) and their mean measured soil organic carbon stock (tC ha<sup>-1</sup>, color of the circle) across Sweden.

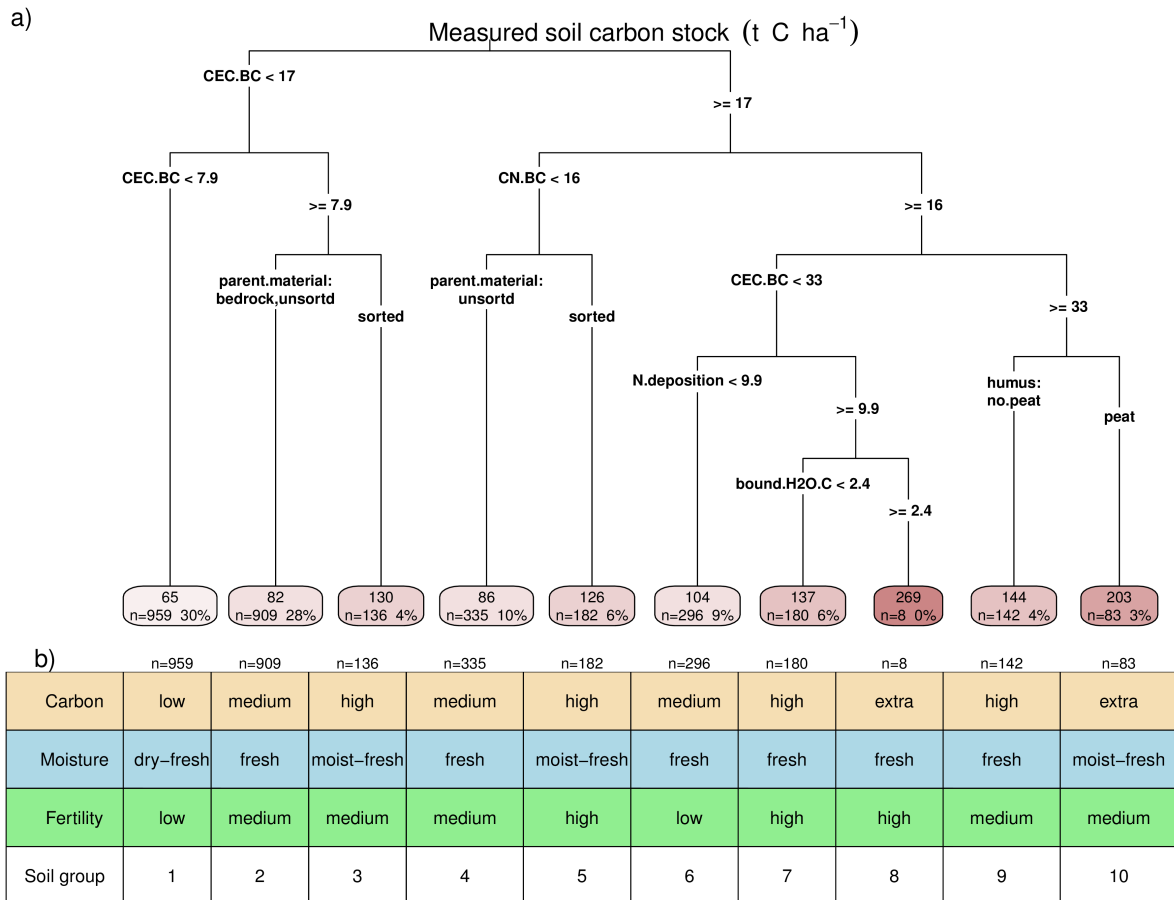

**Figure 2.** a) Classification/regression tree for the measured soil carbon stock ( $\text{tC ha}^{-1}$ ), soil physicochemical properties and site environmental characteristics; the cation exchange capacity of BC horizon (CEC.BC, ( $\text{mmol}_c \text{kg}^{-1}$ )), the C/N ratio (CN.BC), the nitrogen deposition (N.deposition  $\text{kgN ha}^{-1} \text{y}^{-1}$ ), the highly bound soil water of C horizon (bound.H2O.C, %), and soil class variables as type of sorted or unsorted soil parent material and humus type. Note that variables used to calculate the soil carbon stock (bulk density, carbon content, depth, and stoniness) were excluded from the regression tree analysis. The values in the leaves of the tree show for the distinct environmental conditions mean soil carbon stock ( $\text{tC ha}^{-1}$ ), number and percentage of samples. b) The interpretation of 10 physicochemical soil groups of the regression tree model into the levels of carbon, soil moisture, and fertility roughly increasing from left to right.

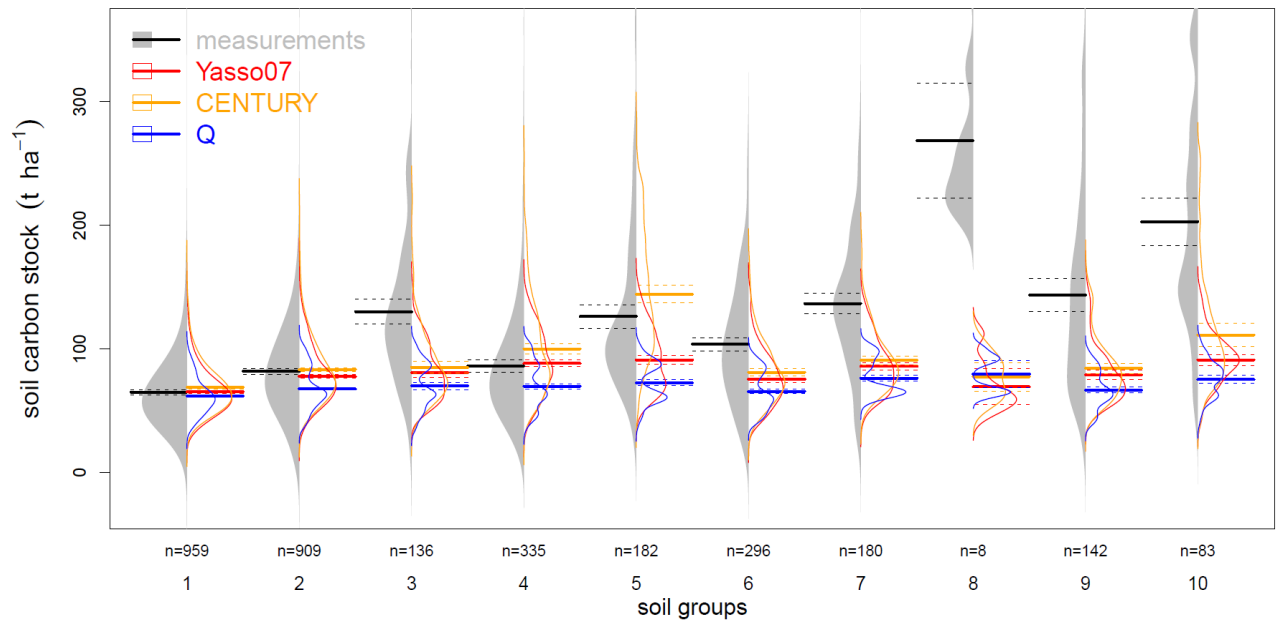

**Figure 3.** Bean plot of density functions for 10 physicochemical groups of the soil carbon ( $tC\ ha^{-1}$ ) measurements (grey fill) and estimates simulated by the soil carbon models Yasso07, CENTURY, and Q with the litter input derived from the steady state forest. The thin lines are the density distributions. The thick lines are the group means and dashed lines are their confidence intervals. The n is number of samples. For description of group levels of SOC stocks, moisture, and fertility see Fig.2 and Table S1.

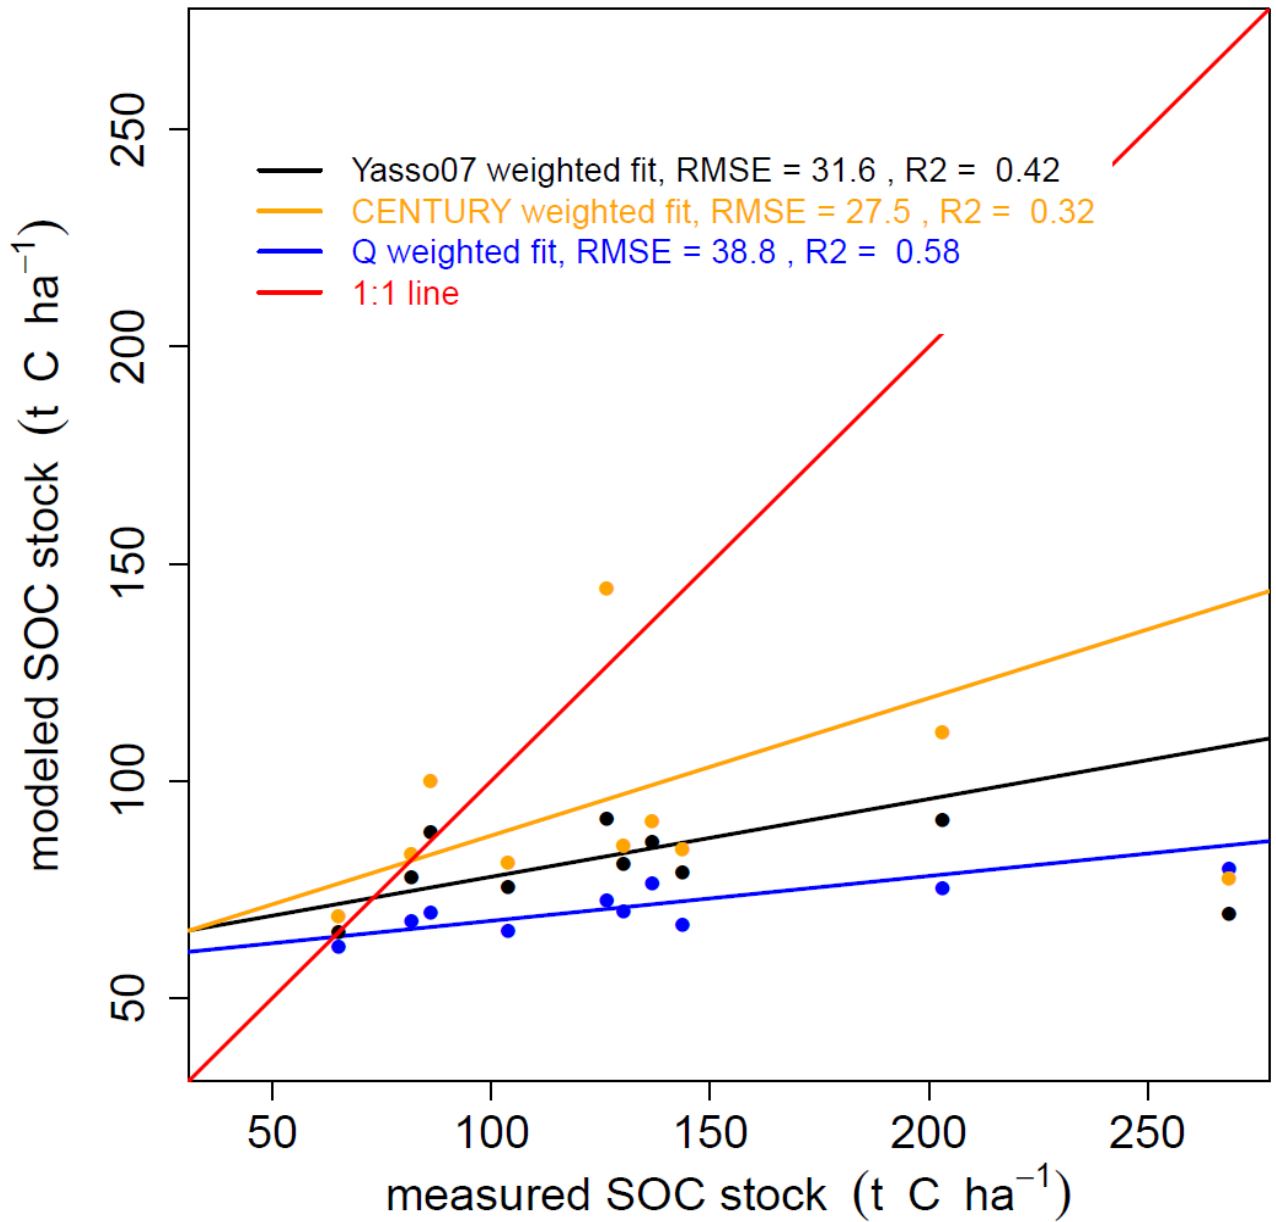

**Figure 4.** Scatter plot between mean measured and mean modeled soil organic carbon stocks (tC ha<sup>-1</sup>) for 10 physicochemical groups for Yasso07, CENTURY and Q models. Data were fitted with weighted linear regression (lines). The number of samples in each group was used as weights for fitting and also as weights for the weighted mean of squared differences between the modeled and measured values (MSE, tC ha<sup>-1</sup>). The RMSE is the square root of MSE. The  $r^2$  is the proportion of explained variance.

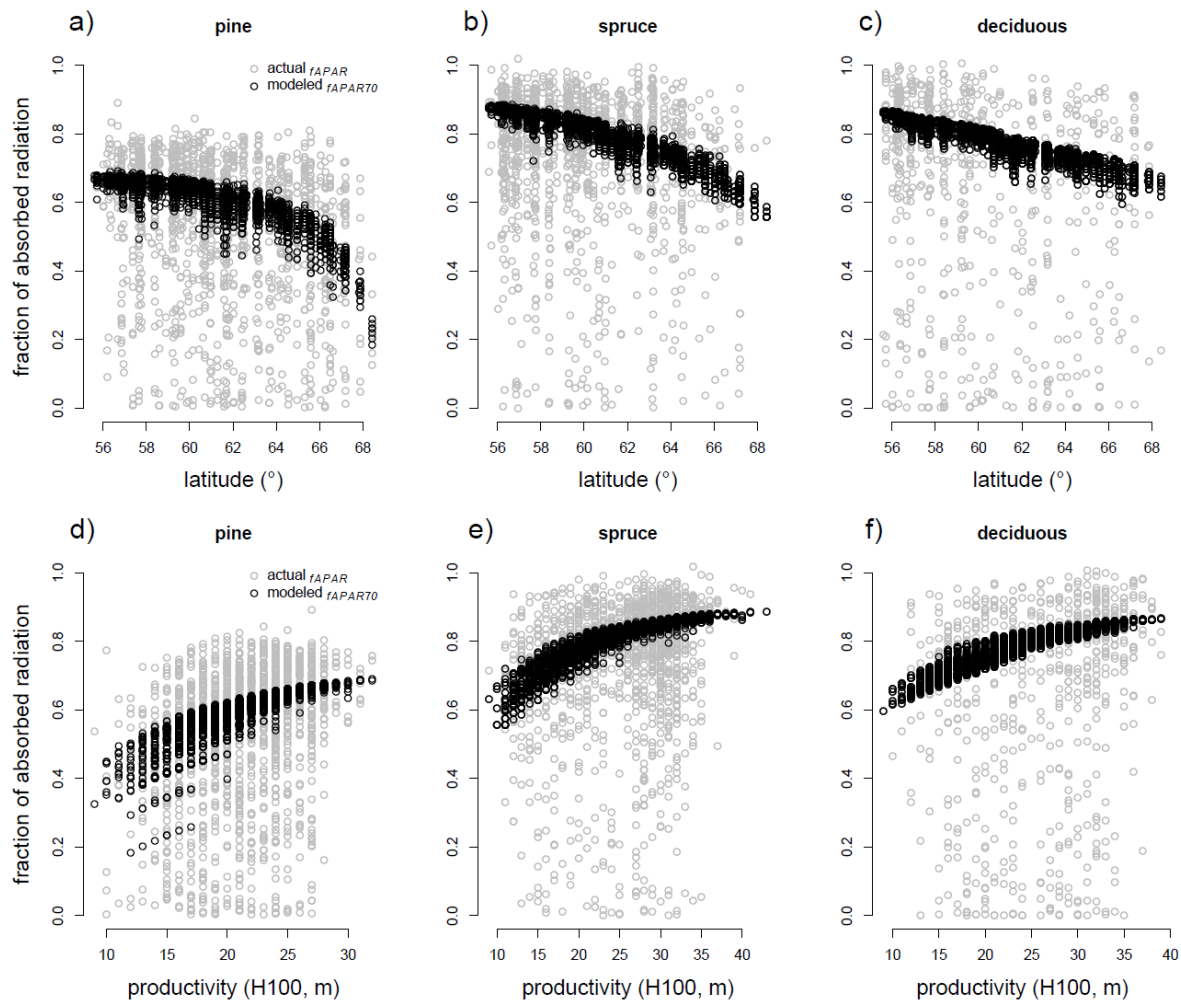

**Figure A1.** Actual state fraction of absorbed radiation ( $f_{APAR}$ , estimated as in Härkönen et al., 2010) (measured actual  $f_{APAR}$ ) and steady state  $f_{APAR}$  (modeled -max  $f_{APAR70}$ ) which was set to 70th percentile of maximum  $f_{APAR}$  for given species, latitudinal degree, and site productivity class. Panels a), b), and c) show relation between  $f_{APAR}$  and latitude ( $^{\circ}$ ) for forest stands dominant by Scots pine, Norway spruce and deciduous species, whereas panels d), e), and f) show relation between  $f_{APAR}$  and site productivity class (H100, height of dominant trees at 100 years in meters).

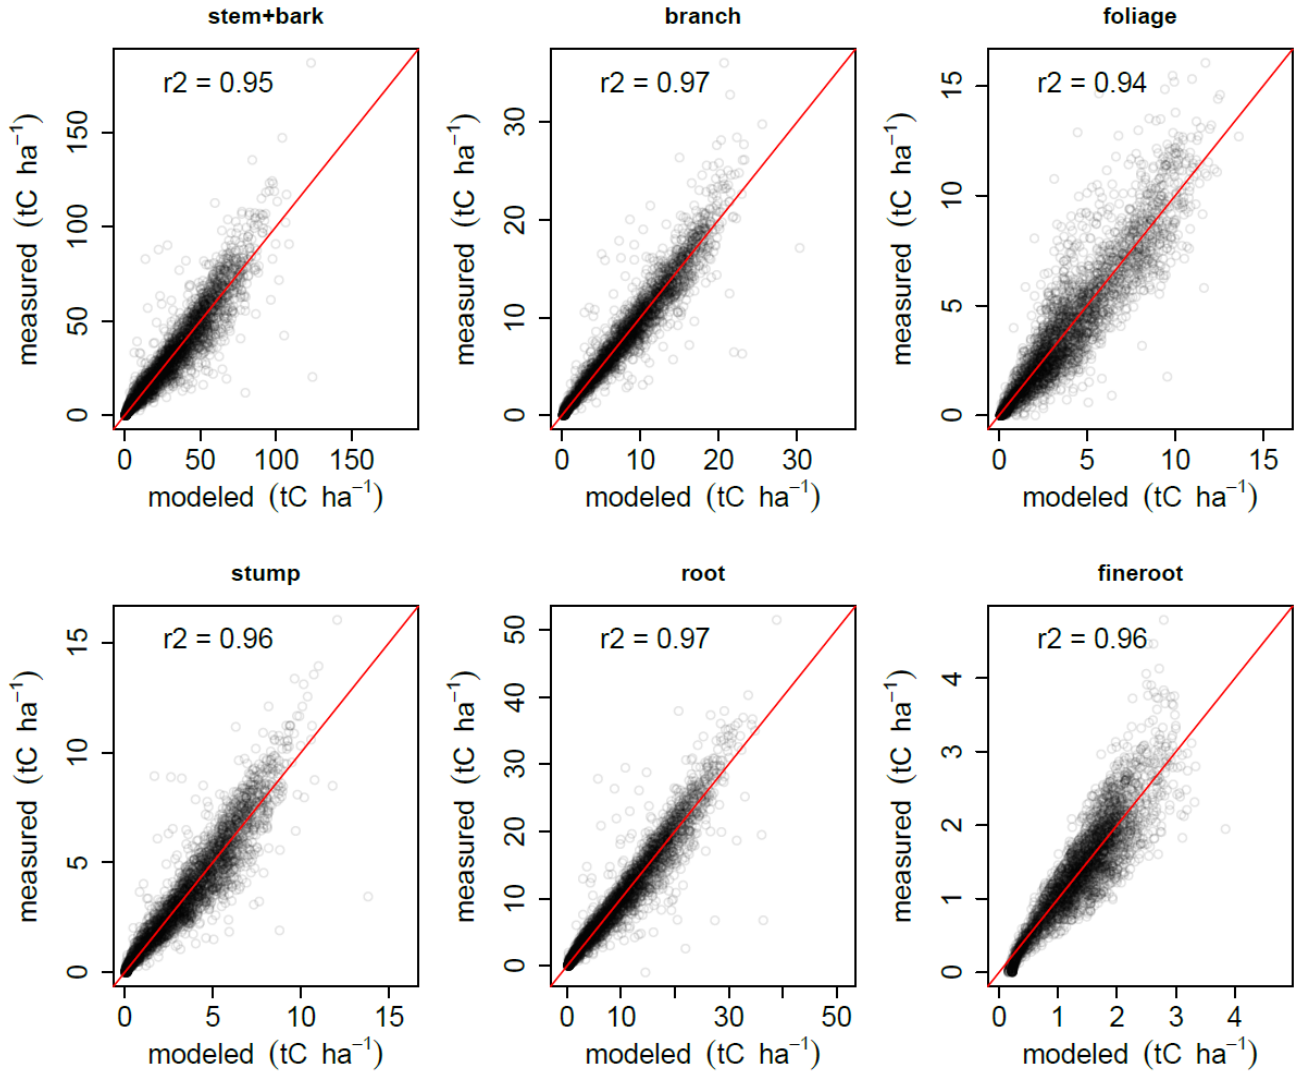

**Figure B1.** Scatter plots for the dry weight tree biomass components ( $W_i$ , tC ha<sup>-1</sup>) between "modelled" (estimated based on fraction of absorbed radiation,  $f_{APAR}$ , and our  $f_{APAR}$  models) and "measured" (estimated based on basic tree stand dimensions and allometric biomass models) and "modelled" (estimated based on fraction of absorbed radiation). The  $r^2$  values represent the coefficient of determination indicating how close the modeled values fit the measured values.

# **SUPPLEMENTARY MATERIAL: Underestimation of boreal soil carbon stocks by mathematical soil carbon models linked to soil nutrient status**

B. Ľupek<sup>1</sup>, C. A. Ortiz<sup>2</sup>, S. Hashimoto<sup>3</sup>, J. Stendahl<sup>2</sup>, J. Dahlgren<sup>4</sup>, E. Karlun<sup>2</sup>,  
and A. Lehtonen<sup>1</sup>

<sup>1</sup>Natural Resources Institute Finland, P.O. Box 18, 01301 Vantaa, Finland

<sup>2</sup>Swedish University of Agricultural Sciences, P.O. Box 7014, 75007 Uppsala, Sweden

<sup>3</sup>Forestry and Forest Products Research Institute, Tsukuba, Ibaraki 305-8687, Japan

<sup>4</sup>Swedish University of Agricultural Sciences, Skogsmarksgränd, 90183 Umeå, Sweden

*Correspondence to:* B. Ľupek (boris.tupek@luke.fi)

## **Content:**

**1 Model source codes** ... pp. 1-53

**2 Tables S1 ... S3** ... pp. 54-56

**3 Figures S1 ... S12** ... pp. 57-66

## **1 Source codes of the Yasso07, Q, and CENTURY model**

### **1.1 Yasso07 model**

[https://code.google.com/p/yasso07ui/source/browse/trunk/y07\\_subroutine.f90](https://code.google.com/p/yasso07ui/source/browse/trunk/y07_subroutine.f90)

```
MODULE yasso
```

```
IMPLICIT NONE
```

```
CONTAINS
```

```
  SUBROUTINE mod5c(a,t,cl,init,inf,s,leac,z)
```

```
    !components separately
```

```
    IMPLICIT NONE
```

```
    !***** &
```

```
    !GENERAL DESCRIPTION FOR ALL THE MEASUREMENTS
```

```
    !***** &
```

```
    !returns the model prediction for given parameters
```

```
    ! 1-16 matrix A entries: 4*k, 12*p
```

```
    !17-19 Climate-dependence parameters: b1, b2, g1
```

```
    !20-22 Leaching parameters: f1, f2, f3 IGNORED IN THE Y07-UI
```



```

!23-25 Woody parameters
!26-27 Humus parametens: kH, pH
REAL,DIMENSION(27),INTENT(IN) :: a !parameters
REAL,INTENT(IN) :: t,s,leac !time,size,leaching
REAL,DIMENSION(3),INTENT(IN) :: cl !climatic conditions
REAL,DIMENSION(5),INTENT(IN) :: init
REAL,DIMENSION(5),INTENT(IN) :: inf !infall
REAL,DIMENSION(5),INTENT(OUT) :: z
REAL,DIMENSION(5,5) :: m,mt,m2,mi
INTEGER :: i
REAL,PARAMETER :: pi=3.1415926535
REAL :: tem
REAL,DIMENSION(5) :: te
REAL,DIMENSION(5) :: z1,z2
!temperature annual cycle approximation
te(1)=cl(1)+4*cl(3)*(1/SQRT(2.0)-1)/pi
te(2)=cl(1)-4*cl(3)/SQRT(2.0)/pi
te(3)=cl(1)+4*cl(3)*(1-1/SQRT(2.0))/pi
te(4)=cl(1)+4*cl(3)/SQRT(2.0)/pi
tem=0.0
DO i=1,4 !Annual cycle, different models
  tem=tem+EXP(a(17)*te(i)+a(18)*te(i)**2.0)/4.0 !Gaussian
END DO
!Precipitation dependence
tem=tem*(1.0-EXP(a(19)*cl(2)/1000))
!Size class dependence - - no effect if sc = 0.0
m(1,1)=a(1)*tem*MIN(1.0,(1.0+a(23)*s+a(24)*s**2.0)**a(25))
m(2,2)=a(2)*tem*MIN(1.0,(1.0+a(23)*s+a(24)*s**2.0)**a(25))
m(3,3)=a(3)*tem*MIN(1.0,(1.0+a(23)*s+a(24)*s**2.0)**a(25))
m(4,4)=a(4)*tem*MIN(1.0,(1.0+a(23)*s+a(24)*s**2.0)**a(25))
!Calculating matrix M, normal
m(2,1)=a(5)*ABS(m(2,2))
m(3,1)=a(6)*ABS(m(3,3))
m(4,1)=a(7)*ABS(m(4,4))
m(5,1)=0.0
m(1,2)=a(8)*ABS(m(1,1))
m(3,2)=a(9)*ABS(m(3,3))

```

```

m(4,2)=a(10)*ABS(m(4,4))
m(5,2)=0.0
m(1,3)=a(11)*ABS(m(1,1))
m(2,3)=a(12)*ABS(m(2,2))
m(4,3)=a(13)*ABS(m(4,4))
m(5,3)=0.0
m(1,4)=a(14)*ABS(m(1,1))
m(2,4)=a(15)*ABS(m(2,2))
m(3,4)=a(16)*ABS(m(3,3))
m(5,4)=0.0
m(5,5)=a(26)*tem !no size effect in humus
DO i=1,4
  m(i,5)=a(27)*ABS(m(i,i)) !mass flows EWAN -> H
END DO
!Leaching
m(1,1)=m(1,1)+leac*c1(2)/1000
m(2,2)=m(2,2)+leac*c1(2)/1000
m(3,3)=m(3,3)+leac*c1(2)/1000
m(4,4)=m(4,4)+leac*c1(2)/1000
!DY solution starts here...
DO i=1,5
  z1(i)=DOT_PRODUCT(m(:,i),init)+inf(i)
END DO
mt=m*t
CALL matrixexp(mt,m2)
DO i=1,5
  z2(i)=DOT_PRODUCT(m2(:,i),z1)-inf(i)
END DO
CALL inverse(m,mi)
DO i=1,5
  z1(i)=DOT_PRODUCT(mi(:,i),z2)
END DO
z=z1
CONTAINS
  SUBROUTINE matrixexp(a,b)
  IMPLICIT NONE
  !returns approximated matrix exponential

```

```

!Taylor approximation.. another algorithm perhaps?
REAL,DIMENSION(5,5),INTENT(IN) :: a
REAL,DIMENSION(5,5),INTENT(OUT) :: b
REAL,DIMENSION(5,5) :: c,d
REAL :: p,normiter
INTEGER :: i,q,j
q=10
b=0.0
DO i=1,5
  b(i,i)=1.0
END DO
normiter=2.0
j=1
CALL matrix2norm(a, p)
DO
  IF(p< normiter)THEN
    EXIT
  END IF
  normiter=normiter*2.0
  j=j+1
END DO
c=a/normiter
b=b+c
d=c
DO i=2,q
  d=MATMUL(c,d)/REAL(i)
  b=b+d
END DO
DO i=1,j
  b=MATMUL(b,b)
END DO
END SUBROUTINE matrixexp
SUBROUTINE matrix2norm(a,b)
IMPLICIT NONE
!returns matrix 2-norm with cartesian vector x,
!| | x| | = 1
!square matrix input (generalize if necessary)

```

```

REAL,DIMENSION(5,5),INTENT(IN) :: a
REAL,INTENT(OUT) :: b
INTEGER :: n,i
n=SIZE(a(1,:))
b=0.0
DO i=1,n
    b=b+SUM(a(:,i))**2.0
END DO
b=SQRT(b)
END SUBROUTINE matrix2norm
SUBROUTINE inverse(a,b)
IMPLICIT NONE
    !returns an inverse of matrix a
    !(column elimination strategy)
    !input has to be a square matrix, otherwise erroneous
REAL,DIMENSION(5,5),INTENT(IN) :: a
REAL,DIMENSION(5,5),INTENT(OUT) :: b
REAL,DIMENSION(5,5) :: c
INTEGER :: n,m,i,j
n=SIZE(a(1,:))
m=SIZE(a(:,1))
IF (m/=n) THEN
    WRITE(*,*) " Does not compute."
    WRITE(*,*) " No square matrix input."
    WRITE(*,*) " Error in function: inverse"
ELSE
!    ALLOCATE(b(n,n),c(n,n))
    c=a
    b=0.0
    DO i=1,n !setting b a unit matrix
        b(i,i)=1.0
    END DO
    DO i=1,n
        !what if diagonal values are zeros?
        IF(c(i,i)==0.0)THEN!case of singlar matrix, is it?
            b(i,:)=0.0
            c(i,:)=0.0

```

```

        b(:,i)=0.0
        c(:,i)=0.0
        !          b(i,i)=1.0
        !          c(i,i)=1.0
ELSE
        b(i,:)=b(i,+)/c(i,i)
        c(i,:)=c(i,+)/c(i,i)
END IF
DO j=1,i-1
        b(j,:)=b(j,)-b(i,)*c(j,i)
        c(j,:)=c(j,)-c(i,)*c(j,i)
END DO
DO j=i+1,n
        b(j,:)=b(j,)-b(i,)*c(j,i)
        c(j,:)=c(j,)-c(i,)*c(j,i)
END DO
END DO
IF (c(n,n)==0.0) THEN
        b(n,:)=0.0
        b(:,n)=0.0
        !          b(n,n)=1.0
ELSE
        b(n,:)=b(n,+)/c(n,n)
END IF
!now, b is supposed to be the requested inverse
END IF
END SUBROUTINE inverse
END SUBROUTINE mod5c
END MODULE yasso

```

## 1.2 Q model

```

!***** &
!      Main program to calculate carbon store in forest soils.
!      SPRUCE
!***** &
!      Edited by Carina Ortiz, Version 2015-11-16

```

```

! Understory vegetation, variable temp, variable litter
  real, dimension(1) :: yr(0:0),carb(0:0),
    + totc(0:0),u0y(0:0)
  real, dimension(1,5) :: lit(0:0,5),cssn(0:0,1),
    + vtemp(0:0,1:244),cssnund(0:0,1),ssi0b(0:0,1),
    + ssi0scr(0:0,1),ssi0s(0:0,1),alfanss(0:0,1),
z(0:0,1),u0(0:0,1)
* ,ssi0b(0:0,5),ssi0scr(0:0,5),ssi0s(0:0,5)
* + ssi0scr(0:0,5),cssnund(0:0,5)
  real, dimension (244,0:0) :: nefr !(jj,ii)
  real, dimension (244,0:0) :: br !(jj,ii)
  real, dimension (244,0:0) :: st !(jj,ii)
  real, dimension (244,0:0) :: stpcr !(jj,ii)
  real, dimension (244,0:0) :: und !(jj,ii)
  real, dimension (244,0:0) :: vtemp !(jj,ii)
! needlesfineroots jj columns(MCSIMS), rows(yr) ii
  real i0, u0sum, ts
  character (len=10) :: dumtext
  integer :: r
! Monte Carlo Simulations
! Read file with parameter setups
! Open parameter file
OPEN (unit=111, file='lparvaraccregsprucemean.dat',status='old')
  read(111,*) dumtext
! Open output file
open(unit=11, file='q_soil.dat')
! Read matrix file with litter production in N simulations
! (Monte Carlo), each fraction one separate file
  open(unit=1111,file='biom70reg1SpruceNeedlesandfineroots.dat',
    + status='old')
  read(1111,*) dumtext
  read(1111,*) nefr
open(unit=11111,file='biom70reg1SpruceBranches.dat',
  + status='old')
  read(11111,*) dumtext
  read(11111,*) br

```

```

open(unit=1111111,file='biom70reg1SpruceStumpCoarseroots.dat',
+   status='old')
  read(1111111,*) dumtext
  read(1111111,*) stpcr
  open(unit=1111111,file='biom70reg1SpruceStem.dat',
+   status='old')
  read(1111111,*) dumtext
  read(1111111,*) st
open(unit=11111111,file='biom70reg1SpruceUnderveg.dat ',
+   status='old')
  read(11111111,*) dumtext
  read(11111111,*) und
! Read variable temperature file yearly means
open(unit=1, file='reftempreg1spruce.dat',status='old')
  read(1,*) dumtext
  read(1,*) vtemp
! Estimates the mean temperature for steady state
*   ts=ts+vtemp
*   ii=ii+1
*   temp=ts/ii !mean temp
! Main loop Number of Monte Carlo simulations
DO ii=1,244
read(111,*) q0n,q0w,e0,etal1,beta,maxb,maxs,u00,u01
! Temperature for steady state.
! First row temperature, only for one step
do jj=0,0!first row is dumtext !
  vtempsite(jj,ii) = vtemp(ii,jj)!
  u0(jj,1)=u00+u01*vtempsite(jj,ii)
  do i=0,0
    u0y(i)=u00+u01*vtempsite(jj,ii) ! each year new temp.
  enddo
enddo
! Set some parameters for decomposition functions
ssi0n=0
fC=0.5
do jj=0,0
alfanss(jj,1)=fC*beta*etal1*u0(jj,1)*q0n**beta

```

```

z(jj,1)=(1.-e0)/(beta*etall*e0)
end do
! Create litter matrix
do jj=0,0!first row is dumtext
  lit(jj,1) = nefr(ii,jj)
  !litter fraction 1 needles & fine roots
  lit(jj,2) = br(ii,jj)
  !litter fraction 2 branches & roots
  lit(jj,3) = st(ii,jj)
  !litter fraction 3 stems
  lit(jj,4) = stpcr(ii,jj)
  !litter fraction 4 stump & coarse roots
  lit(jj,5) = und(ii,jj)
  !litter fraction 5 understorey
enddo
!Calculates steady state litter fraction for needles
do jj=0,0
  cssn(jj,1)=(lit(jj,1))*1/(alfanss(jj,1)*(z(jj,1)-1))
enddo
!Steady state understorey vegetation
do jj=0,0
  cssnund(jj,1)=(lit(jj,5))*1/(alfanss(jj,1)*(z(jj,1)-1))
enddo
!Steady state input branches
do jj=0,0
  ssi0b(jj,1)=lit(jj,2)
enddo
!Steady state input stump and coarse roots
do jj=0,0
  ssi0scr(jj,1)=lit(jj,4)
enddo
!Steady state input stem
do jj=0,0
  ssi0s(jj,1)=lit(jj,3)
enddo
! Fixed parameters
fC=0.5

```



```

!      Call for soil decomposition model
      call soildecomp(fC,u0,u0y,etall,e0,beta,ssi0b,ssi0s,ssi0scr,
+          q0n,cssn,q0w,maxb,maxs,itend,lit,carb,nitr,
+          cssnund)
! WRITE TO OUTPUTFILE
* do i=0,0
* write(11,*) carb(i)
* enddo
! End main loop
* enddo !input litter loop
ENDDO !parameter loop
*! Close Temperature file
close(unit=1)
! Close litterfiles
close(unit=1111)
      close(unit=11111)
close(unit=111111)
close(unit=1111111)
close(unit=11111111)
! Close OUTPUT document
close(unit=11)
! Close parameterrange file
close(unit=111)
!***** &
!      Subroutine to calculate carbon stores in forest soils
!      Version 2015-11-16
!      Undervegetation, variable temp, variable litter
      subroutine soildecomp (fC,u0,u0y,etall,e0,beta,ssi0b,ssi0s,
+ ssi0scr,q0n,cssn,q0w,maxb,maxs,itend,lit,carb,nitr,cssnund)
      real, dimension(1) :: carb(0:0), totc(0:0),
+          u0y(0:0)
      real, dimension(1,5) :: lit(0:0,5), vtemp(0:0,1:225)
      real, dimension (225,0:0) :: nefr !(jj,ii)
real, dimension (225,0:0) :: br !(jj,ii)
real, dimension (225,0:0) :: st !(jj,ii)
real, dimension (225,0:0) :: stpcr !(jj,ii)
real, dimension (225,0:0) :: und !(jj,ii)

```

```

real, dimension (225,0:0) :: vtemp !(jj,ii)
* needlesfineroots jj columns(MCSIMS), rows(yr) ii
    real i0, u0sum, t, gnv, gnold, gbv, gbold, gsv, gsold
    dimension gn(0:0), gb(0:0), gs(0:0)
    dimension hn(0:0), hb(0:0), hs(0:0), qn(0:0)
*    real, dimension (101,100):: a(0:100,1:100)
    integer :: r
!    Litter and OM decomposition parameters
z=(1.-e0)/(beta*etall*e0)
zn=1./(beta*etall*e0)
alfa =fC*beta*etall*u0*q0w**beta
!Alfa with constant temp!
alfav=fC*beta*etall*q0w**beta
!Alfa with variable temperature vtemp!
    alfan=fC*beta*etall*u0*q0n**beta
    !Old alfa with constant temp!
alfanv=fC*beta*etall*q0n**beta
!Alfa with variable temperature vtemp!
    alfa0n=fN/fC-(beta*etall*e0+e0-1)*(fn/fc-r0)/(beta*etall*e0-1)
!    Old SOM from steady state org.mat. is calculated and summed
    do i=0,0
u0sum=0
do k=1,i !No decomposition the same year as we assess
    u0sum=u0sum+u0y(k)
    !Integral of u0 when using variable temperature
enddo
gnold= (1+alfanv*u0sum)**(1-(1-e0)/
!Decomposition of old needles
    + (e0*etall*beta))
t=(i)
!    Call for decomposition fuctions
!    that calculates the remaining mass of the o.m.
    gsold=gold(t,maxs,alfa,alfav,u0sum,z)
gbold=gold(t,maxb,alfa,alfav,u0sum,z)
!    Old SOM is summed
    carb(i)=
    + gnold*cssn !part of o.m left and the steady state input

```

```

in fraction
  + +gnold*cssnund
  + +gbold*ssi0b
  + +gsold*ssi0s
  + +gsold*ssi0scr
write(11,*) carb (i)
enddo
! New SOM from is calculated
! and summed with the olds steady state carbon
do i=0,0
  do mt=0,i
    u0sum=0
    if (i.ne.mt) then
      !No decomposition the same year as we assess
      do k=(mt+1),i
        u0sum=u0sum+u0y(k)
        !Integral of u0 when using variable temperature
      enddo
    endif
    gnv=1./(1.+alfanv*u0sum)**z
    !Decomposition of new needles!
    t=(i-mt)
    gbv=gbran(t,maxb,alfa,alfav,u0sum,z)
    !Decomposition of new branches!
    if (gbv.gt.1) then
      gbv=1
    endif
    gsv=gbran(t,maxs,alfa,alfav,u0sum,z)
    !Decomposition of new stems!
    if (gbs.gt.1) then
      gbs=1
    endif
! SOM from old steady state and new litter is summed
carb(i)=carb(i)+
  + lit(mt,1)*gnv+
  + lit(mt,2)*gbv+
  + (lit(mt,3)+lit(mt,4))*gsv+

```

```

+     lit(mt,5)*gmv
enddo
    enddo
!     Litter fractions are 1=needles 2=branches
!     3=stem 4=stump & course roots 5=under vegetation
9991  continue
    return
999  end
!     Function for decomposition of old steady state carbon
!     for branches (2) and stems(3+4)
    function gold(t,itmax,alfa,alfav,u0sum,z)
        !Decomposition of old branches & stem!
tmax=real(itmax)
if (t.le.tmax) then
gold=-2.*(1+alfav*u0sum)**(2.-z)/(tmax*alfa**2*(1.-z)*(2.-z))
    +2.*(1+alfav*u0sum)**(3.-z)-1.)
    + / (tmax**2*alfa**3*(1.-z)*(2.-z)*(3.-z))
    + + (1.-t/tmax)**3*tmax/3.- (1.-t/tmax)**2/(alfa*(1.-z))
    + +2.*(tmax-t)/(tmax**2*alfa**2*(1.-z)*(2.-z))
return
else
gold=-2.*(1+alfav*u0sum)**(2.-z)/(tmax*alfa**2*(1.-z)*(2.-z))
    + 2.*(1+(alfav*u0sum-alfa*(tmax)))**(3.-z)-
    + (1+alfav*u0sum)**(3.-z))
    + / (tmax**2*alfa**3*(1.-z)*(2.-z)*(3.-z))
return
endif
end
    function gbran(t,itmax,alfa,alfav,u0sum,z)
        !Decomposition of new branches!
tmax=real(itmax)
if (t.le.tmax) then
gbran=2.*((1+alfav*u0sum)**(1.-z)-(1.-t/tmax))/(tmax*alfa*(1.-z))
+ +2.*(1-(1+alfav*u0sum)**(2.-z))/((tmax**2)*(alfa**2)*
+ (1.-z)*(2.-z))+ (1.-t/tmax)**2
    return
else

```

```

    gbran=2.*(1.+alfav*u0sum)**(1.-z)/(tmax*alfa*(1.-z))
+ +2.*((1.+(alfav*u0sum-alfa*tmax))**(2.-z)-
+ (1.+alfav*u0sum)**(2.-z))/
+ ((tmax**2)*(alfa**2)*(1.-z)*(2.-z))
    return
  endif
end

```

### 1.3 CENTURY model

```

#####
##
##   SOC sub-model of the CENTURY version 4.0
##
#####
#
# Coded in R by Shoji Hashimoto (shojih@ffpri.affrc.go.jp)
# edited by Boris Tupek (boris.tupek@luke.fi)
# original model available at
# https://www.nrel.colostate.edu/projects/century/obtain2.htm
#####
# Related source files in the original CENTURY model
# Please see /original/source/*.f
#
# adjlig.f, anerob.f, csa_detiv.f, csa_main.f, cycle.f, declig.f
# decomp.f, eachyr.f, h2olos.f, litdec.f, partit.f
# pevap.f, prelim.f, simsom.f, somdec.f, tcalc.f
# wdeath.f, woodec.f, and so on.
#
#####
# Simplification:
#
# only for forest ecosystem (not grass, savanna etc)
# no irrigation
# not floating C/N ratio for plant organs.
# cnr_max=cnr_min=cnr_initial in tree.100
# no mineral N cycling: constant N at surface soil

```

```

# (xNmineral in f_site.100)
# drain=1, anerb=1
# ideo=2 in fix.100 (water function for calculating defac)
# no CO2 effect
#
#####
# A bug in the original CENTURY
#
# a bug (please see calfc_wtpt function below)
# The difference in results was small,
# but it depends on the climate and soil.
#
# BFix<-0: with bug as the original CENTURY
# BFix<-1: the bug was fixed
rm(list=ls())
options(digits=12)
BFix<-1
#DEFINE number of years for spinup simulations!
TSTART=1
TEND=500 # 5000 for steady state
#####
# Read data
#####
# parameters from fix.100 in the original CENTURY
# environments (site specific temperature,
# precipitation from SMHI), site.100 in the original CENTURY
# parameters describing site conditions(site specific sand,
# silt,clay,bulk density from SFSI data)
# see file site.100 in the original CENTURY
# parameters describing tree,
# see tree.100 in the original CENTURY
# "AND H_J ANDREWS" for conifers
# "Coweeta" for deciduous
# initial conditions from site.100
## READ SITE SPECIFIC data #####
#general parameters (fix.100)
parameters.names<-c("adepl","adep2","adep3","adep4","adep5",

```

```

"adep6", "adep7", "adep8", "adep9", "adep10",
"awt11", "awt12", "awt13", "awt14", "awt15",
"awt16", "awt17", "awt18", "awt19", "awt110",
"damr11", "damr21", "damrmn", "dec11,
Asrfstr_0", "dec21, Asrfmet_0", "dec12,
Abelstr_0", "dec22, Abelmet_0", "dec31,
Asrfmic_0", "dec32, kactv_0", "dec5, kslow_0",
"dec4, kpass_0", "Edepth", "Elitst",
"Fwloss1", "Fwloss2", "Fwloss3", "Fwloss4",
"ntspm, CYCL", "OMLECH(1)", "OMLECH(2)",
"OMLECH(3)", "P1CO2A1", "P1CO2A2", "P1CO2B1",
"P1CO2B2", "P2CO2", "P3CO2", "pabres",
"Peftxa", "Peftxb", "pligst1", "pligst2",
"PMCO21", "PMCO22", "PmnTmp", "PmxBio",
"PmxTmp", "PS1CO21", "PS1CO22", "PS1S31",
"PS1S32", "PS2S31", "PS2S32", "Rsplig",
"spl1", "spl2", "strmax1", "strmax2",
"teff1", "teff2", "teff3", "Tmelt1", "Tmelt2")
parameters.values <-c(15,15,15,15,30,30,30,30,0,0,0.8,
0.6,0.4,0.3,0.2,0.2,0.2,0.2,0,0,0,
0.02,15,3.9,14.8,4.9,18.5,6,7.3,
0.2,0.0045,0.2,0.4,0.8,0.8,0.65,
0.9,4,0.03,0.12,60,0.6,0.17,0,
0.68,0.55,0.55,100,0.25,0.75,3,
3,0.55,0.55,0.004,600,-0.0035,
0.45,0.55,0.003,0.032,0.003,
0.009,0.3,0.85,0.013,5000,
5000,0,0.125,0.07,-8,4)
parameters <- data.frame(V1=parameters.values,
V2=parameters.names)
#initial parameters (site.100)
init.names<-c("xsrfstr", "xsrfmet", "xsrfmic", "xbelstr",
"xbelmet", "xactv", "xslow", "xpass",
"xwood1", "xwood2", "xwood3",
"rwcf_initial1", "rwcf_initial2",
"rwcf_initial3", "rwcf_initial4",
"rwcf_initial5", "rwcf_initial6",

```

```

"rwcf_initial7", "rwcf_initial8",
"rwcf_initial9", "rwcf_initial10",
"asmos1", "asmos2", "asmos3", "asmos4",
"asmos5", "asmos6", "asmos7", "asmos8",
"asmos9", "asmos10", "asmos11", "snql",
"snow", "srfstrlig", "belstrlig")
init.values <-c(240, 60, 60, 186.5, 113.4, 130, 2570,
               1596, 500, 500, 500, 0.5, 0.5, 0.5, 0.5,
               0.5, 0.5, 0.5, 0.5, 0.5, 0.5, 0.2,
               0.2, 0.2, 0.2, 0.2, 0.2, 0.2, 0.2,
               0.2, 0.2, 0.2, 0, 0, 0.275, 0.354)
init <- data.frame(V1=init.values, V2=init.names)
#site (site.100)
site.parameters.names <-c("sitlat", "sitlog",
                          "sand", "silt", "clay", "bd",
                          "nlayer", "nlaypg", "drain",
                          "basef", "stormf",
                          "SWFLAGflag_fc_wtpt (0useactual, 1.0Guputa)",
                          "AWILT1", "AWILT2", "AWILT3",
                          "AWILT4", "AWILT5", "AWILT6",
                          "AWILT7", "AWILT8", "AWILT9",
                          "AWILT10",
                          "AFIEL1", "AFIEL2", "AFIEL3",
                          "AFIEL4", "AFIEL5", "AFIEL6",
                          "AFIEL7", "AFIEL8", "AFIEL9",
                          "AFIEL10", "elev", "xNmineral")
#site sand, silt, clay, bulk density
site.parameters.values <-c(59.36, 13.47, 0.55, 0.15, 0, 1.226,
                          8, 5, 1, 0.5, 0.9, 1, 0.2, 0.2, 0.2, 0.2,
                          0.2, 0.2, 0.2, 0.2, 0.2, 0.2, 0.3, 0.3,
                          0.3, 0.3, 0.3, 0.3, 0.3, 0.3, 0.3, 0.3,
                          50, 1.65)
site.parameters <- data.frame(V1=site.parameters.values,
                             V2=site.parameters.names)
#climate environment (site.100)
envi.parameters.names <-c("Prec (1) cm", "Prec (2) cm",
                          "Prec (3) cm", "Prec (4) cm", "Prec (5) cm",

```



```

"Prec (6) cm", "Prec (7) cm",
"Prec (8) cm", "Prec (9) cm", "Prec (10) cm",
"Prec (11) cm", "Prec (12) cm",
"Tmin (1) degree", "Tmin (2) degree",
"Tmin (3) degree", "Tmin (4) degree",
"Tmin (5) degree", "Tmin (6) degree",
"Tmin (7) degree", "Tmin (8) degree",
"Tmin (9) degree", "Tmin (10) degree",
"Tmin (11) degree", "Tmin (12) degree",
"Tmax (1) degree", "Tmax (2) degree",
"Tmax (3) degree", "Tmax (4) degree",
"Tmax (5) degree", "Tmax (6) degree",
"Tmax (7) degree", "Tmax (8) degree",
"Tmax (9) degree", "Tmax (10) degree",
"Tmax (11) degree", "Tmax (12) degree")
envi.parameters.values <-c(3.395,2.695,2.884,3.051,3.306,
4.471,4.623,6.016,5.494,5.221,
5.659,3.858,-6.647,-7.235,-4.201,
-0.121,4.97,9.538,11.74,11.038,7.266,
3.379,-1.027,-5.32,-0.782,-0.375,3.613,
9.369,15.549,19.758,21.351,20.219,
15.489,9.915,4.286,0.584)
envi.parameters <- data.frame(V1=envi.parameters.values,
V2=envi.parameters.names)
#tree
tree.parameters.names <-c("cerfor(1:2:3,1,1),cnr_fol",
"cerfor(1:2:3,3,1),cnr_bra",
"cerfor(1:2:3,4,1),cnr_ste",
"cerfor(1:2:3,2,1),cnr_fir",
"cerfor(1:2:3,5,1),cnr_cor",
"DECW1,kwood1_0,bra","DECW2,
kwood2_0,ste","DECW3,kwood3_0,cor",
"forrtf","leafdr1", "leafdr2",
"leafdr3","leafdr4", "leafdr5",
"leafdr6","leafdr7", "leafdr8",
"leafdr9","leafdr10", "leafdr11",
"leafdr12",

```

```

        "wdlig1,cfol_lig", "wdlig3,cbra_lig",
        "wdlig4,cste_lig", "wdlig2,cfir_lig",
        "wdlig5,ccor_lig",
        "wooddr1fol", "wooddr3bra",
        "wooddr4ste", "wooddr2fir", "wooddr5cor")
tree.parameters.values <-c(20,99,140,40,83,1.5,0.5,0.6,
        0.5,0,0,0,0.002,0.006,0.012,
        0.013,0.039,0.175,0.664,0.066,
        0.023,0.223,0.25,0.25,0.25,0.25,
        1,0.01,0.002,0.04,0.004)
tree.parameters <- data.frame(V1=tree.parameters.values,
        V2=tree.parameters.names)

# biomass components gC.m-2
biomass.in <- data.frame(id=1,
        foliage.tot70=795.954,
        branch.tot70=1241.235,
        wood.tot70=5110.385,
        fineroot.tot70=251.318,
        root.tot70=1652.101)

# litter components gC.m-2
litter.in <- data.frame(id=1,
        foliage.lit.tot70=116.804,
        branch.lit.tot70=15.515,
        wood.lit.tot70=12.447,
        fineroot.lit.tot70=131.778,
        root.lit.tot70=20.651)

# Define objects from SITE SPECIFIC PARAMETERS: #####
# environment(meteo), site, and tree parameters #####
#site specific parameters
envi <- envi.parameters
tree <- tree.parameters
site <- site.parameters
## define environment #####
# prec: monthly precipitation, cm
# atempmin: monthly minimum air temperature
# atempmax: monthly maximum air temperature
prec<-matrix(0,nrow=12,ncol=1)

```

```

atempmin<-matrix(0,nrow=12,ncol=1)
atempmax<-matrix(0,nrow=12,ncol=1)
for(m in 1:12)
{
  prec[m]<-envi[m,1]
  atempmin[m]<-envi[m+12,1]
  atempmax[m]<-envi[m+24,1]
}
## define site parameters #####
# awilt: wilting point
# afield: field capacity
sitlat<-site[1,1]
sitlog<-site[2,1]
sand<-site[3,1]
silt<-site[4,1]
clay<-site[5,1]
bd<-site[6,1]
#use mean soil parameters for swedish soils
#(if soil data is not available)
if (is.na(bd)){
  bd<-1.2
}
if(sum(sand,silt,clay)==0){
  silt<-0.45
  clay<-0.179
  bd<-0.029
}
nlayer<-as.integer(site[7,1])
nlaypg<-as.integer(site[8,1])
drain<-site[9,1]
basef<-site[10,1]
stormf<-site[11,1]
flag_fc_wtpt<-as.integer(site[12,1])
awilt<-matrix(0,nrow=10,ncol=1)
afield<-matrix(0,nrow=10,ncol=1)
for(i in 1:10)
{

```

```

awilt[i]<-site[12+i,1]
afiel[i]<-site[22+i,1]
}
elev<-site[33,1]
xNmineral<-site[34,1]
## define init parameters #####
# xsrfstr: surface structural
# xsrfmet: surface metabolic
# xsrfmic: surface microbe
# xbelstr: belowground structural
# xbelmet: belowground metabolic
# xactv: actic pool
# xslow: slow pool
# xpass: passive pool
# xwood1: branch litter
# xwood2: stem litter
# xwood3: coarse root litter
# rwcfc: volumetric soil water content
# asmos: soil water content of the ith soil layer cmh2o
xsrfstr<-init[1,1]
xsrfmet<-init[2,1]
xsrfmic<-init[3,1]
xbelstr<-init[4,1]
xbelmet<-init[5,1]
xactv<-init[6,1]
xslow<-init[7,1]
xpass<-init[8,1]
xwood1<-init[9,1]
xwood2<-init[10,1]
xwood3<-init[11,1]
tawood <- xwood1 + xwood2
tbwood <- xwood3
talit <- xsrfstr + xsrfmet + xsrfmic
tblit <- xbelstr + xbelmet
somscl <- xactv + xslow + xpass
somsct <- xactv + xslow + xpass + xbelstr + xbelmet
rwcfc<-matrix(0.1,nrow=10,ncol=1)

```

```

for(j in 1:nlayer)
{
  rwcfc[j]<-init[11+j,1]
}
asmos<-matrix(0.1,nrow=11,ncol=1)
for(j in 1:(nlayer+1))
{
  asmos[j]<-init[21+j,1]
}
snlq<-init[33,1]
snow<-init[34,1]
srfstrlig<-init[35,1]
belstrlig<-init[36,1]
##
## define tree parameters #####
# CN ratio of foliage, branch stem, fine roots, coarse roots
# Decomposition constant
# Translocation of N
# Lignin ratios
# Death rate
cnr_fol<-tree[1,1]
cnr_bra<-tree[2,1]
cnr_ste<-tree[3,1]
cnr_fir<-tree[4,1]
cnr_cor<-tree[5,1]
kwood1<-tree[6,1]
kwood2<-tree[7,1]
kwood3<-tree[8,1]
forrtf<-tree[9,1]
leafdr<-matrix(0,nrow=12,ncol=1)
for(j in 1:12)
{
  leafdr[j]<-tree[j+9,1]
}
cfol_lig<-tree[22,1]
cbra_lig<-tree[23,1]
cste_lig<-tree[24,1]

```

```

cfir_lig<-tree[25,1]
ccor_lig<-tree[26,1]
wooddr<-matrix(0,nrow=5,ncol=1)
for(j in 1:5)
{
  wooddr[j]<-tree[j+26,1]
}
## define main (FIX) parameters #####
# A: decomposition constant
# k: decomposition constant
adep<-matrix(0.1,nrow=10,ncol=1)
for(j in 1:10)
{
  adep[j]<-parameters[j,1]
}
#
#
awt1<-matrix(0,nrow=10,ncol=1)
for(j in 1:10)
{
  awt1[j]<-parameters[10+j,1]
}
damr11<-parameters[21,1]
damr21<-parameters[22,1]
damrmn<-parameters[23,1]
Asrfstr<-parameters[24,1]
Asrfmet<-parameters[25,1]
Abelstr<-parameters[26,1]
Abelmet<-parameters[27,1]
Asrfmic<-parameters[28,1]
kactv<-parameters[29,1]
kslow<-parameters[30,1]
kpass<-parameters[31,1]
Edepth<-parameters[32,1]
elitst<-parameters[33,1]
fwloss1<-parameters[34,1]
fwloss2<-parameters[35,1]

```

```
fwloss3<-parameters[36,1]
fwloss4<-parameters[37,1]
CYCL<-as.integer(parameters[38,1])
omlech<-matrix(0,nrow=3,ncol=1)
omlech[1]<-parameters[39,1]
omlech[2]<-parameters[40,1]
omlech[3]<-parameters[41,1]
P1CO2A1<-parameters[42,1]
P1CO2A2<-parameters[43,1]
P1CO2B1<-parameters[44,1]
P1CO2B2<-parameters[45,1]
Psrfmic<-P1CO2A1
Pactv<-P1CO2A2+P1CO2B2*sand
Pslow<-parameters[46,1]
Ppass<-parameters[47,1]
pabres<-parameters[48,1]
Peftxa<-parameters[49,1]
Peftxb<-parameters[50,1]
pligst1<-parameters[51,1]
pligst2<-parameters[52,1]
Psrfstr<-parameters[53,1]
Psrfmet<-parameters[54,1]
Pbelstr<-Psrfstr
Pbelmet<-Psrfmet
PmnTmp<-parameters[55,1]
PmxBio<-parameters[56,1]
PmxTmp<-parameters[57,1]
PS1CO21<-parameters[58,1]
PS1CO22<-parameters[59,1]
ps1s31<-parameters[60,1]
ps1s32<-parameters[61,1]
ps2s31<-parameters[62,1]
ps2s32<-parameters[63,1]
RSPLIG<-parameters[64,1]
spl1<-parameters[65,1]
spl2<-parameters[66,1]
strmax1<-parameters[67,1]
```

```

strmax2<-parameters[68,1]
teff1<-parameters[69,1]
teff2<-parameters[70,1]
teff3<-parameters[71,1]
Tmelt1<-parameters[72,1]
Tmelt2<-parameters[73,1]
#Biomass data from Swe Forest and Soil Inventory #####
#biomass components gC.m-2
#biomass.in
pools.bfol<- biomass.in[1,2]
pools.bbba<-biomass.in[1,3]
pools.bste<-biomass.in[1,4]
pools.bfir<-biomass.in[1,5]
pools.bcor<-biomass.in[1,6]
#Litterfall SITE SPECIFIC data
litter.in <- litter.in
# Initialization #####
stempave<-0.0
defac<-0.0
pet<-0.0
anerb<-0.0
CO2out<-0.0
leaching<-0.0
pet<-matrix(0,nrow=12,ncol=1)
avh2o<-matrix(0.0,nrow=3,ncol=1)
amov<-matrix(0.0,nrow=11,ncol=1)
tran<-0.0
evap<-0.0
streaml<-0.0
cleach<-0.0
tcleach<-0.0
#####
#
## Functions of the CENTURY #####
#
#####
## function (calpet ) #####

```



```

## potential evapotranspiration
calpet<-function()
{
  # Linacre(1977) from CENTURY source
  #As in the CENTURY
  elev<-0.0
  ave<-matrix(0,nrow=12,ncol=1)
  ave[1]<-(atempmax[1]+atempmin[1])/2.0
  highest<-ave[1]
  lowest<-ave[1]
  for(k in 2:12)
  {
    ave[k]<-(atempmax[k]+atempmin[k])/2.0
    if(ave[k]>highest)
    {
      highest<-ave[k]
    }
    if(ave[k]<lowest)
    {
      lowest<-ave[k]
    }
  }
  if(lowest< (-10.0))
  {
    lowest<- (-10.0)
  }
  ra<-abs(highest-lowest)
  for(k in 1:12)
  {
    if(atempmin[k]<(-10.0))
    {
      tr<-atempmax[k]-(-10.0)
    }
    else
    {
      tr<-atempmax[k]-atempmin[k]
    }
  }
}

```

```

t<-tr/2.0+atempmin[k]
tm<-t+0.006*elev
td<-0.0023*elev+0.37*t+0.53*tr+0.35*ra-10.9
e<-((700.0*tm/(100.0-abs(sitlat)))+15.0*td)/(80.0-t)
monpet<-(e*30.0)/10.0
if(monpet < 0.5)
{
  pet[k]<<-0.5*fwloss4
}
else
{
  pet[k]<<-monpet*fwloss4
}
}
}
## function (calstemp) #####
## soil temperature
calstemp<-function(month)
{
  #For Forest only (e.g. no savana)
  stdead<-0.0
  bio<-(pools.bfol)*2.5+stdead+(xsrfstr+xsrfmet)*2.0*elitst
  if(bio>PmxBio)
  {
    bio<-PmxBio
  }
else {
  bio<-bio
}
  stempmax <<-atempmax[month]+
    (25.4/(1+18.0*exp(-0.20*atempmax[month]))) *
    (exp(PmxTmp*bio)-0.13)
  stempmin <<-atempmin[month]+PmnTmp*(bio)-1.78
  stempave <<-(stempmax+stempmin)/2.0
}
## function (calfc_wtpt) #####
## field capacity and wilting point

```

```

calfc_wtpt<-function()
{
  #From CENTURY source
  #swflag lets the model user choose between using actual data
  #for awilt and afiel or equations from Gupta and Larson (1979)
  #or Rawls et al (1982).
  #swflag=0
  #Use actual data
  #swflag=1
  #Use G&L for both awilt (-15 bar) and afiel (-0.33 bar)
  #swflag=2
  #Use G&L for both awilt (-15 bar) and afiel (-0.10 bar)
  #swflag=3
  #Use Rawls for both awilt (-15 bar) and afiel (-0.33 bar)
  #swflag=4
  #Use Rawls for both awilt (-15 bar) and afiel (-0.10 bar)
  #swflag=5
  #Use Rawls for afiel (-0.33 bar) and actual data for awilt
  #swflag=6
  #Use Rawls for afiel (-0.10 bar) and actual data for awilt
  fcsc<-c( 0.3075,    0.5018,    -0.20,    -0.30,    -0.19,    0.31)
  fcsl<-c( 0.5886,    0.8548,    0.0,      0.0,      0.0,      0.0)
  fccl<-c( 0.8039,    0.8833,    0.36,    0.23,    0.0,      0.0)
  fcom<-c( 2.208E-03, 4.966E-03, 0.0299, 0.0317, 0.0210, 0.0260)
  fcbd<-c(-0.1434,   -0.2423,   0.0,      0.0,      0.0,      0.0)
  fcwp<-c( 0.0,      0.0,      0.0,      0.0,      0.72,    0.41)
  fcin<-c( 0.0,      0.0,      0.2576,   0.4118,   0.2391,   0.4103)
  wpsa<-c(-0.0059,   -0.0059,   0.0,      0.0,      0.0,      0.0)
  wpsi<-c( 0.1142,   0.1142,   0.0,      0.0,      0.0,      0.0)
  wpcl<-c( 0.5766,   0.5766,   0.50,     0.50,     0.0,      0.0)
  wpom<-c( 2.228E-03, 2.228E-03, 0.0158,   0.0158,   0.0,      0.0)
  wpbd<-c( 0.02671,  0.02671,  0.0,      0.0,      0.0,      0.0)
  wpwp<-c( 0.0,      0.0,      0.0,      0.0,      1.0,     1.0)
  wpin<-c( 0.0,      0.0,      0.0260,   0.0260,   0.0,      0.0)
  #print(somsc)
  ompc <- somsc*1.724/(10000*bd*Edepth)
  swflag<-flag_fc_wtpt
}

```

```

for(lyr in 1:nlayer)
{
  #Please note:
  #In the original CENTURY model,
  #somsc was not calculated before the call of the prelim.f,
  #so afiel is calculated using somsc=ompc=0.
  #This is a bug of the original CENTURY model
  if(BFix==0)
  {
    ompc<-0.0
  }
  afiel[lyr] <<- fcsa[swflag]*sand + fcsi[swflag]*silt +
                fccl[swflag]*clay + fcom[swflag]*ompc +
                fcdb[swflag]*bd + fcwp[swflag]*awilt[lyr] +
                fcin[swflag]
  awilt[lyr] <<- wpsa[swflag]*sand + wpsi[swflag]*silt+
                wpcl[swflag]*clay + wpom[swflag]*ompc +
                wpbd[swflag]*bd + wpwp[swflag]*awilt[lyr] +
                wpin[swflag]
  ompc<-ompc*0.85
}
}
## function (calwater) #####
## soil water content
calwater<-function(month)
{
  #Initialize
  add<-0.0
  amelt<-0.0
  asimx<-0.0
  avh2o[1]<<-0.0
  avh2o[2]<<-0.0
  avh2o[3]<<-0.0
  avap<-0.0
  evl<-0
  pevp<-0.0
  pttr<-0.0

```

```

rwc1<-0.0
tran<<-0.0
trap<-0.01
aabs<-0.0
evsnow<-0.0
evap<<-0.0
petrem<-pet[month]
awwt<-matrix(0.0,nrow=11,ncol=1)
#CO2 effect was not included here
co2val<-1.0
irract<-0.0
inputs<-prec[month]+irract
winputs<-inputs
atempave<<-(atempmax[month]+atempmin[month])/2.0
aliv<-pools.bfol*2.5
aliv<-prec[month]*2.5
adead<-0.0
#*****
#Snow
#Snowfall
if(atempave <= 0.0)
{
  #snow <- snow + prec[month]
  snow <<- snow + inputs
  winputs<-0.0
}
# melt
if(atempave >= Tmelt1)
{
  melt <- Tmelt2 *(atempave -Tmelt1)
  if(melt>snow)
  {
    melt<-snow
  }
  snow <<-snow-melt
  ##.....
  if((atempave > 0.0) && (snow > 0.0))

```

```

{
  snlq<<-snlq+inputs
}
snlq<<-snlq+melt
if(snlq >= (0.05*snow))
{
  add<-snlq -0.05*snow
  snlq<<-snlq-add
}
}
if(snow > (0.0))
{
  evsnow<-petrem*0.87
  snow1<-snow+snlq
  if(evsnow > snow1)
  {
    evsnow<-snow1
  }
  snow<<-snow-evsnow*(snow/snow1)
  snlq<<-snlq-evsnow*(snlq/snow1)
  evap<<-evap+evsnow
  petrem<-petrem-evsnow/0.87
  if(petrem < 0.0)
  {
    petrem<-0.0
  }
}
if(snow <= 0.0)
{
  sd<-aliv+adead
  if(sd > 800.0)
  {
    sd<-800.0
  }
  if(alit > 400.0)
  {
    alit<-400.0
  }
}

```

```

}
aint<-(0.0003 * alit +0.0006 *sd) *fwloss1
aabs<-0.5*exp((-0.002*alit)-(0.004*sd))*fwloss2
if((aabs+aint)*inputs<0.4*petrem)
{
  evl<-(aabs+aint)*winputs
}
else
{
  evl<-0.4*petrem
}
evap<<-evap+evl
add<-add+winputs -evl
trap<-petrem-evl
}
if(atempave < 2.0)
{
  pttr<-0.0
}
else
{
  pttr<-petrem *0.65 *(1.0 -exp(-0.020 *aliv)) *co2val
}
if(pttr <= trap){trap<-pttr}
if(trap <= 0.0){trap<-0.01}
##.....
#hpttr is not included
pevp<-petrem -trap -evl
if(evap<0.0){pevp<-0.0}
if((trap-0.01) < add)
{
  #print(add)
  tran<<- trap-0.01
}
else
{
  tran<<- add
}

```

```

}
trap<-trap-tran
add<-add-tran
strm<-0.0
base<-0.0
stream1<<-0.0
for(j in 1:nlayer)
{
  asmos[j]<<-asmos[j]+add
  afl<-adep[j]*afiel[j]
  if(asmos[j]>afl)
  {
    amov[j]<<-asmos[j]-afl
    asmos[j]<<-afl
    if(j == nlayer)
    {
      strm<-amov[j]*stormf
    }
  }
  else
  {
    amov[j]<<-0.0
  }
  add<-amov[j]
}
asmos[nlayer+1]<<-asmos[nlayer+1]+add-strm
base<-asmos[nlayer+1]*basef
asmos[nlayer+1]<<-asmos[nlayer+1]-base
stream1<<-strm+base
asimx<-asmos[1]
rwcl<-0.0
tot<-0.0
tot2<-0.0
for(j in 1:nlayer)
{
  avw<-asmos[j]-awilt[j]*adep[j]
  if(avw < 0.0)

```



```

{
  avw<-0.0
}
awwt[j]<-avw*awt1[j]
tot<-tot+avw
tot2<-tot2+awwt[j]
}
if(tot<trap)
{
  trap<-tot
}
else
{
  trap<-trap
}
if(tot2 > 0.0)
{
  for(j in 1:nlayer)
  {
    avinj<-asmos[j]-awilt[j]*adep[j]
    if(avinj < 0.0)
    {
      avinj<-0.0
    }
    trl<-(trap*awwt[j])/tot2
    if(trl > avinj)
    {
      trl<-avinj
    }
    asmos[j]<<-asmos[j]-trl
    #if(year==5 && month==1){cat(asmos[j], trl,"\n")}
    avinj<-avinj-trl
    tran<<-tran+trl
    rwcf[j]<-(asmos[j]/adep[j]-awilt[j])/(afiel[j]-awilt[j])
    if(j<=nlaypg)
    {
      avh2o[1]<<-avh2o[1]+avinj
    }
  }
}

```

```

    }
    avh2o[2]<<-avh2o[2]+avinj
    if(j <= (2))
    {
        avh2o[3]<<-avh2o[3]+avinj
    }
}
}
fwlos<-0.25
evmt<-(rwc[1]-fwlos)/(1.0-fwlos)
if(evmt <= (0.01))
{
    evmt<-0.01
}
evlos<-evmt*pevp*aabs*0.10
avinj<-asmos[1]-awilt[1]*adep[1]
if(avinj < 0.0)
{
    avinj<-0.0
}
if(evlos > avinj)
{
    evlos<-avinj
}
asmos[1]<<-asmos[1]-evlos
evap<<-evap+evlos
avhsm<-(asmos[1]+rwc1*asimx)/(1.0+rwc1)
rwc[1]<<-(avhsm/adep[1]-awilt[1])/(afiel[1]-awilt[1])
avh2o[1]<<-avh2o[1]-evlos
avh2o[2]<<-avh2o[2]-evlos
avh2o[3]<<-avh2o[3]-evlos
}
## function (caldefac) #####
## decomposition factor
caldefac<-function()
{
    if(snow > 0.0)

```

```

{
  stempave<-0.0
}
# Cal defac
tfunc<-teff1+teff2*exp(teff3 * stempave)
rprpet <<- (avh2o[3] + prec[month] ) / pet[month]
#* ideo in fix.100 in Century control linear 1 or ratio 2 option
#* this is ideo==2
if(rprpet > 9.0 )
{
  wfunc<<-1.0
}
else
{
  wfunc<<-1.0/(1.0+30.0*exp(-8.5*rprpet))
}
#if(wfunc>1.0)
#{
#  wfunc<<-1.0
#}
defac<<-tfunc*wfunc
##
# If you want to use the defac from the original CENTURY, then.
# defac<<-centdefac[1+(year-1)*12+month,2]
#*** Cal anerb
anerb <<- 1.0
}
## functions to Divide litter inputs#####
##
## function (calcenturyinput) #####
## litter inputs into each soil carbon pool:1
calcenturyinput<-function()
{
  if(flows.lfinfol>0.0)
  {
    #centurypartit(1, cnr_srflit)
    centurypartit(1, cnr_fol)
  }
}

```

```

}
else
{
  usrfstr <<-0.0
  usrfmet <<-0.0
  usrfstr_lig <<- 0.0
}
if(flows.lfinfir>0.0)
{
  #centurypartit(2, cnr_bellit)
  centurypartit(2, cnr_fir)
}
else
{
  ubelstr <<- 0.0
  ubelmet <<- 0.0
  ubelstr_lig <<- 0.0
}
uwood1 <<- flows.lfinbra
uwood2 <<- flows.lfinste
uwood3 <<- flows.lfincor
uwood1_lig <<- flows.lfinbra * cbra_lig
uwood2_lig <<- flows.lfinste * cste_lig
uwood3_lig <<- flows.lfincor * ccor_lig
}
## function (centurypartit) #####
## litter inputs into each soil carbon pool:2
centurypartit<-function(p, cnr)
{
  #translocation
  #forrtf
  if(p==1)
  {
    cpart<- flows.lfinfol
    epart<- flows.lfinfol*(1.0/cnr)*(1.0-forrtf)
    #amax1
    if(cpart/pabres > 1.0)

```

```

{
  s<-cpart/pabres
}
else
{
  s<-1.0
}
#damr11<-0.0
dirabs<- damr11 * xNmineral * s
if((epart+dirabs) <= 0.0)
{
  rcetot<-0.0
}
else
{
  rcetot<-cpart/(epart+dirabs)
}
if(rcetot < damrmn)
{
  dirabs<-cpart/damrmn-epart
}
if(dirabs<0.0)
{
  dirabs<-0.0
}
frlign<- cfol_lig
}
else if (p==2)
{
  cpart<- flows.lfinfir
  #epart<- flows.lfinfir*(1.0/cnr)*(1.0-forrtf)
  epart<- flows.lfinfir*(1.0/cnr)
  #amax1
  if(cpart/pabres > 1.0)
  {
    s<-cpart/pabres
  }
}

```

```

else
{
  s<-1.0
}
dirabs<- damr21 * xNmineral * s
if((epart+dirabs) <= 0.0)
{
  rcetot<-0.0
}
else
{
  rcetot<-cpart/(epart+dirabs)
}
if(rcetot < damrmn)
{
  dirabs<-cpart/damrmn-epart
}
if(dirabs<0.0)
{
  dirabs<-0.0
}
frlign<- cfir_lig
}
else
{
  printf("error")
}
###
frn<- (epart + dirabs)/(cpart*2.5)
rlnres<-frlign/frn
frmet<- spl1 -spl2 *rlnres
if(frmet > (1.0-frmet))
{
  frmet<- 1.0-frmet
}
if(frmet<0.20)
{

```

```

    frmet<-0.20
  }
  caddm <- cpart*frmet
  if(caddm < 0.0)
  {
    caddm<-0.0
  }
  cadds <- cpart-caddm
  fligst <- frlign/(cadds/cpart)
  if(fligst > 1.0)
  {
    fligst <- 1.0
  }
  if(p==1)
  {
    usrfstr <<- flows.lfinfol *(1.0-frmet)
    usrfmet <<- flows.lfinfol *frmet
    usrfstr_lig <<- fligst
  }
  else if (p==2)
  {
    ubelstr <<- flows.lfinfir *(1.0-frmet)
    ubelmet <<- flows.lfinfir *frmet
    ubelstr_lig <<- fligst
  }
}
#####
## functions (calcentury)
## to calculate soil carbon dynamics
## *****
calcentury<-function()
{
  uwood1<-flows.lfinbra
  uwood2<-flows.lfinste
  uwood3<-flows.lfincor
  #*****
  # ** Dead branch = Wood 1

```

```

#strlig=(xwood1*wood1strlig+uwood1_lig)/(xwood1+uwood1)
#wood1strlig= strlig
strlig <-cbra_lig
if(xwood1>0.000001)
{
  tcflow <- xwood1*defac*kwood1*exp(-pligst1*strlig)*DT
  if(tcflow>xwood1)
  {
    tcflow<-xwood1
  }
}
else
{
  tcflow<-0.0
}
tsom2_fwood1 <- tcflow * strlig
#*Respiration associated with decomposition to som2
co2los <- tsom2_fwood1 * RSPLIG
CO2out <<- CO2out+co2los
#*Net C flow to SOM2
tsom2_fwood1 <- tsom2_fwood1 - co2los
tsom1_fwood1 <- tcflow - tsom2_fwood1 - co2los
#*Respiration associated with decomposition to som1
co2los <- tsom1_fwood1 * PS1CO21
tsom1_fwood1 <- tsom1_fwood1 -co2los
CO2out<<-CO2out+co2los
#*****
xwood1_new <- xwood1 + uwood1 - tcflow
#*****
# ** Dead Stem = Wood 2
#strlig=(xwood2*wood2strlig+uwood2_lig)/(xwood2+uwood2)
#wood2strlig= strlig
strlig<-cste_lig
if(xwood2>0.000001)
{
  tcflow<- xwood2*defac*kwood2*exp(-pligst1*strlig)*DT
  if(tcflow>xwood2)

```



```

    {
      tcflow<-xwood2
    }
  }
else
{
  tcflow<-0.0
}
tsom2_fwood2 <- tcflow * strlig
#*Respiration associated with decomposition to som2
co2los <- tsom2_fwood2 * RSPLIG
CO2out<<-CO2out+co2los
#*Net C flow to SOM2
tsom2_fwood2 <- tsom2_fwood2 - co2los
tsom1_fwood2 <- tcflow - tsom2_fwood2 - co2los
#*Respiration associated with decomposition to som1
co2los <- tsom1_fwood2 * PS1CO21
tsom1_fwood2 <- tsom1_fwood2 -co2los
CO2out<<-CO2out+co2los
#*****
xwood2_new <- xwood2 + uwood2 - tcflow
#*****
# ** Dead Coarse root = Wood 3
#strlig=(xwood3*wood3strlig+uwood3_lig)/(xwood3+uwood3)
#wood3strlig= strlig
strlig<-ccor_lig
if(xwood3>0.000001)
{
  tcflow<- xwood3*defac*kwood3*exp(-pligst2*strlig)*anerb*DT
  if(tcflow>xwood3)
  {
    tcflow<-xwood3
  }
}
else
{
  tcflow<-0.0
}

```

```

}
tsom2_fwood3 <- tcflow * strlig
#*Respiration associated with decomposition to som2
co2los <- tsom2_fwood3 * RSPLIG
CO2out<<-CO2out+co2los
#*Net C flow to SOM2
tsom2_fwood3 <- tsom2_fwood3 - co2los
tsom1_fwood3 <- tcflow - tsom2_fwood3 - co2los
#*Respiration associated with decomposition to som1
co2los <- tsom1_fwood3 * PS1CO21
tsom1_fwood3 <- tsom1_fwood3 -co2los
CO2out<<-CO2out+co2los
#*****
xwood3_new <- xwood3 + uwood3 - tcflow
#*****
# ** surface structural
#strlig=(pools.xlig1_fol + pools.xlig1_bra +
#       pools.xlig1_ste)/(pools.talit)
#srfstrlig = xsrfstr*srfstrlig/xsrfstr
#strlig=(xsrfstr*srfstrlig + usrfstr_lig)/(xsrfstr+usrfstr)
strlig<-(xsrfstr*srfstrlig + usrfstr_lig*usrfstr)/
        (xsrfstr + usrfstr)
srfstrlig <<- strlig
if(xsrfstr>0.000001)
{
  if(xsrfstr>strmax1)
  {
    mass<-strmax1
  }
  else
  {
    mass<-xsrfstr
  }
  tcflow <-mass*defac*Asrfstr*exp(-pligst1*strlig)*DT
  if(tcflow>xsrfstr)
  {
    tcflow<-xsrfstr
  }
}

```

```

    }
}
else
{
  tcflow<-0.0
}
tsom2_fsrfstr <- tcflow * strlig
#*Respiration associated with decomposition to som2
co2los <- tsom2_fsrfstr * RSPLIG
CO2out <<- CO2out+co2los
#*Net C flow to SOM2
tsom2_fsrfstr <- tsom2_fsrfstr - co2los
tsom1_fsrfstr <- tcflow - tsom2_fsrfstr - co2los
#*Respiration associated with decomposition to som1
co2los <- tsom1_fsrfstr * PS1CO21
tsom1_fsrfstr <- tsom1_fsrfstr -co2los
CO2out <<- CO2out+co2los
#*****
xsrfsr_new <- xsrfsr + usrfsr - tcflow
#*****
# ** soil structural
#strlig=(pools.xlig1_fir+pools.xlig1_cor)/(pools.tblit)
#belstrlig = xbelstr*belstrlig/xbelstr
strlig<-(xbelstr*belstrlig + ubelstr_lig*ubelstr)/
      (xbelstr + ubelstr)
belstrlig<<-strlig
if(xbelstr>0.000001)
{
  if(xbelstr>strmax2)
  {
    mass<-strmax2
  }
  else
  {
    mass<-xbelstr
  }
  tcflow<-mass*defac*Abelstr*exp(-pligst2*strlig)*anerb*DT

```

```

    if(tcflow>xbelstr)
    {
        tcflow<-xbelstr
    }
}
else
{
    tcflow<-0.0
}
tsom2_fbelstr <- tcflow * strlig
#*Respiration associated with decomposition to som2
co2los <- tsom2_fbelstr * RSPLIG
CO2out <<- CO2out+co2los
#*Net C flow to SOM2
tsom2_fbelstr <- tsom2_fbelstr - co2los
tsom1_fbelstr <- tcflow - tsom2_fbelstr - co2los
#*Respiration associated with decomposition to som1
co2los <- tsom1_fbelstr * PS1CO22
tsom1_fbelstr <- tsom1_fbelstr -co2los
CO2out<<-CO2out+co2los
#*****
xbelstr_new <- xbelstr + ubelstr - tcflow
#*****
# ** surface metab
if(xsrmet>0.000001)
{
    tcflow<-xsrmet * defac * Asrmet * DT
    if(tcflow>xsrmet)
    {
        tcflow<-xsrmet
    }
}
else
{
    tcflow<-0.0
}
co2los<-tcflow*Psrmet

```

```

tsom1_fsrfmet <- tcflow-co2los
CO2out <<- CO2out+co2los
xsrfmet_new <- xsrfmet +usrfmet -tcflow
#*****
# ** belowground metab
if(xbelmet>0.000001)
{
  tcflow<-xbelmet * defac * Abelmet* anerb * DT
  if(tcflow>xbelmet)
  {
    tcflow<-xbelmet
  }
}
else
{
  tcflow<-0.0
}
co2los<-tcflow*Pbelmet
tsom1_fbelmet<-tcflow-co2los
CO2out<<-CO2out+co2los
xbelmet_new<-xbelmet + ubelmet -tcflow
#*****
#**** surface microbe
if(xsrfmic>0.000001)
{
  tcflow <- xsrfmic * defac * Asrfmic *DT
  if(tcflow>xsrfmic)
  {
    tcflow <- xsrfmic
  }
}
else
{
  tcflow<-0.0
}
co2los<-tcflow*Psrfmic
tsom2_fsrfmic<-tcflow-co2los

```

```

CO2out<<-CO2out+co2los
xsrfmic_new <- xsrfmic + tsom1_fsrfstr + tsom1_fsrfmet +
                tsom1_fwood1 + tsom1_fwood2 -tcflow
#xsrfmic_new= -tcflow + xsrfmic + tsom1_fsrfstr+tsom1_fsrfmet
#xsrfmic_new= -tcflow + xsrfmic + tsom1_fsrfmet
#*****
#**** active
eftext <- Peftxa + Peftxb * sand
if(xactv>0.000001)
{
  tcflow<-xactv* defac * eftext * kactv * anerb *DT
  if(tcflow>xactv)
  {
    tcflow<-xactv
  }
}
else
{
  tcflow<-0.0
}
co2los<-tcflow*Pactv
#*cfsfs2=tcflow-co2los
#*tcflow=tcflow-co2los
CO2out<<-CO2out+co2los
fpsls3 <- psls31 + psls32 * clay
tsom3_factv<-tcflow * fpsls3
#leaching
if(amov[2]>0.0)
{
  orglch<-omlech[1]+omlech[2]*sand
  t<-1.0-(omlech[3]-amov[2])/omlech[3]
  if(t>1.0)
  {
    linten<-1.0
  }
}
else
{

```

```

    linten<-t
  }
  cleach<<-tcflow * orglch * linten
}
else
{
  cleach<<-0.0
}
tcleach<<-tcleach+cleach
tsom2_factv<-tcflow -co2los -tsom3_factv -cleach
#* Updated at the end.
#xactv_new = xactv + tsom1_fbelstr +tsom1_fbelmet +
#           tsom1_fwood3 +tsom1_fslow +tsom1_fpass -tcflow
xactv_new <- xactv + tsom1_fbelstr +tsom1_fbelmet +
            tsom1_fwood3 -tcflow
#*****
#**** Slow
if(xslow>0.000001)
{
  tcflow<-xslow *defac * kslow * anerb *DT
  if(tcflow>xslow)
  {
    tcflow<-xslow
  }
}
else
{
  tcflow<-0.0
}
co2los<-tcflow*Pslow
#*cfsfs2=tcflow-co2los
#*tsom3_fslow=tcflow-co2los
CO2out<<-CO2out+co2los
xslow_new <- xslow + tsom2_fsrfstr +tsom2_fsrfmic +
            tsom2_fbelstr +tsom2_factv + tsom2_fwood1 +
            tsom2_fwood2 + tsom2_fwood3 -tcflow
fps2s3 <- ps2s31 + ps2s32 * clay

```

```

tsom3_fslow<-tcflow * fps2s3
tsom1_fslow<-tcflow -co2los -tsom3_fslow
#*****
#**** Passive
if(xpass>0.000001)
{
  tcflow<-xpass *defac * kpass* anerb *DT
  if(tcflow>xpass)
  {
    tcflow<-xpass
  }
}
else
{
  tcflow<-0.0
}
co2los<-tcflow*Ppass
#*cfsfs2=tcflow-co2los
tsom1_fpass<-tcflow-co2los
CO2out<<-CO2out+co2los
xpass_new <- xpass + tsom3_factv +tsom3_fslow -tcflow
#*****
#***** Active new
#xactv_new = xactv + tsom1_fpass
#xactv_new = xactv + tsom1_fslow
xactv_new <- xactv_new + tsom1_fslow + tsom1_fpass
#*****
#***** UPDATE
xsrfstr <<- xsrfstr_new
xsrfmet <<- xsrfmet_new
xsrfmic <<- xsrfmic_new
xbelstr <<- xbelstr_new
xbelmet <<- xbelmet_new
xactv <<- xactv_new
xslow <<- xslow_new
xpass <<- xpass_new
xwood1 <<- xwood1_new

```



```

xwood2 <<- xwood2_new
xwood3 <<- xwood3_new
#*****
somsc <<- xactv + xslow + xpass
talit <<- xsrfstr + xsrfmet + xsrfmic
tblit <<- xbelstr + xbelmet
somtC <<-xactv + xslow + xpass + xbelstr + xbelmet
tawood <<- xwood1 + xwood2
tbwood <<- xwood3
}
#end of functions
## calculate field capacity, wilting point #####
awilt
afiel
if(flag_fc_wtpt>0.0)
{
  somsc <- xactv + xslow + xpass
  calfc_wtpt()
}
awilt
afiel
## Initialize soil water condition #####
# essential to calculate deep asmos correctly
pet
calpet()
pet
for(month in 1:12)
{
  calwater(month)
}
obj.s <- ls()
#obj.s
#####
##   MAIN CENTURY SIMULATION           #####
carbon.out <- NULL
for(s in 1:1){
  id<-s

```

```

soil.carbon.year.out <-NULL
for(year in TSTART:TEND){
  CO2out<-0.0
  calpet()
  #month loop
  for(month in 1:12){
    #month=1
    tcleach<-0.0
    DT<-1.0/(12.0*CYCL)
    ##.....
    #Litterfall SITE SPECIFIC data
    flows.lfinfol<-litter.in [1,2]*leafdr[month]*(1.0/CYCL)
    flows.lfinbra<-litter.in [1,3]*(1.0/(12*CYCL))
    flows.lfinste<-litter.in [1,4]*(1.0/(12*CYCL))
    flows.lfinfir<-litter.in [1,5]*(1.0/(12*CYCL))
    flows.lfincor<-litter.in [1,6]*(1.0/(12*CYCL))
    talit <-xsrfstr + xsrfmet +xsrfmic
    tblit <- xbelstr + xbelmet
    tawood <- xwood1 + xwood2
    tbwood <- xwood3
    somsc <- xactv + xslow + xpass
    somtc <- xactv + xslow + xpass + xbelstr + xbelmet
    ##.....
    calstemp(month)
    calwater(month)
    if(snow>0.0)
    {
      stempmax <-0.0
      stempmin <-0.0
      stempave <-0.0
    }
    ##.....
    caldefac()
    calcenturyinput()
    # CENTURY CARBON FUNCTION SIMULATIONS
    # updated 4 times per month (CYCL=4)
    for(i in 1:CYCL)

```

```

        {
            calcentury()
        }
#end of centurycal CYCL loop
    }
#end of month loop ()
    ##.....
    ## site specific output of CENTURY carbon
    if(year==year) #TEND)
    {
        soil.carbon0 <- data.frame(id,year, month,
                                   xsrfstr, xsrfmet,
                                   xsrfmic, xbelstr, xbelmet,
                                   xactv, xslow, xpass, somsc,
                                   xwood1, xwood2, xwood3,
                                   CO2out, somtc)
    }

    soil.carbon.year.out <- rbind(soil.carbon.year.out,
                                   soil.carbon0)
}
#end of year loop
carbon.out <-rbind(carbon.out,soil.carbon.year.out )
}
#end of site.group for loop
options(digit=12)
century.out <-carbon.out[,c("id", "year", "month",
                           "CO2out", "somsc",
                           "xbelstr", "xbelmet",
                           "xactv", "xslow", "xpass",
                           "somtc")]
#convert gC.m-2 to tC.ha-1 by 1/1e6*1e4
century.out[,4:11]<-century.out[,4:11]/100
##.....
#plot components of soil carbon stock
#somtc <- xactv + xslow + xpass + xbelstr + xbelmet
#figure

```

```

par(mfrow=c(1,1), mar=c(5,5,1,1))
plot(century.out$year,century.out$somt,
     log="y", ylim=c(0.3,round(max(century.out$somt),1)+50),
     ylab="CENTURY soil carbon pools (tC/ha)",
     xlab="year")
lines(century.out$year,century.out$somt,
      lwd=2)
lines(century.out$year,century.out$xactv,
      col="blue", lwd=2)
lines(century.out$year,century.out$xslow,
      col="red", lwd=2)
lines(century.out$year,century.out$ypass,
      col="orange", lwd=2)
lines(century.out$year,century.out$xbelstr,
      col="grey", lwd=2)
lines(century.out$year,century.out$xbelmet,
      col="magenta", lwd=2)
legend("bottomright",
      c("total","active","slow","passive",
        "bg.structural","bg.metabolic"),
      col=c("black","blue","red","orange","grey","magenta"),
      pch=c(1,NA,NA,NA,NA,NA),
      lwd=2, lty=1, border="white",bg="white")

```

**Table S1.** Statistical characteristics (mean, standard error) of basic variables for groups of soils derived by recursive partitioning including soil variables (see Fig. 2a), compared with interpretation of carbon, moisture, and fertility of groups.

| N of soil samples in groups               |      | 959       | 909    | 136         | 335    | 182         | 296    | 180   | 8      | 142    | 83          |
|-------------------------------------------|------|-----------|--------|-------------|--------|-------------|--------|-------|--------|--------|-------------|
| Total SOC (tC ha <sup>-1</sup> )          | Mean | 65.1      | 81.8   | 130.2       | 86.2   | 126.4       | 103.9  | 136.8 | 268.6  | 143.7  | 203.1       |
|                                           | SE   | 1         | 1.3    | 5.1         | 2.6    | 4.8         | 2.8    | 4.2   | 23.7   | 6.7    | 9.8         |
| SOC mineral (tC ha <sup>-1</sup> )        | Mean | 45.4      | 56.4   | 86.9        | 68.5   | 98.4        | 73.2   | 92.4  | 230.6  | 108.8  | 153.3       |
|                                           | SE   | 1.6       | 2.1    | 8.2         | 4.9    | 9.1         | 4.5    | 7     | 33     | 12.8   | 21.6        |
| C/N                                       | Mean | 13.4      | 18.6   | 15.4        | 10.7   | 8.1         | 23.8   | 21.7  | 23.1   | 23.3   | 32.6        |
|                                           | SE   | 0.3       | 0.4    | 0.8         | 0.2    | 0.2         | 0.5    | 0.5   | 1.9    | 0.6    | 2           |
| H100 (m)                                  | Mean | 20.8      | 24.3   | 24.7        | 25.4   | 26.6        | 22.2   | 29.9  | 31     | 23.6   | 24          |
|                                           | SE   | 0.2       | 0.2    | 0.5         | 0.4    | 0.4         | 0.3    | 0.3   | 0.5    | 0.5    | 0.6         |
| Total Litter (tC ha <sup>-1</sup> )       | Mean | 2.7       | 3.3    | 3.4         | 3.5    | 3.6         | 3.1    | 4     | 3.8    | 3.2    | 3.5         |
|                                           | SE   | 0         | 0      | 0.1         | 0.1    | 0.1         | 0      | 0.1   | 0.2    | 0.1    | 0.1         |
| Temperature air (C)                       | Mean | 3.3       | 4.8    | 5.1         | 5.1    | 5.8         | 4.5    | 7.3   | 7.3    | 5.3    | 6.4         |
|                                           | SE   | 0.1       | 0.1    | 0.2         | 0.1    | 0.1         | 0.1    | 0.1   | 0.2    | 0.2    | 0.2         |
| Long-term moisture (%)                    | Mean | 20.2      | 22.4   | 26          | 23.6   | 26.2        | 22.9   | 22.9  | 21.3   | 21.8   | 25.7        |
|                                           | SE   | 0.2       | 0.2    | 0.6         | 0.3    | 0.5         | 0.4    | 0.4   | 1.3    | 0.5    | 0.7         |
| Precipitation (mm y-1)                    | Mean | 698.8     | 712.9  | 697.1       | 644.1  | 630.3       | 693    | 817.2 | 1173.2 | 687.9  | 619.4       |
|                                           | SE   | 5.7       | 7      | 18.8        | 10.4   | 12.5        | 10.8   | 21.2  | 162    | 18.1   | 27          |
| CEC (mmol <sub>c</sub> kg <sup>-1</sup> ) | Mean | 4.7       | 12.1   | 11.6        | 49.2   | 91.5        | 24     | 23.5  | 24.5   | 59.7   | 98.7        |
|                                           | SE   | 0.1       | 0.1    | 0.2         | 2.6    | 5.1         | 0.3    | 0.3   | 1.7    | 3.2    | 7.6         |
| pH                                        | Mean | 5.2       | 5.1    | 5.1         | 5.5    | 5.6         | 5      | 4.8   | 4.6    | 4.9    | 6           |
|                                           | SE   | 0         | 0      | 0           | 0      | 0.1         | 0      | 0     | 0.1    | 0.1    | 0.2         |
| Clay content (%)                          | Mean | 0.8       | 1.1    | 4.2         | 5.9    | 21.5        | 1.7    | 2.4   | 2.5    | 2.4    | 8           |
|                                           | SE   | 0.1       | 0.1    | 0.5         | 0.5    | 1           | 0.3    | 0.3   | 1.3    | 0.4    | 1.2         |
| Silt content (%)                          | Mean | 15.1      | 14.5   | 29          | 27.2   | 57.8        | 16.4   | 17.9  | 18.8   | 17.1   | 32.5        |
|                                           | SE   | 0.3       | 0.3    | 1.5         | 1.2    | 1.4         | 0.7    | 0.7   | 3.2    | 1      | 3           |
| Carbon                                    |      | low       | medium | high        | medium | high        | medium | high  | extra  | high   | extra       |
| Moisture                                  |      | dry-fresh | fresh  | moist-fresh | fresh  | moist-fresh | fresh  | fresh | fresh  | fresh  | moist-fresh |
| Fertility                                 |      | low       | medium | medium      | medium | high        | low    | high  | high   | medium | medium      |
| Soil group                                |      | 1         | 2      | 3           | 4      | 5           | 6      | 7     | 8      | 9      | 10          |

**Table S2.** Statistical characteristics (mean, standard error) of basic environmental and soil variables for regression tree of data groups classified by recursive partitioning with data excluding soil variables (see Fig. 3).

| Number of samples                        |      | 735.0              | 932.0                  | 796.0                           | 711.0                         | 56.0                |
|------------------------------------------|------|--------------------|------------------------|---------------------------------|-------------------------------|---------------------|
| Total soil carbon (tC ha <sup>-1</sup> ) | Mean | 67.1               | 85.4                   | 96.5                            | 120.1                         | 179.0               |
|                                          | SE   | 1.4                | 1.5                    | 2.0                             | 2.4                           | 12.5                |
| C/N                                      | Mean | 15.0               | 15.8                   | 16.8                            | 18.1                          | 35.2                |
|                                          | SE   | 0.3                | 0.3                    | 0.4                             | 0.4                           | 3.2                 |
| H100 (m)                                 | Mean | 19.0               | 19.7                   | 27.0                            | 30.1                          | 18.7                |
|                                          | SE   | 0.1                | 0.1                    | 0.1                             | 0.2                           | 0.3                 |
| Total Litter (tC ha <sup>-1</sup> )      | Mean | 2.3                | 2.8                    | 3.6                             | 4.0                           | 3.0                 |
|                                          | SE   | 0.0                | 0.0                    | 0.0                             | 0.0                           | 0.1                 |
| Soil water content (%)                   | Mean | 20.2               | 24.2                   | 22.0                            | 22.6                          | 22.3                |
|                                          | SE   | 0.2                | 0.2                    | 0.2                             | 0.2                           | 1.0                 |
| Temperature air (C)                      | Mean | 2.4                | 2.7                    | 6.4                             | 7.2                           | 7.2                 |
|                                          | SE   | 0.1                | 0.1                    | 0.0                             | 0.0                           | 0.0                 |
| pH                                       | Mean | 5.2                | 5.2                    | 5.3                             | 4.9                           | 7.2                 |
|                                          | SE   | 0.0                | 0.0                    | 0.0                             | 0.0                           | 0.1                 |
| Sand content (%)                         | Mean | 52.7               | 51.5                   | 47.2                            | 55.1                          | 36.2                |
|                                          | SE   | 0.5                | 0.5                    | 0.8                             | 0.6                           | 4.0                 |
| Clay content (%)                         | Mean | 0.8                | 2.6                    | 6.1                             | 3.0                           | 5.8                 |
|                                          | SE   | 0.1                | 0.2                    | 0.4                             | 0.2                           | 1.1                 |
| Silt content (%)                         | Mean | 14.6               | 19.2                   | 25.3                            | 20.0                          | 29.5                |
|                                          | SE   | 0.3                | 0.5                    | 0.8                             | 0.5                           | 4.1                 |
| Group acronym                            |      | low-C<br>cold.pine | median-C<br>cold.other | median-C<br>warm.rainy<br>low-N | hig-C<br>warm.rainy<br>high-N | extra-C<br>warm.dry |

**Table S3.** Species and classes of ground vegetation grouped into functional types (1-dwarfshrubs, 2-herbs, 3-grasses, 4-mosses and 5-lichens).

| Functional type | Ground vegetation                                                                                                                                                                                                                                                                                                                                                                                                                                                                                                                                                                                                                                                                                                                                                                                                                                                                                                                                                                                                                                                                                                                                                       |
|-----------------|-------------------------------------------------------------------------------------------------------------------------------------------------------------------------------------------------------------------------------------------------------------------------------------------------------------------------------------------------------------------------------------------------------------------------------------------------------------------------------------------------------------------------------------------------------------------------------------------------------------------------------------------------------------------------------------------------------------------------------------------------------------------------------------------------------------------------------------------------------------------------------------------------------------------------------------------------------------------------------------------------------------------------------------------------------------------------------------------------------------------------------------------------------------------------|
| 1               | <i>Vaccinium myrtillus</i> , <i>Vaccinium vitis-idaea</i> , <i>Arctostaphylos uva-ursi</i> , <i>Empetrum nigrum</i> ssp., <i>Calluna vulgaris</i> , <i>Erica tetralix</i> , <i>Vaccinium uliginosum</i> , <i>Rhododendron tomentosum</i> , <i>Andromeda polifolia</i> , <i>Vaccinium oxycoccus/microcarpum</i> , Other field layer plants                                                                                                                                                                                                                                                                                                                                                                                                                                                                                                                                                                                                                                                                                                                                                                                                                               |
| 2               | <i>Gymnocarpium dryopteris</i> , <i>Oxalis acetosella</i> , <i>Anemone nemorosa</i> , <i>Maianthemum bifolium</i> , <i>Chamaenerion angustifolium</i> , <i>Anthriscus sylvestris</i> , <i>Melampyrum pratense/sylvaticum</i> , <i>Equisetum sylvaticum</i> , <i>Menyanthes trifoliata</i> , <i>Rubus chamaemorus</i> , <i>Phegopteris connectilis</i> , <i>Hepatica nobilis</i> , <i>Geum rivale</i> , <i>Urtica dioica</i> , <i>Rumex acetosa</i> , <i>Stellaria nemorum</i> , <i>Stellaria holostea</i> , <i>Silene dioica</i> , <i>Aconitum lycoctonum</i> subsp. <i>septentrionale</i> , <i>Actaea erythrocarpa</i> , <i>Trollius europaeus</i> , <i>Cardamine bulbifera</i> , <i>Filipendula ulmaria</i> , <i>Mercurialis perennis</i> , <i>Sanicula europaea</i> , <i>Aegopodium podagraria</i> , <i>Librar</i> , <i>Galium odoratum</i> , <i>Lamium galeobdolon</i> , <i>Stachys sylvatica</i> , <i>Cirsium palustre</i> , <i>Cirsium heterophyllum</i> , <i>Lactuca alpina</i> , <i>Lactuca muralis</i> , <i>Crepis paludosa</i> , <i>Paris quadrifolia</i> , <i>Neottia ovata</i> , <i>Geranium sylvaticum</i> , <i>Rubus idaeus</i> , Other large grown ferns |
| 3               | Broad-leaved grass, Narrow-leaved grass, <i>Carex globularis</i> , Other sedges                                                                                                                                                                                                                                                                                                                                                                                                                                                                                                                                                                                                                                                                                                                                                                                                                                                                                                                                                                                                                                                                                         |
| 4               | <i>Pteridium aquilinum</i> , <i>Lycopodiaceae</i> , <i>Spagnum</i> spp, <i>Polytrichum commune</i> , <i>Pleurozium schreberi</i> , <i>Hylocomium splendens</i> , Other bryophytes                                                                                                                                                                                                                                                                                                                                                                                                                                                                                                                                                                                                                                                                                                                                                                                                                                                                                                                                                                                       |
| 5               | <i>Cladonia</i> , <i>Stereocaulon</i> spp, <i>Cladina</i> spp, <i>Cladonia</i> and <i>Cladina</i> , Other lichens                                                                                                                                                                                                                                                                                                                                                                                                                                                                                                                                                                                                                                                                                                                                                                                                                                                                                                                                                                                                                                                       |

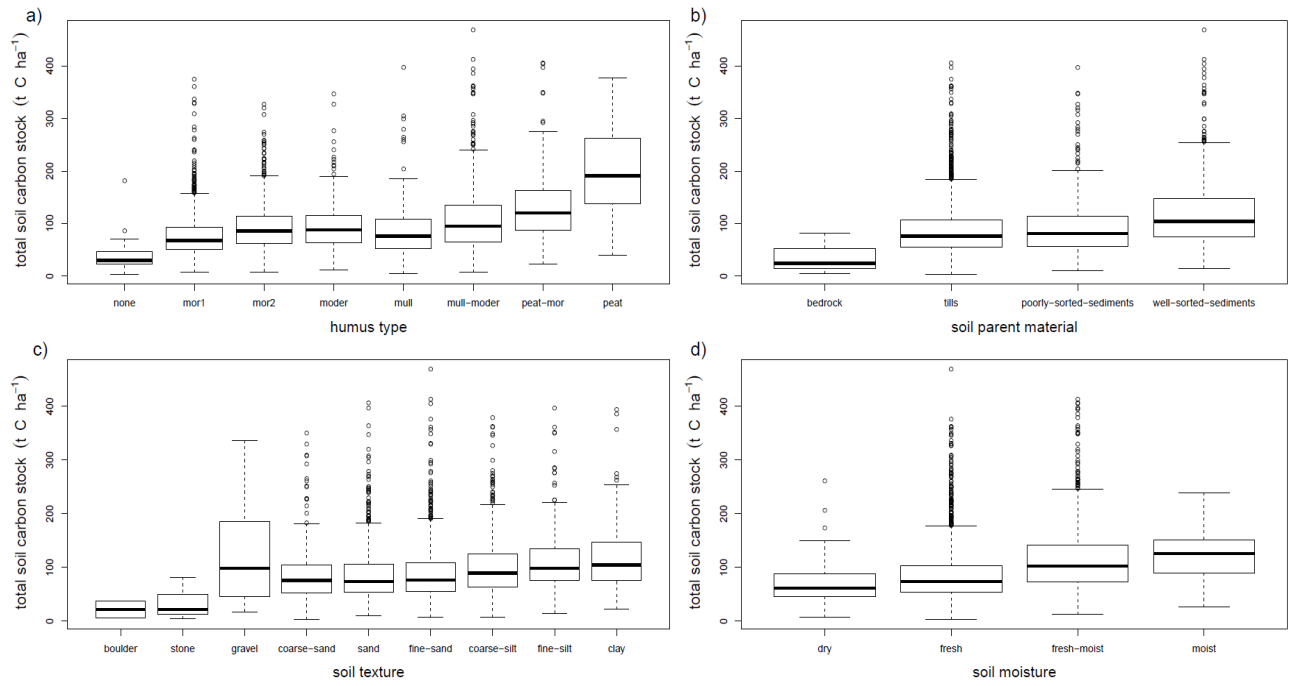

**Figure S1.** Boxplot main levels (minimum, 1st quartile, median, 3rd quartile, maximum, and dots for outliers) of the total soil carbon stock (tC ha<sup>-1</sup>) for SFSI categorical data on a) humus type, b) soil parent material, c) soil texture, and d) soil moisture.



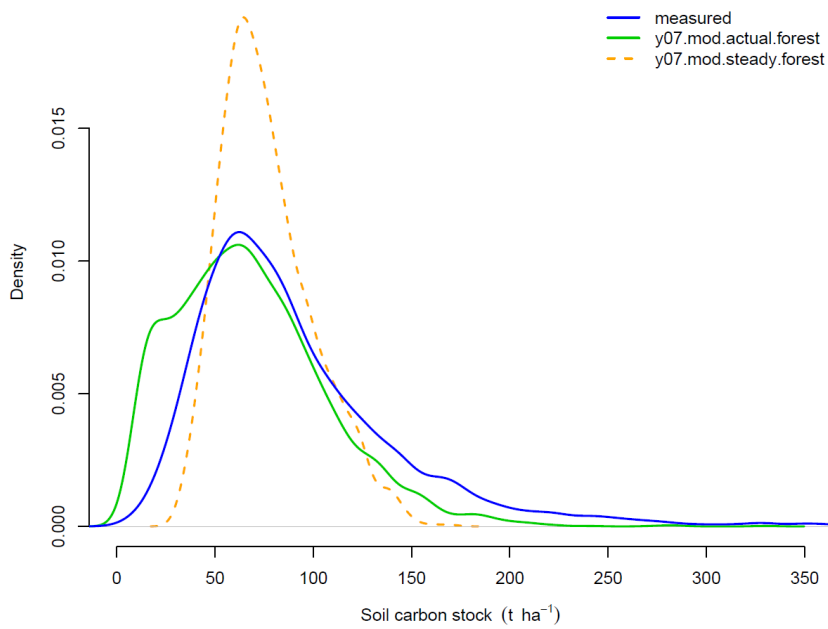

**Figure S2.** Density function of soil carbon stock measurements (measured) and the simulated soil carbon by the soil carbon model Yasso07 run with actual state forest and litter inputs (y07.mod.actual.forest) and with the steady state forest and litter inputs (y07.mod.steady.forest).

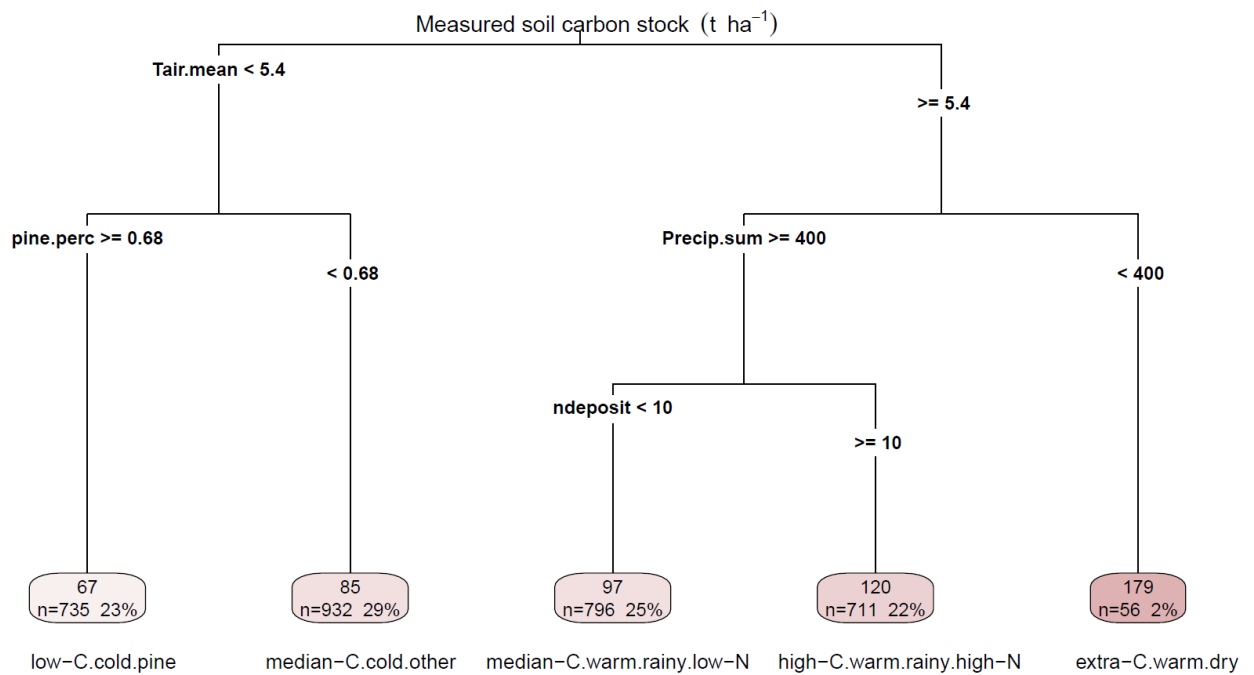

**Figure S3.** Classification/regression tree for the measured soil carbon stock ( $\text{tC ha}^{-1}$ ) and site environmental characteristics excluding soil physicochemical properties; the annual air temperature ( $T_{\text{air.mean}}$ ,  $^{\circ}\text{C}$ ), the fraction of pine trees of the total canopy (pine.perc), the annual precipitation sum (Precip.sum, mm), and the nitrogen deposition (ndeposit,  $\text{kgN ha}^{-1} \text{y}^{-1}$ ). The values in the leaves of the tree show for the distinct environmental conditions mean soil carbon stock ( $\text{tC ha}^{-1}$ ), number and percentage of samples. The group acronyms are shown below the leaves of the regression tree.

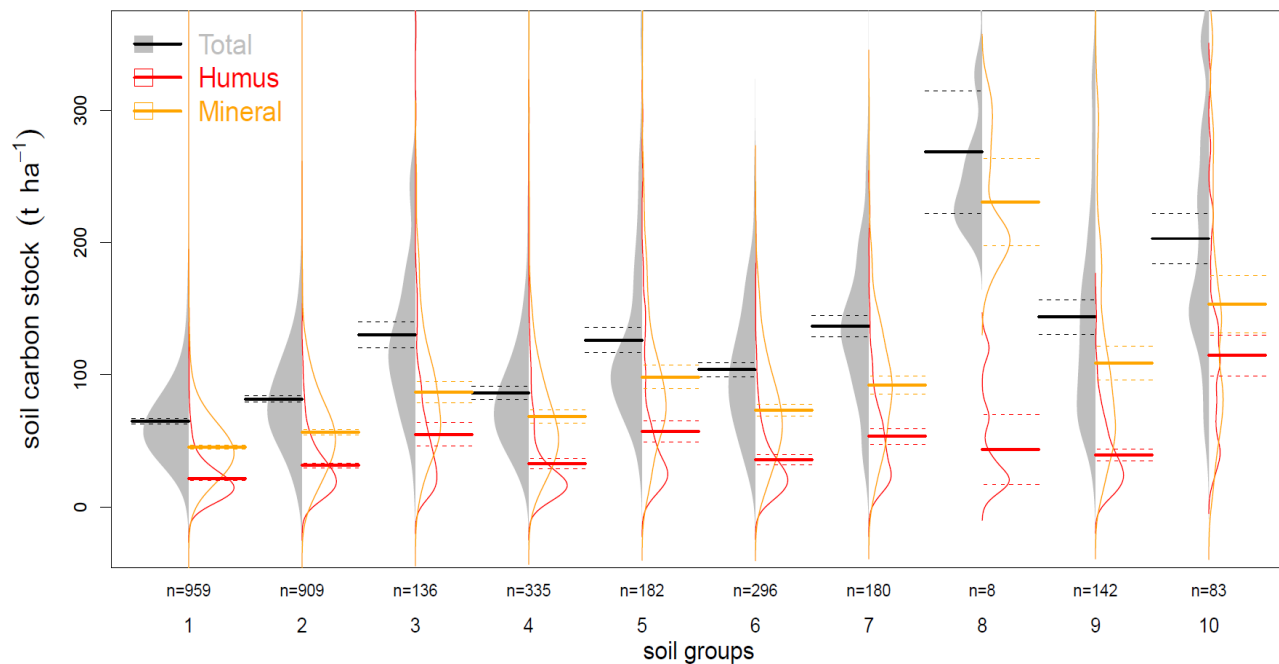

**Figure S4.** Density functions for 10 physicochemical groups of the soil carbon (SOC) stock ( $tC\ ha^{-1}$ ) Swedish forest soil inventory measurements for soil depth up to 1 m (total, grey fill) and for the soil humus horizon and mineral soil horizon. The thin lines are the density distributions. The thick lines are the group means and dashed lines are their confidence intervals. The n is number of samples. For description of group levels of SOC stocks, moisture, and fertility see Fig.2 and Table S1.

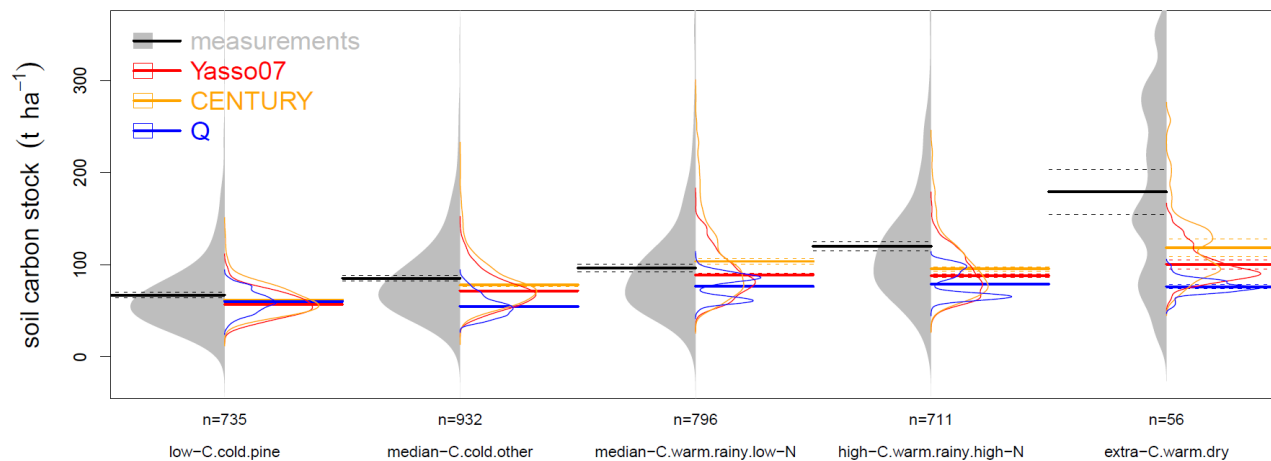

**Figure S5.** Bean plot of density functions for 5 groups of the soil carbon ( $tC\ ha^{-1}$ ) measurements (C.measured, grey fill) and soil carbon estimates simulated by the soil carbon models Yasso07, CENTURY, and Q with the litter input derived from the steady state forest. The thin lines are the density distributions. The thick lines are the group means and dashed lines are their confidence intervals. The n is number of samples. For description of group acronyms based on levels of SOC stocks, temperature, percentage of pine in canopy, precipitation, and nitrogen deposition see Fig.3 and Table S2.

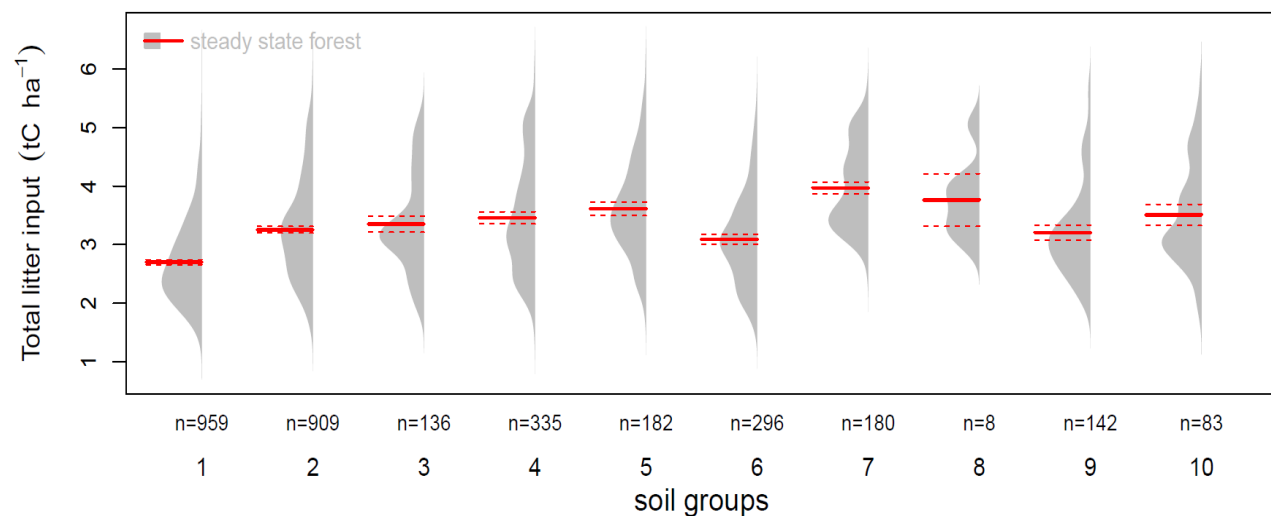

**Figure S6.** Density functions for 10 physicochemical groups of the total annual plant litter input ( $tC\ ha^{-1}$ ) of steady state forest. The thick lines are the group means and dashed lines are their confidence intervals. The n is number of samples. For description of group levels of SOC stocks, moisture, and fertility see Fig.2 and Table S1.

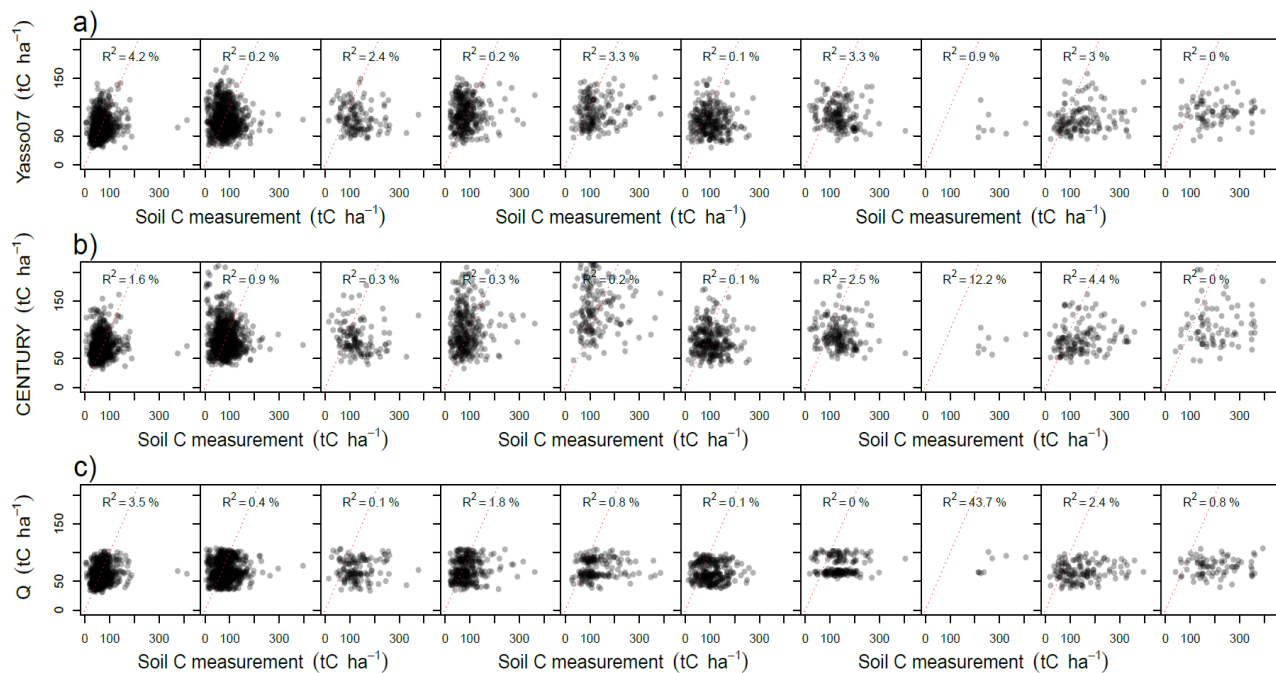

**Figure S7.** Scatter plots between model soil organic carbon stock (tC ha<sup>-1</sup>) measurements and a) Yasso07 and CENTURY, b) Yasso07 and Q, and c) CENTURY and Q for 10 physicochemical groups of Fig.2.

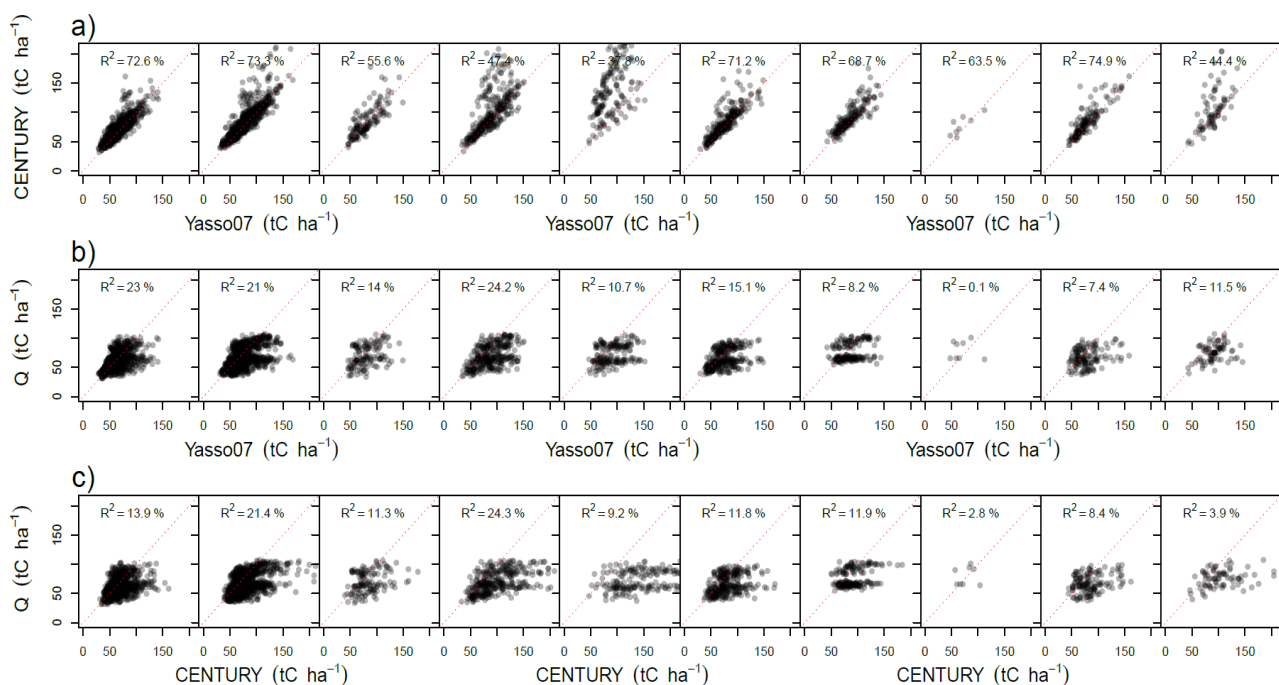

**Figure S8.** Scatter plots between model soil organic carbon estimates (tC ha<sup>-1</sup>) of a) Yasso07 and CENTURY, b) Yasso07 and Q, and c) CENTURY and Q for 10 physicochemical groups of Fig.2.

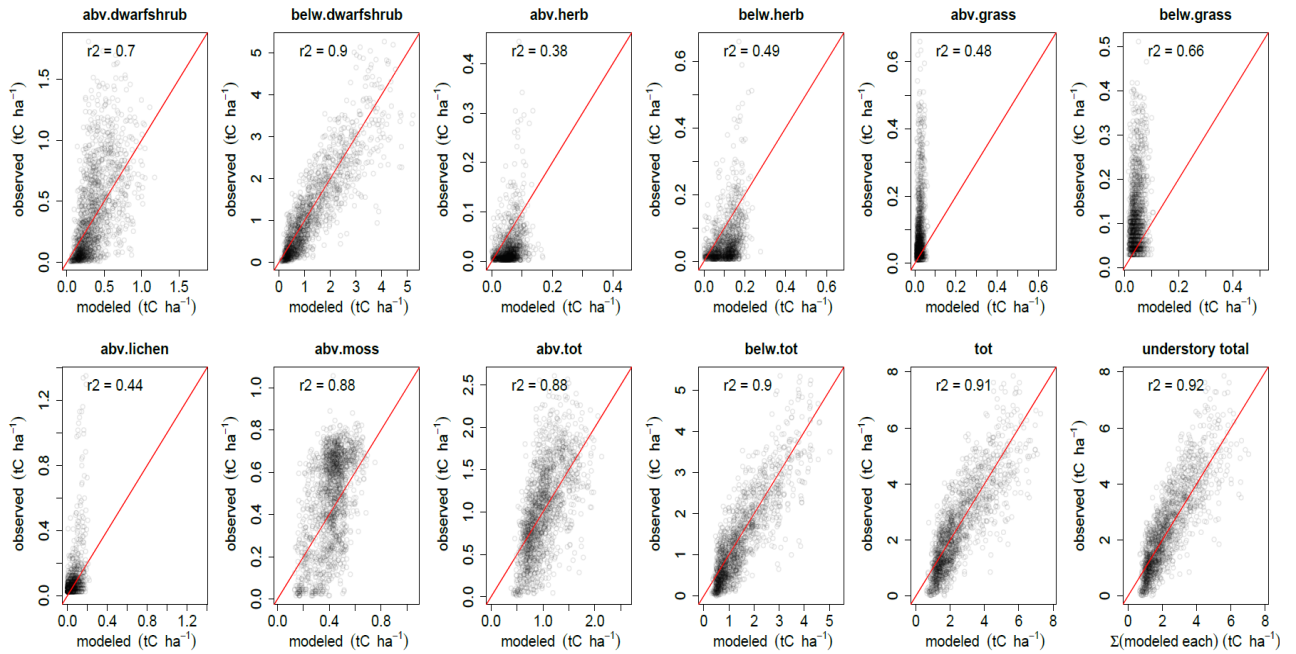

**Figure S9.** Scatter plots for the dry weight biomass ( $\text{tC ha}^{-1}$ ) of the functional types of understory vegetation for Swedish Forest Inventory plots in actual state being close to the estimated long-term mean conditions “steady state”. On the x-axis is the biomass modelled by the understory vegetation dry weight biomass ( $\text{tC ha}^{-1}$ ) models and on the y-axis is the observed coverage multiplied by the coverage/biomass conversion functions. The abbreviations “abv”, “belw”, and “tot” mean aboveground, belowground and total. The last panel for “understory total” shows high agreement between the sums of each modeled functional types and the sums of all functional types. The  $r^2$  values represent the coefficient of determination indicating how close the modeled values fit the observed values.

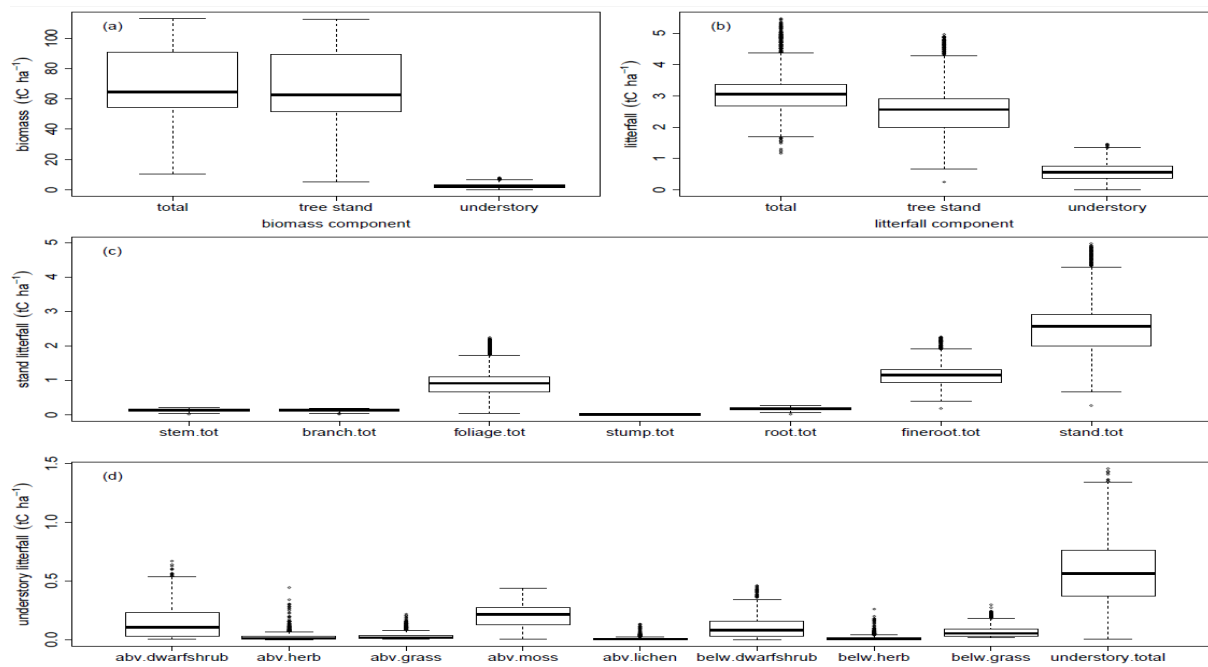

**Figure S10.** The tree stand and understorey forest (a) biomass, (b) litterfall, (c) stand litterfall and (d) understorey litterfall (all in  $\text{tC ha}^{-1}$ ) for Swedish Forest Inventory plots with available understorey coverage observations and in their actual state close to the estimated long-term mean conditions “steady state”.

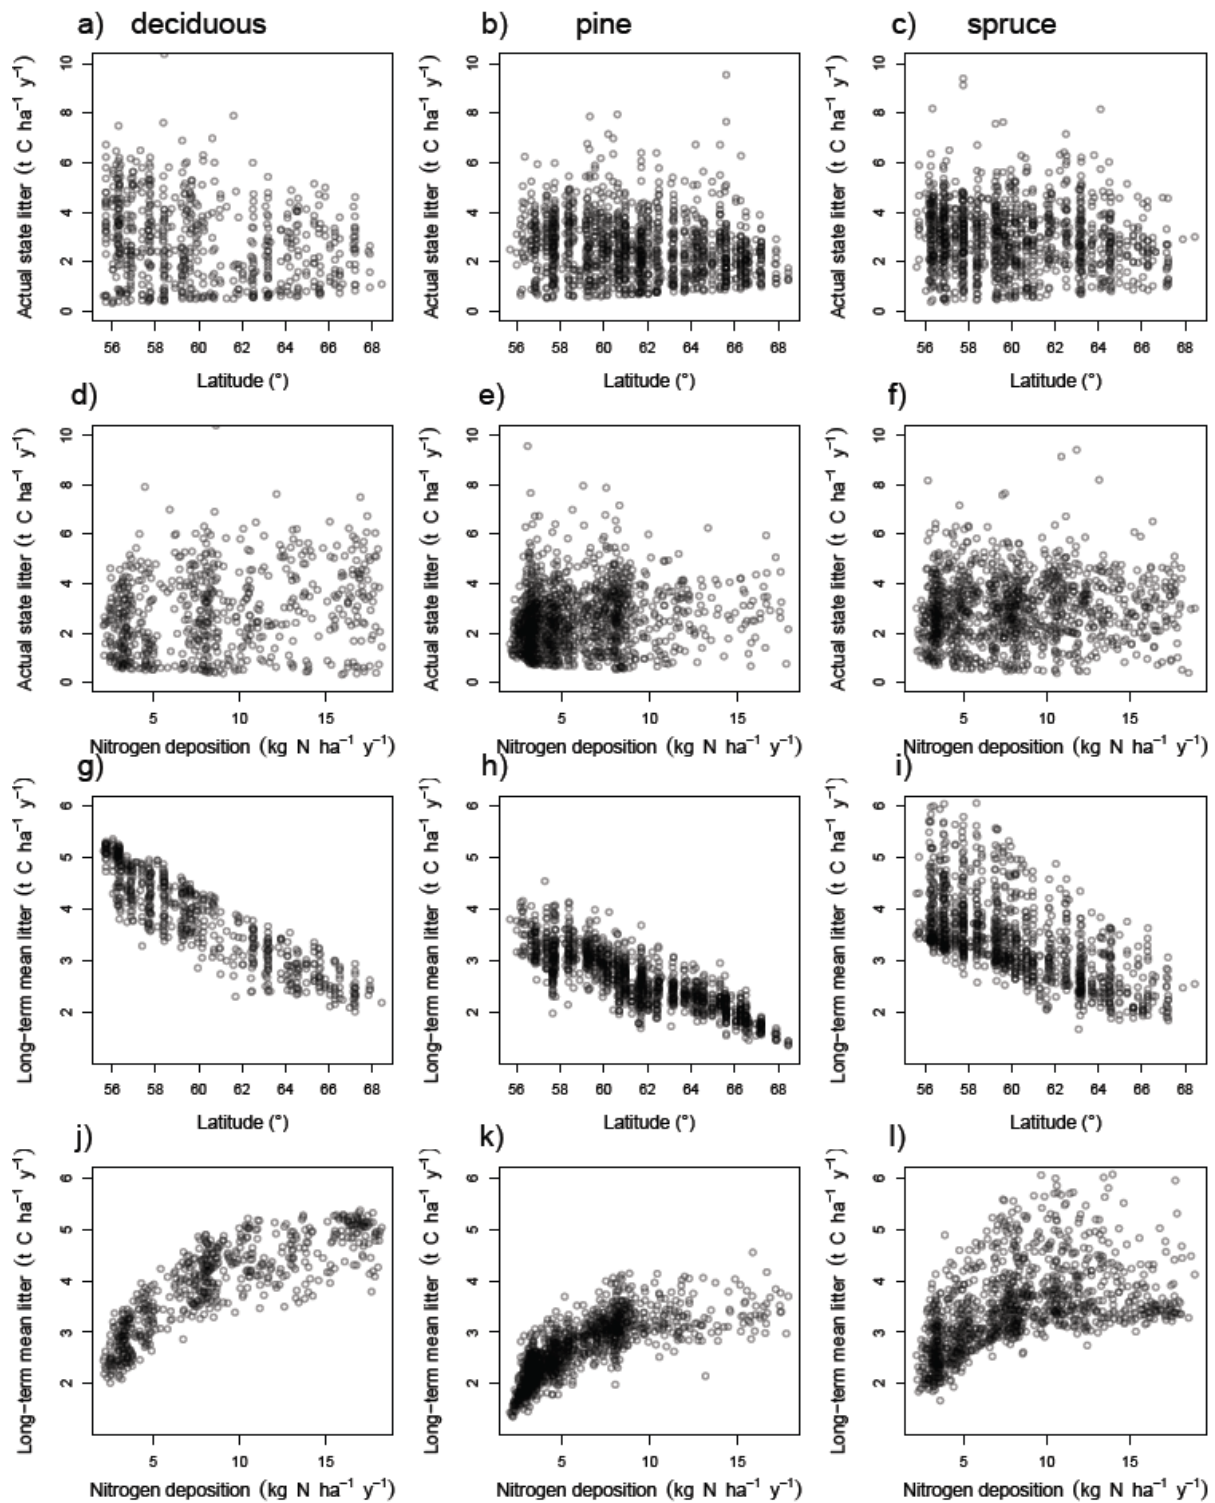

**Figure S11.** Scatterplots between Latitude (°) and the actual state forest litterfall (tC ha<sup>-1</sup> y<sup>-1</sup>) a), b), c) or long-term mean “steady state” forest litterfall (tC ha<sup>-1</sup> y<sup>-1</sup>), g) h), i); and scatterplots between Nitrogen deposition (kgN ha<sup>-1</sup> y<sup>-1</sup>) and the actual state forest litterfall (tC ha<sup>-1</sup> y<sup>-1</sup>) d), e), f) or long-term mean “steady state” forest litterfall (tC ha<sup>-1</sup> y<sup>-1</sup>) j), k), l) for deciduous species, Scots pine, and Norway spruce dominated stands.



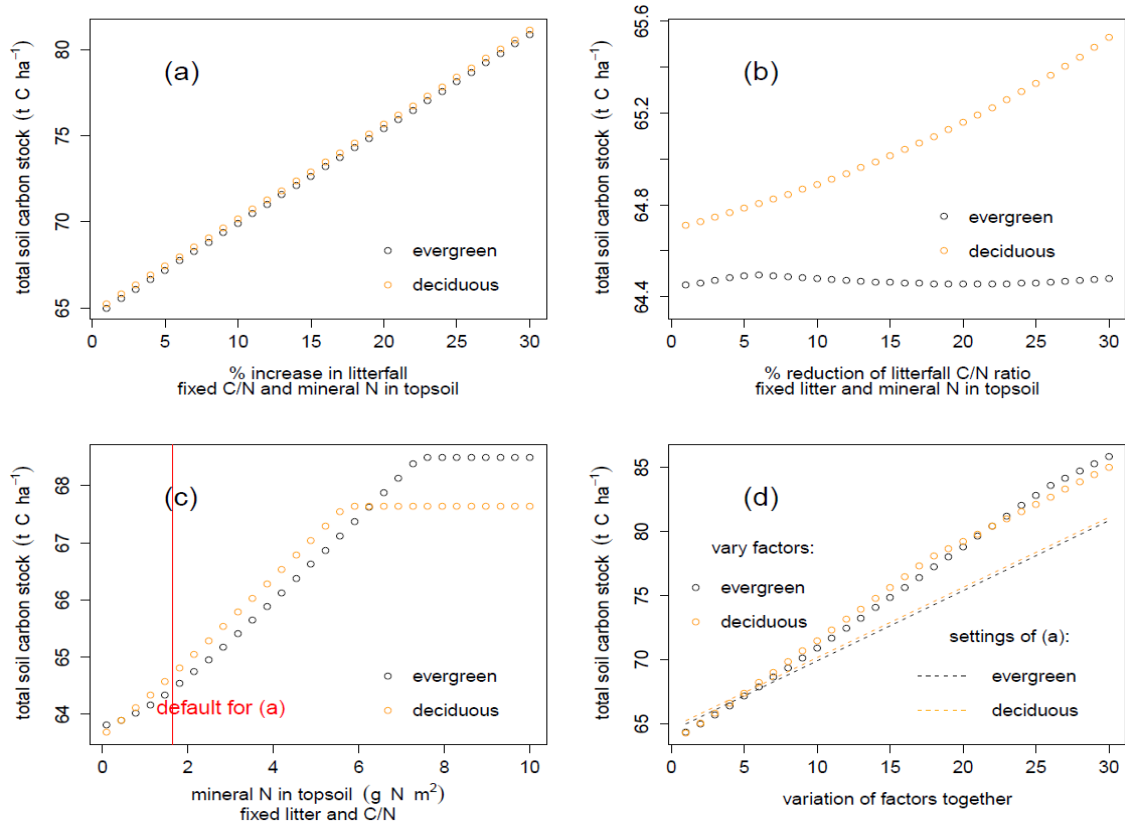

**Figure S12.** Sensitivity of simulated SOC stocks (t C ha<sup>-1</sup>) of CENTURY model to variation in litterfall (a), C/N ratio of litterfall (b), topsoil mineral N (g N m<sup>-2</sup>) (c), and to variation of factors together (d). SOC stocks of CENTURY are output of spin up simulation up to 1000 years.
